# Supplementary material for: Lithium-associated movement disorder: A literature review
Source: PubMed Central journal article supplement — Brain Circ. 2022 Jun 30;8(2):76–86. doi: 10.4103/bc.bc_77_21 (PMC9336594; doi:10.4103/bc.bc_77_21), 2022-06-30
Supplement: BC-8-76_Suppl1.pdf [file BC-8-76_Suppl1.pdf]

**Supplemental Table 2: Clinical reports of lithium-associated movement disorder**

| Main author         | Reference                                                                                                                                                                      | Country   | Year | Type | MCL                                                                                  | Number of patients reported      | Age | Sex    | LTM indication                                        |
|---------------------|--------------------------------------------------------------------------------------------------------------------------------------------------------------------------------|-----------|------|------|--------------------------------------------------------------------------------------|----------------------------------|-----|--------|-------------------------------------------------------|
| Coats DA            | Coats DA, Trautner EM, Gershon S. The treatment of lithium poisoning. <i>Australas Ann Med</i> 1957;6:11-5.                                                                    | Australia | 1957 | MCL  | Muscular jerks                                                                       | 1 (6)                            | 29  | Male   | Chronic maniacal excitement                           |
|                     |                                                                                                                                                                                |           |      | MCL  | Muscular twitches, fasciculation                                                     | 1 (6)                            | 65  | Female | Persistent gross maniacal excitement                  |
|                     |                                                                                                                                                                                |           |      | MCL  | Twitching of the small muscles of the hands and face and occasional gross limb jerks | 1 (6)                            | 73  | Female | Agitated senile confusion                             |
|                     |                                                                                                                                                                                |           |      | MCL  | Ataxia, muscular twitching                                                           | 1 (6)                            | 45  | Female | Maniacal excitement                                   |
|                     |                                                                                                                                                                                |           |      | MCL  | fibrillation                                                                         | 1 (6)                            | 37  | Male   | Schizophrenia, aggressivity                           |
|                     |                                                                                                                                                                                |           |      | MCL  | Ataxia, fasciculation                                                                | 1 (6)                            | 65  | Female | Recurrent mania                                       |
| Verbov JL           | Verbov JL, Phillips JD, Fife DG. A case of lithium intoxication. <i>Postgrad Med J</i> 1965;41:190-2.                                                                          | England   | 1965 | MCL  | Spasticity, hyperreflexia, dysarthria, ataxic gait, intention tremor                 | 1                                | 51  | Female | Schizophrenia, recurrent attacks of mania             |
| Shopsin B           | Shopsin B, Johnson G, Gershon S. Neurotoxicity with lithium: Differential drug responsiveness. <i>Int Pharmacopsychiatry</i> 1970;5:170-82.                                    | US        | 1970 | MCL  | Tremor, mask-like facies, grimacing, hypotonia, hyperreflexia, choreoathetosis       | 1 (4) - of 8 patients, 4 with MD | 34  | Female | Schizophrenic reaction, chronic undifferentiated type |
| Castaing R          | Castaing R, Bony D, Favarel-Garrigues JC, Cardinaud JP. Acute intoxication by lithium carbonate. <i>Eur J Toxicol</i> 1971;4:412-5.                                            | France    | 1971 | MCL  | Ataxia, dysarthria                                                                   | 1                                | ... | ...    | ...                                                   |
| Ittil TM            | Ittil TM, Akpinar S. Lithium effect on human electroencephalogram. <i>Clin Electroencephalogr</i> 1971;2:89-102.                                                               | US        | 1971 | MCL  |                                                                                      | 1                                | ... | ...    | ...                                                   |
| Favarel-Garrigues B | Favarel-Garrigues B, Favarel-Garrigues JC, Bourgeois M. 2 cases of severe poisoning by lithium carbonate. <i>Ann Med Psychol (Paris)</i> 1972;1:253-7.                         | France    | 1972 | MCL  |                                                                                      | 2                                | ... | ...    | ...                                                   |
| Settey A            | Settey A, Moene Y, Chazot G, Trillet M, Courjon J. Unusual clinical and electroencephalographic aspects induced by lithium-dopa association. <i>J Med Lyon</i> 1972;53:1401-3. | France    | 1972 | MCL  |                                                                                      | 1                                | ... | ...    | ...                                                   |

Contd...

**Supplemental Table 2: Contd...**

| Main author    | Reference                                                                                                                                                                                          | Country | Year | Type                                                                                      | Number of patients reported | Age | Sex    | LTM indication                             |
|----------------|----------------------------------------------------------------------------------------------------------------------------------------------------------------------------------------------------|---------|------|-------------------------------------------------------------------------------------------|-----------------------------|-----|--------|--------------------------------------------|
| Von Hartzsch B | Von Hartzsch B, Hoenich NA, Leigh RJ, Wilkinson R, Frost TH, Weddel A, <i>et al.</i> Permanent neurological sequelae despite haemodialysis for lithium intoxication. <i>Br Med J</i> 1972;4:757-9. | England | 1972 | MCL - Ataxia, hyperreflexia, flapping tremor, fluttering of eyelids                       | 1 (2) - 3 cases             | 50  | Female | Manic depressive and recurrent depressive? |
| Juul-Jensen P  | Juul-Jensen P, Schou M. Letter: Permanent brain damage after lithium intoxication. <i>Br Med J</i> 1973;4:673.                                                                                     | England | 1973 | MCL - Spasticity, hyperactive deep reflexes, myoclonic jerks                              | 1 (2)                       | 38  | Female | Suicidal intent                            |
| Cohen WJ       | Cohen WJ, Cohen NH. Lithium carbonate, haloperidol, and irreversible brain damage. <i>JAMA</i> 1974;230:1283-7.                                                                                    | US      | 1974 | MCL - Tremor, rigidity, muscular twitch, ataxia                                           | 1 (4)                       | 40  | Female | Mania                                      |
| Dyksen MW      | Dyksen MW, Halaris AE. Post-ECT asterixis associated with primary hyperparathyroidism. <i>Am J Psychiatry</i> 1978;135:1237-8.                                                                     | US      | 1978 | MCL - Asterixis                                                                           | 1                           | 48  | Female | Manic-depressive, manic type               |
| Dyksen MW      | Dyksen MW, Comaty JE, Pandey GN, Davis JM. Asterixis associated with a high RBC lithium concentration. <i>Am J Psychiatry</i> 1979;136:1610.                                                       | US      | 1979 | MCL - Asterixis                                                                           | 1                           | 22  | Female | Manic-depressive psychosis                 |
| Uchigata M     | Uchigata M, Tanabe H, Hasue I, Kurihara M. Peripheral neuropathy due to lithium intoxication. <i>Ann Neurol</i> 1981;9:414.                                                                        | Japan   | 1981 | MCL - Tremor, rigidity, twitch, dysarthria, unsteady gait                                 | 1                           | 56  | Male   | Manic psychosis                            |
| Apte SN        | Apte SN, Langston JW. Permanent neurological deficits due to lithium toxicity. <i>Ann Neurol</i> 1983;13:453-5.                                                                                    | US      | 1983 | MCL - Asterixis, tremor, decerebrate posturing, ataxia, choreiform and athetoid movements | 1 (2)                       | 38  | Male   | DPS, suicide attempt                       |

Contd...

**Supplemental Table 2: Contd...**

| Main author | Reference                                                                                                                                                              | Country | Year | Type                                                                               | Number of patients reported | Age | Sex    | LTM indication                              |
|-------------|------------------------------------------------------------------------------------------------------------------------------------------------------------------------|---------|------|------------------------------------------------------------------------------------|-----------------------------|-----|--------|---------------------------------------------|
| Rosen PB    | Rosen PB, Stevens R. Action myoclonus in lithium toxicity. <i>Ann Neurol</i> 1983;13:221-2.                                                                            | US      | 1983 | MCL - Repetitive action MCL                                                        | 1                           | 47  | Female | Schizoaffective illness                     |
| Sandyk R    | Sandyk R, Hurwitz MD. Toxic irreversible encephalopathy induced by lithium carbonate and haloperidol. A report of 2 cases. <i>S Afr Med J</i> 1983;64:875-6.           | US      | 1983 | MCL - Tremulousness, extrapyramidal and cerebellar dysfunction                     | 2                           | ... | ...    | ...                                         |
| Julius SC   | Julius SC, Brenner RP. Myoclonic seizures with lithium. <i>Biol Psychiatry</i> 1987;22:1184-90.                                                                        | US      | 1987 | MCL - Generalized tonic-clonic seizures followed by myoclonic seizures. dysarthria | 1 (2)                       | 35  | Female | Aggressive outbursts and paranoid delusions |
| Devanand DP | Devanand DP, Sackeim HA, Brown RP. Myoclonus during combined tricyclic antidepressant and lithium treatment. <i>J Clin Psychopharmacol</i> 1988;8:446-7.               | US      | 1988 | MCL - Jerks, gait                                                                  | 1                           | 43  | Female | Psychotic DPS                               |
| Lemus CZ    | Lemus CZ, Lieberman JA, Johns CA. Myoclonus during treatment with clozapine and lithium: The role of serotonin. <i>Hillside J Clin Psychiatry</i> 1989;11:127-30.      | US      | 1989 | MCL - Jerks, gait                                                                  | 1                           | 70  | Female | BD                                          |
| Simon LT    | Simon LT, Hsu B, Adornato BT. Carbamazepine-induced aseptic meningitis. <i>Ann Intern Med</i> 1990;112:627-8.                                                          | US      | 1990 | MCL                                                                                | 1                           | 50  | Male   | BD                                          |
| Vanhooren G | Vanhooren G, Dehaene I, Van Zandycke M, Piessens F, Vandenbergh V, Van Hees J, <i>et al.</i> Polynuropathy in lithium intoxication. <i>Muscle Nerve</i> 1990;13:204-8. | Belgium | 1990 | MCL                                                                                | 1 (2)                       | 54  | Male   | Manic-depressive                            |
|             |                                                                                                                                                                        |         |      | MCL                                                                                | 1 (2)                       | 37  | Female | Schizophrenia                               |

Contd...

**Supplemental Table 2: Contd...**

| Main author       | Reference                                                                                                                                                                                                      | Country | Year | Type                                                   | Number of patients reported | Age | Sex    | LTM indication                  |
|-------------------|----------------------------------------------------------------------------------------------------------------------------------------------------------------------------------------------------------------|---------|------|--------------------------------------------------------|-----------------------------|-----|--------|---------------------------------|
| Kojima H          | Kojima H, Terao T, Yoshimura R. Serotonin syndrome during clomipramine and lithium treatment. <i>Am J Psychiatry</i> 1993;150:1897.                                                                            | Japan   | 1993 | MCL                                                    | 1                           | 59  | Male   | DPS                             |
| Prettyman R       | Prettyman R. Lithium neurotoxicity at subtherapeutic serum levels. <i>Br J Psychiatry</i> 1994;164:123.                                                                                                        | US      | 1994 | MCL - Ataxia                                           | 1                           | 38  | Male   | Chronic psychotic disorder      |
| Rittmannsberger H | Rittmannsberger H, Leblhuber F. Drug-induced asterixis. <i>Dtsch Med Wochenschr</i> 1994;119:585-8.                                                                                                            | Austria | 1994 | MCL - Akinesia, rigor                                  | 1                           | 54  | Female | Acute schizoaffective psychosis |
| Loza B            | Loza B. A case of serotonin syndrome. <i>Psychiatr Pol</i> 1995;29:529-38.                                                                                                                                     | Poland  | 1995 | MCL                                                    | 1                           | 61  | Female | ...                             |
| Nisijima K        | Nisijima K, Shimizu M, Abe T, Ishiguro T. A case of serotonin syndrome induced by concomitant treatment with low-dose trazodone and amitriptyline and lithium. <i>Int Clin Psychopharmacol</i> 1996;11:289-90. | Japan   | 1996 | MCL - Tremor, hyperreflexia, rigidity                  | 1                           | 59  | Male   | BD                              |
| Rittmannsberger H | Rittmannsberger H. Asterixis induced by psychotropic drug treatment. <i>Clin Neuropharmacol</i> 1996;19:349-55.                                                                                                | Austria | 1996 | MCL - Asterixis                                        | 1 (7)                       | 59  | Female | BD                              |
|                   |                                                                                                                                                                                                                |         |      | MCL - Asterixis                                        | 1 (7)                       | 21  | Female | Mania                           |
|                   |                                                                                                                                                                                                                |         |      | MCL - Asterixis                                        | 1 (7)                       | 51  | Male   | Schizoaffective disorder        |
|                   |                                                                                                                                                                                                                |         |      | MCL - Asterixis                                        | 1 (7)                       | 33  | Female | BD                              |
|                   |                                                                                                                                                                                                                |         |      | MCL - Asterixis                                        | 1 (7)                       | 54  | Female | Schizoaffective disorder        |
|                   |                                                                                                                                                                                                                |         |      | MCL - Asterixis                                        | 1 (7)                       | 48  | Female | Schizoaffective disorder        |
|                   |                                                                                                                                                                                                                |         |      | MCL - Asterixis                                        | 1 (7)                       | 21  | Female | Schizoaffective disorder        |
| Evidente VG       | Evidente VG, Caviness JN. Focal cortical transient preceding myoclonus during lithium and tricyclic antidepressant therapy. <i>Neurology</i> 1999;52:211-3.                                                    | US      | 1999 | MCL - Shaking and jerking of the hands during activity | 1                           | 65  | Male   | BD                              |
| Lee SH            | Lee SH, Yang YY. Reversible neurotoxicity induced by a combination of clozapine and lithium: A case report. <i>Zhonghua Yi Xue Za Zhi (Taipei)</i> 1999;62:184-7.                                              | Taiwan  | 1999 | MCL - Ataxia, tremor, facial spasm                     | 1                           | ... | ...    | Refractory BD                   |

Contd...

**Supplemental Table 2: Contd...**

| Main author     | Reference                                                                                                                                                                           | Country | Year | Type                             | Number of patients reported | Age   | Sex    | LTM indication               |
|-----------------|-------------------------------------------------------------------------------------------------------------------------------------------------------------------------------------|---------|------|----------------------------------|-----------------------------|-------|--------|------------------------------|
| Stewart JT      | Stewart JT, Williams LS. A case of lithium-induced asterixis. J Am Geriatr Soc 2000;48:457.                                                                                         | US      | 2000 | MCL - Asterixis, tremor          | 1                           | 86    | Male   | Irritability and possible BD |
| Roccatagliata L | Roccatagliata L, Audenino D, Primavera A, Cocito L. Nonconvulsive status epilepticus from accidental lithium ingestion. Am J Emerg Med 2002;20:570-2.                               | Italy   | 2002 | MCL - NSCE                       | 1                           | 84    | Female | ...                          |
| Caviness JN     | Caviness JN, Evidente VG. Cortical myoclonus during lithium exposure. Arch Neurol 2003;60:401-4.                                                                                    | US      | 2003 | MCL                              | 1 (5)                       | 42-72 | ...    | Depression                   |
|                 |                                                                                                                                                                                     |         |      | MCL                              | 1 (5)                       | 42-72 | ...    | Depression                   |
|                 |                                                                                                                                                                                     |         |      | MCL                              | 1 (5)                       | 42-72 | ...    | BD                           |
|                 |                                                                                                                                                                                     |         |      | MCL                              | 1 (5)                       | 42-72 | ...    | BD                           |
|                 |                                                                                                                                                                                     |         |      | MCL                              | 1 (5)                       | 42-72 | ...    | BD                           |
| Smith D         | Smith D, Keane P, Donovan J, Malone K, McKenna TJ. Lithium encephalopathy. J R Soc Med 2003;96:590-1.                                                                               | Ireland | 2003 | MCL - Multifocal myoclonic jerks | 1                           | 67    | Male   | BD                           |
| Bender S        | Bender S, Linka T, Wolstein J, Gehendges S, Paulus HJ, Schall U, et al. Safety and efficacy of combined clozapine-lithium pharmacotherapy. Int J Neuropsychopharmacol 2004;7:59-63. | Germany | 2004 | MCL                              | 2                           | 39.5  | ...    | ...                          |
| Reif A          | Reif A, Leonhard C, Mössner R, Lesch KP, Falgatter AJ. Encephalopathy and myoclonus triggered by valproic acid. Prog Neuropsychopharmacol Biol Psychiatry 2004;28:1061-3.           | Germany | 2004 | MCL - Tremor                     | 1                           | 42    | Male   | Psychotic depression         |
| Kaplan PW       | Kaplan PW, Birbeck G. Lithium-induced confusional states: Nonconvulsive status epilepticus or triphasic encephalopathy? Epilepsia 2006;47:2071-4.                                   | US      | 2006 | MCL                              | 1 (5)                       | 71    | Female | BD                           |
|                 |                                                                                                                                                                                     |         |      | MCL                              | 1 (5)                       | 49    | Female | Psychiatric disorder         |
|                 |                                                                                                                                                                                     |         |      | MCL                              | 1 (5)                       | 51    | Female | BD, mental retardation       |
|                 |                                                                                                                                                                                     |         |      | MCL                              | 1 (5)                       | 51    | Male   | BD, schizophrenia            |
|                 |                                                                                                                                                                                     |         |      | MCL                              | 1 (5)                       | 55    | Female | BD, acute mania              |

Contd...

**Supplemental Table 2: Contd...**

| Main author     | Reference                                                                                                                                                                              | Country  | Year | Type                                                 | Number of patients reported | Age | Sex    | LTM indication                                      |
|-----------------|----------------------------------------------------------------------------------------------------------------------------------------------------------------------------------------|----------|------|------------------------------------------------------|-----------------------------|-----|--------|-----------------------------------------------------|
| Grueneberger EC | Grueneberger EC, Maria Rountree E, Baron Short E, Kahn DA. Neurotoxicity with therapeutic lithium levels: A case report. <i>J Psychiatr Pract</i> 2009;15:60-3.                        | US       | 2009 | MCL - Fasciculation, myoclonic jerks                 | 1                           | 20  | Male   | BD type I                                           |
| Mahasuar R      | Mahasuar R, Kuruvilla A, Jacob K. Palatal tremor after lithium and carbamazepine use: A case report. <i>J Med Case Rep</i> 2010;4:176.                                                 | India    | 2010 | MCL - Palatal MCL                                    | 1                           | 27  | Male   | Episode suggestive of mania with psychotic symptoms |
| Almeida AG      | Almeida AG, Cerqueira T, Bento L. A case of chronic lithium intoxication. <i>Eur J Intern Med</i> 2011;22:3.                                                                           | Portugal | 2011 | MCL - Myoclonic jerks, muscular rigidity, EP tremors | 1                           | ... | Female | BD                                                  |
| Bakelants E     | Bakelants E, Peter V. A 61-year-old patient with acute neurologic deterioration. <i>Tijdschr Geneeskund</i> 2013;69:37-9.                                                              | Belgium  | 2013 | MCL                                                  | 1                           | 61  | Female | BD                                                  |
| Chen WY         | Chen WY, Chen AC, Tsai SJ, Lin JJ. Reversible orolingual dyskinesia related to lithium intoxication. <i>Acta Neurol Taiwan</i> 2013;22:32-5.                                           | Taiwan   | 2013 | MCL - Orolingual DKN                                 | 1                           | 68  | Male   | BD                                                  |
| Mignarri A.     | Mignarri A, Chini E, Rufa A, Rocchi R, Federico A, Dotti MT. Lithium neurotoxicity mimicking rapidly progressive dementia. <i>J Neurol</i> 2013;260:1152-4.                            | Italy    | 2013 | MCL - Ideomotor apraxia, gait ATX, dysmetria         | 1                           | 60  | Female | BD                                                  |
| Kitami M        | Kitami M, Ozumi H, Kish SJ, Funukawa Y. Takotsubo cardiomyopathy associated with lithium intoxication in bipolar disorder: A case report. <i>J Clin Psychopharmacol</i> 2014;34:410-1. | Japan    | 2014 | MCL - ATX, tremor                                    | 1                           | 78  | Female | BD                                                  |

Contd...

**Supplemental Table 2: Contd...**

| Main author   | Reference                                                                                                                                                                                                                                                                                                               | Country | Year | Type                              | Number of patients reported | Age      | Sex            | LTM indication           |
|---------------|-------------------------------------------------------------------------------------------------------------------------------------------------------------------------------------------------------------------------------------------------------------------------------------------------------------------------|---------|------|-----------------------------------|-----------------------------|----------|----------------|--------------------------|
| Fitzgerald RT | Fitzgerald RT, Fitzgerald CT, Samant RS, Kumar M, Ramakrishniah R, Van Hemert R, <i>et al.</i> . Lithium toxicity and PRES: A novel association. J Neuroimaging 2015;25:147-9.                                                                                                                                          | US      | 2014 | MCL                               | 1 (2)<br>1 (2)              | 50<br>61 | Female<br>Male | BD<br>BD                 |
| Loens S       | Loens S, Conzen J, Welte GS, Scharn N, Schrader C, Weissenborn K. Reversible posterior leukoencephalopathy syndrome after withdrawal of antipsychotic medication in the context of lithium intoxication. Gen Hosp Psychiatry 2015;37:274.e3-5.                                                                          | Germany | 2015 | MCL - Generalized MCL, dysarthria | 1                           | 60       | Female         | Schizoaffective disorder |
| Vandewalle W  | Vandewalle W, Boon E, Sienaert P. Movement disorders due to modern antidepressants and mood stabilizers. Tijdschr Psychiatr 2015;57:132-7.                                                                                                                                                                              | Belgium | 2015 | MCL                               | 2                           | ...      | ...            | ...                      |
| Hayashi Y     | Hayashi Y, Nishida S, Takekoshi A, Murakami M, Yamada M, Kimura A, <i>et al.</i> . A case of lithium intoxication induced by an antihypertensive angiotensin 1 subtype-specific angiotensin II receptor blocker in an elderly patient with bipolar disorder and hypertension. Nihon Ronen Igakkai Zasshi 2016;53:244-9. | Japan   | 2016 | MCL - Action tremor, MCL, ATX     | 1                           | 65       | Female         | BD type 1                |
| Heilmann MJ   | Heilmann MJ, Gupta N. Silent danger: Lithium toxicity and associated neurologic sequelae. Am J Respir Crit Care Med 2017;195:A3799.                                                                                                                                                                                     | US      | 2017 | MCL                               | 1                           | 66       | Male           | BD                       |

Contd...

**Supplemental Table 2: Contd...**

| Main author     | Reference                                                                                                                                                                                     | Country        | Year | Type                                           | Number of patients reported | Age | Sex    | LTM indication |
|-----------------|-----------------------------------------------------------------------------------------------------------------------------------------------------------------------------------------------|----------------|------|------------------------------------------------|-----------------------------|-----|--------|----------------|
| Kayipmaz S      | Kayipmaz S, Altinöz AE, Ok NEG. Lithium intoxication: A possible interaction with moxifloxacin. Clin Psychopharmacol Neurosci 2017;15:407-9.                                                  | Turkey         | 2017 | MCL - Tremor                                   | 1                           | 74  | Female | BD             |
| Stetkarova I    | Stetkarova I, Bocek V, Gismatullina A, Svobodova Z, Peisker T. Severe chronic lithium intoxication in patient treated for bipolar disorder. Neuro Endocrinol Lett 2017;38:397-400.            | Czech Republic | 2017 | MCL - Tremor, ATX, dysarthria, generalized MCL | 1                           | 72  | Female | BD             |
| Jacobson JC     | Jacobson JC, Garcia-Pittman EC. Case of a patient with bipolar disorder and delayed subcortical dementia onset following acute lithium toxicity. Am J Geriatr Psychiatry 2018;26:S97.         | US             | 2018 | MCL - Tremor, aphasia                          | 1                           | ... | Female | BD             |
| Orleans RA      | Orleans RA, Dubin MJ, Kast KA. The effect of a therapeutic lithium level on a stroke-related cerebellar tremor. BMJ Case Rep 2018;2018:bcr2017222920.                                         | US             | 2018 | MCL - Generalized MCL, coarse tremor           | 1                           | ... | ...    | ...            |
| Sarrigiannis PG | Sarrigiannis PG, Zis P, Unwin ZC, Blackburn DJ, Hoggard N, Zhao Y, <i>et al.</i> . Tremor after long term lithium treatment; is it cortical myoclonus? Cerebellum Ataxias 2019;6:5.           | UK             | 2019 | MCL - Action and stimulus reflex cortical MCL  | 1 (8)                       | 77  | Female | ...            |
|                 |                                                                                                                                                                                               |                |      | MCL - Cortical source                          | 1 (8)                       | 63  | Female | ...            |
|                 |                                                                                                                                                                                               |                |      | MCL - Cortical source                          | 1 (8)                       | 57  | Male   | ...            |
|                 |                                                                                                                                                                                               |                |      | MCL - Cortical source                          | 1 (8)                       | 47  | Female | ...            |
|                 |                                                                                                                                                                                               |                |      | MCL - Cortical source                          | 1 (8)                       | 55  | Female | ...            |
|                 |                                                                                                                                                                                               |                |      | MCL - Cortical source                          | 1 (8)                       | 70  | Female | ...            |
|                 |                                                                                                                                                                                               |                |      | MCL - Cortical source                          | 1 (8)                       | 42  | Female | ...            |
|                 |                                                                                                                                                                                               |                |      | MCL - Central tremor                           | 1 (8)                       | 66  | Male   | ...            |
| Vallianou N     | Vallianou N, Konstantinou F, Gennimata V, Michalopoulos P, Geladari E, Kounatidis D. A case of Syndrome of Irreversible Lithium Effectuated Neurotoxicity (SILENT). Neth J Med 2019;77:301-2. | Holland        | 2019 | MCL - Coarse tremor                            | 1                           | 74  | Male   | BD             |

Contd...



**Supplemental Table 2: Contd...**

| Main author | Reference                                                                                                                                                                                                                        | Country | Year | Type         | Number of patients reported | Age            | Sex    | LTM indication                                                                                                                                       |  |
|-------------|----------------------------------------------------------------------------------------------------------------------------------------------------------------------------------------------------------------------------------|---------|------|--------------|-----------------------------|----------------|--------|------------------------------------------------------------------------------------------------------------------------------------------------------|--|
| Kiziltan ME | Kiziltan ME, Gündüz A, Ser MH, Yeni SN, Özkara C, Demirbilek V, <i>et al</i> . The association between causes and electrophysiology in myoclonus: When and why electrophysiology? <i>Neurol Sci Neurophysiol</i> 2020;37:176-82. | Turkey  | 2020 | MCL          | ...                         | 26.3 (SD=11.4) | ...    | ...                                                                                                                                                  |  |
| Nagamine T  | Nagamine T. Lithium intoxication in the elderly: A possible interaction between azilsartan, fluvoxamine, and lithium. <i>Innov Clin Neurosci</i> 2020;17:45-6.                                                                   | Japan   | 2020 | MCL - Tremor | 1                           | 82             | Male   | BD                                                                                                                                                   |  |
| Burton C    | Burton C, Mathys M, Gutierrez E. Comparison of lithium to second generation antipsychotics for the treatment of bipolar disorder in older veterans. <i>Psychiatry Res</i> 2021;303:114063.                                       | US      | 2021 | MCL - Tremor | 1                           | ...            | ...    | ...                                                                                                                                                  |  |
| Hyder S     | Hyder S, Hundal J, Rasheed A. 817: Lethal lithium: A rare case of persistent neurotoxicity. <i>Crit Care Med</i> 2021;49:405.                                                                                                    | US      | 2021 | MCL - Tremor | 1                           | 54             | Female | BD                                                                                                                                                   |  |
| <b>PKN</b>  |                                                                                                                                                                                                                                  |         |      |              |                             |                |        |                                                                                                                                                      |  |
| Dalén P     | Dalén P, Steg G. Lithium and levodopa in Parkinsonism. <i>Lancet</i> 1973;1:936-7.                                                                                                                                               | Sweden  | 1973 | PKN          | 1 (2)                       | ...            | Male   | Reduce hyperkinetic phenomena (caused by Parkinson's disease) without a considerable increase of parkinsonian symptoms                               |  |
| Cohen WJ    | Cohen WJ, Cohen NH. Lithium carbonate, haloperidol, and irreversible brain damage. <i>JAMA</i> 1974;230:1283-7.                                                                                                                  | US      | 1974 | PKN - ATX    | 1 (4)                       | 34             | Female | Reduce hyperkinetic phenomena (caused by Parkinson's disease) without a considerable increase of parkinsonian symptoms<br>Manic-depressive psychosis |  |

Contd...

**Supplemental Table 2: Contd...**

| Main author | Reference                                                                                                                       | Country | Year | Type                                                          | Number of patients reported | Age         | Sex                     | LTM indication                                 |
|-------------|---------------------------------------------------------------------------------------------------------------------------------|---------|------|---------------------------------------------------------------|-----------------------------|-------------|-------------------------|------------------------------------------------|
| Shopsin B   | Shopsin B, Gershon S. Cogwheel rigidity related to lithium maintenance. Am J Psychiatry 1975;132:536-8.                         | US      | 1975 | PKN - Cogwheel rigidity                                       | 1 (16)                      | 57          | Male                    | BD                                             |
|             |                                                                                                                                 |         |      |                                                               | 1 (16)                      | 75          | Female                  | BD                                             |
|             |                                                                                                                                 |         |      |                                                               | 1 (16)                      | 38          | Female                  | BD                                             |
|             |                                                                                                                                 |         |      |                                                               | 1 (16)                      | 55          | Female                  | BD                                             |
|             |                                                                                                                                 |         |      |                                                               | 1 (16)                      | 74          | Female                  | BD                                             |
|             |                                                                                                                                 |         |      |                                                               | 1 (16)                      | 57          | Female                  | Unipolar disorder                              |
|             |                                                                                                                                 |         |      |                                                               | 1 (16)                      | 35          | Female                  | Unipolar disorder                              |
|             |                                                                                                                                 |         |      |                                                               | 1 (16)                      | 38          | Female                  | Unipolar disorder                              |
|             |                                                                                                                                 |         |      |                                                               | 1 (16)                      | 28          | Female                  | Unipolar disorder                              |
|             |                                                                                                                                 |         |      |                                                               | 1 (16)                      | 60          | Female                  | Unipolar disorder                              |
|             |                                                                                                                                 |         |      |                                                               | 1 (16)                      | 37          | Female                  | BD                                             |
|             |                                                                                                                                 |         |      |                                                               | 1 (16)                      | 65          | Female                  | BD                                             |
|             |                                                                                                                                 |         |      |                                                               | 1 (16)                      | 51          | Male                    | BD                                             |
|             |                                                                                                                                 |         |      |                                                               | 1 (16)                      | 56          | Female                  | Unipolar disorder                              |
| Branchey MH | Branchey MH, Charles J, Simpson GM. Extrapyramidal side effects in lithium maintenance therapy. Am J Psychiatry 1976;133:444-5. | US      | 1976 | PKN - Cogwheel rigidity, limb rigidity, tremor of extremities | 3 (36)                      | 46.1 (mean) | ... (11 male 25 female) | ... (33 manic-depressive and 3 schizoffective) |
|             |                                                                                                                                 |         |      |                                                               | 6                           | 36-63       | ...                     | Manic-depressive illness for 2-20 years        |
| Lutz EG     | Lutz EG. Acute lithium-induced Parkinsonism precipitated by liquid protein diet. J Med Soc N J 1978;75:165-6.                   | US      | 1978 | PKN                                                           | 1                           | ...         | ...                     | ...                                            |
|             |                                                                                                                                 |         |      |                                                               | 38 (97)                     | 47.2 (mean) | ... (41 male 56 female) | Manic-depressive illness                       |
| Asnis GM    | Asnis GM, Asnis D, Dunner DL, Fieve RR. Cogwheel rigidity during chronic lithium therapy. Am J Psychiatry 1979;136:1225-6.      | US      | 1979 | PKN - Cogwheel rigidity, tremor                               | 1 (2)                       | 56          | Female                  | Manic-depressive psychosis                     |
|             |                                                                                                                                 |         |      |                                                               | 1 (2)                       | 66          | Female                  | Manic-depressive illness                       |
| Tyrer P     | Tyrer P, Alexander MS, Regan A, Lee I. An extrapyramidal syndrome after lithium therapy. Br J Psychiatry 1980;136:191-4.        | England | 1980 | PKN - Tremor, cogwheel rigidity, mask-like face               | 1 (2)                       | 66          | Female                  | Manic-depressive illness                       |
|             |                                                                                                                                 |         |      |                                                               | 1 (2)                       | 66          | Female                  | Manic-depressive illness                       |

Contd...

**Supplemental Table 2: Contd...**

| Main author  | Reference                                                                                                                                                   | Country | Year | Type                                                                                    | Number of patients reported | Age                                                                         | Sex                                   | LTM indication                                                         |
|--------------|-------------------------------------------------------------------------------------------------------------------------------------------------------------|---------|------|-----------------------------------------------------------------------------------------|-----------------------------|-----------------------------------------------------------------------------|---------------------------------------|------------------------------------------------------------------------|
| Reches A     | Reches A, Tietler J, Lavy S. Parkinsonism due to lithium carbonate poisoning. Arch Neurol 1981;38:471.                                                      | US      | 1981 | PKN - Tremor, muscular rigidity, bradykinesia, cogwheel rigidity                        | 1                           | 62                                                                          | Male                                  | Depression                                                             |
| Spring G     | Spring G, Frankel M. New data on lithium and haloperidol incompatibility. Am J Psychiatry 1981;138:818-21.                                                  | US      | 1981 | PKN - Rigidity, dysarthria, DKN, cogwheeling                                            | 1                           | 53                                                                          | Male                                  | Manic-depressive illness, severe manic attacks, depressive episodes    |
| Apte SN      | Apte SN, Langston JW. Permanent neurological deficits due to lithium toxicity. Ann Neurol 1983;13:453-5.                                                    | US      | 1983 | PKN - Rigidity, ATX, dysmetria                                                          | 1 (2)                       | 46                                                                          | Female                                | Manic depressive illness                                               |
| Donaldson IM | Donaldson IM, Cuningham J. Persisting neurologic sequelae of lithium carbonate therapy. Arch Neurol 1983;40:747-51.                                         | US      | 1983 | PKN - ATX, rigidity, tremor, incoordination, dysarthria<br>PKN - Cogwheel rigidity, DKN | 1 (2)<br>1 (2)              | 53<br>53                                                                    | Female<br>Female                      | Manic-depressive illness<br>Manic-depressive illness                   |
| Perényi A    | Perényi A, Rihmer Z, Bánki CM. Parkinsonian symptoms with lithium, lithium-neuroleptic, and lithium-antidepressant treatment. J Affect Disord 1983;5:171-7. | Hungary | 1983 | PKN - Tremor, rigidity, AKT, and akinesia                                               | 5 (24)                      | 45.2 (average).<br>The youngest being 23, and the oldest being 71 years old | Female                                | BD I (n=35), BD II (n=27), unipolar (n=7) and schizoaffective (n=12)   |
| Lang AE      | Lang AE. Lithium and Parkinsonism. Ann Neurol 1984;15:214.                                                                                                  | Canada  | 1984 | PKN - Tremor, rigidity, bradykinesia                                                    | 1                           | 71                                                                          | Female                                | ...                                                                    |
| Addonizio G  | Addonizio G. Rapid induction of extrapyramidal side effects with combined use of lithium and neuroleptics. J Clin Psychopharmacol 1985;5:296-8.             | US      | 1985 | PKN - Tremor, rigidity<br>PKN - Tremor, rigidity and stiffness                          | 1 (2)<br>1 (2)              | 23<br>24                                                                    | Female<br>Male                        | BD, manic with psychotic features<br>BD, manic with psychotic features |
| Dyson EH     | Dyson EH, Simpson D, Prescott LF, Proudfoot AT. Self-poisoning and therapeutic intoxication with lithium. Hum Toxicol 1987;6:325-9.                         | UK      | 1987 | PKN - Prolonged PKN, tremor, rigidity, bradykinesia                                     | 1 (28)                      | ...                                                                         | ... (22 males, 38 females, 6 unknown) | Intoxication                                                           |

Contd...

**Supplemental Table 2: Contd...**

| Main author  | Reference                                                                                                                                                | Country     | Year | Type | Number of patients reported | Age | Sex    | LTM indication             |
|--------------|----------------------------------------------------------------------------------------------------------------------------------------------------------|-------------|------|------|-----------------------------|-----|--------|----------------------------|
| Gajkowski K  | Gajkowski K, Weirkowicz-Pelczyk D, Masiak I, Rysz A. Neurologic symptoms in lithium poisoning. <i>Neurol Neurochir Pol</i> 1987;21:412-4.                | Poland      | 1987 | PKN  | 1                           | 69  | Female | BD                         |
| Chouinard G  | Chouinard G. The use of benzodiazepines in the treatment of manic-depressive illness. <i>J Clin Psychiatry</i> 1988;49 Suppl:15-20.                      | Canada      | 1988 | PKN  | 1                           | ... | ...    | ...                        |
| Sandyk R     | Sandyk R, Pardeshi R. Pyridoxine improves drug-induced Parkinsonism and psychosis in a schizophrenic patient. <i>Int J Neurosci</i> 1990;52:225-32.      | US          | 1990 | PKN  | 1                           | 42  | Male   | Schizophrenia              |
| Scappa S     | Scappa S, Teverbaugh P, Ananth J. Episodic tardive dyskinesia and Parkinsonism in bipolar disorder patients. <i>Can J Psychiatry</i> 1993;38:633-4.      | Canada      | 1993 | PKN  | 1 (3)                       | 63  | Male   | Depression, hypomania      |
| Lecamwasam D | Lecamwasam D, Synek B, Moyles K, Ghose K. Chronic lithium neurotoxicity presenting as Parkinson's disease. <i>Int Clin Psychopharmacol</i> 1994;9:127-9. | New Zealand | 1994 | PKN  | 1                           | 71  | Male   | Manic depressive psychosis |
| Holroyd S    | Holroyd S, Smith D. Disabling Parkinsonism due to lithium: A case report. <i>J Geriatr Psychiatry Neurol</i> 1995;8:118-9.                               | US          | 1995 | PKN  | 1                           | 78  | Female | Depression, hypomania      |

Contd...

**Supplemental Table 2: Contd...**

| Main author   | Reference                                                                                                                                                                                                                              | Country     | Year | Type                   | Number of patients reported | Age            | Sex                      | LTM indication           |
|---------------|----------------------------------------------------------------------------------------------------------------------------------------------------------------------------------------------------------------------------------------|-------------|------|------------------------|-----------------------------|----------------|--------------------------|--------------------------|
| Northcott C   | Northcott C, Lunn V, Yatham LN. Parkinsonism and bipolar affective disorder. <i>Can J Psychiatry</i> 1995;40:159-60.                                                                                                                   | Canada      | 1995 | PKN - Tremor, akinesia | 1                           | 66             | Male                     | Manic state              |
| Aguilar M     | Aguilar M, Valles V, Garolera M, Delgado L, Alberni J. Drug induced progressive supranuclear palsy (PSP) syndrome. <i>Mov Disord</i> 1996;11:142.                                                                                      | Spain       | 1996 | PKN - PSP syndrome     | 1                           | 46             | Male                     | BD                       |
| Jimenez F     | Jiménez-Jiménez FJ, Orti-Pareja M, Ayuso-Peralta L, Gasalla T, Cabrera-Valdivia F, Vaquero A, <i>et al.</i> Drug-induced Parkinsonism in a movement disorders unit: A four-year survey. <i>Parkinsonism Relat Disord</i> 1996;2:145-9. | Spain       | 1996 | PKN - DTN, DKN         | 1 (646)                     | ...            | ...                      | ...                      |
| Fallgatter AJ | Fallgatter AJ, Strik WK. Reversible neuropsychiatric side effects of lithium with normal serum levels. A case report. <i>Nervenarzt</i> 1997;68:586-90.                                                                                | Germany     | 1997 | PKN                    | 1                           | 56             | Female                   | Manic depressive illness |
| Wils V        | Wils V, Gölüke-Willemsse G. Extrapramidal syndrome due to valproate administration as an adjunct to lithium in an elderly manic patient. <i>Int J Geriatr Psychiatry</i> 1997;12:272.                                                  | Netherlands | 1997 | PKN                    | 1                           | 70             | Female                   | BD                       |
| Dalocchio C   | Dalocchio C, Mazzarello P. A case of Parkinsonism due to lithium intoxication: Treatment with Pramipexole. <i>J Clin Neurosci</i> 2002;9:310-1.                                                                                        | Italy       | 2002 | PKN                    | 1                           | 72             | Female                   | BD                       |
| Luby ED       | Luby ED, Singareddy RK. Long-term therapy with lithium in a private practice clinic: A naturalistic study. <i>Bipolar Disord</i> 2003;5:62-8.                                                                                          | US          | 2003 | PKN<br>PKN<br>PKN      | 1 (3)<br>1 (3)<br>1 (3)     | 74<br>78<br>89 | Female<br>Male<br>Female | BD<br>BD<br>BD           |

Contd...

**Supplemental Table 2: Contd...**

| Main author | Reference                                                                                                                                                                                                  | Country | Year | Type | Number of patients reported | Age         | Sex    | LTM indication               |
|-------------|------------------------------------------------------------------------------------------------------------------------------------------------------------------------------------------------------------|---------|------|------|-----------------------------|-------------|--------|------------------------------|
| Kaplan PW   | Kaplan PW, Birbeck G. Lithium-induced confusional states: Nonconvulsive status epilepticus or triphasic encephalopathy? <i>Epilepsia</i> 2006;47:2071-4.                                                   | US      | 2006 | PKN  | 1                           | 73          | Female | BD                           |
| Koener B    | Koener B, Hermans E, Maloteaux JM, Jean-Jean A, Constant EL. Paradoxical motor syndrome following a switch from atypical neuroleptics to aripiprazole. <i>Am J Psychiatry</i> 2007;164:1437-8.             | Belgium | 2007 | PKN  | 1                           | 54          | Female | BD                           |
| Shen HC     | Shen HC, Li JY, Lo YK. Lithium intoxication-induced acute Parkinsonism complicated with hyperparathyroidism and nephrogenic diabetes insipidus: Report of a case. <i>Acta Neurol Taiwan</i> 2007;16:231-3. | Taiwan  | 2007 | PKN  | 1                           | 67          | Female | BD                           |
| Aguilar LG  | Aguilar LG, Ondo WG. Exploring the relationship between drug-induced Parkinsonism and tardive dyskinesias. <i>Mov Disord</i> 2008;23:275.                                                                  | US      | 2008 | PKN  | 13                          | 63.2 (mean) | ...    | ...                          |
| Sarma GR    | Sarma GR, Thomas M, R AK. Drug induced reversible Parkinsonism: A report of 5 cases. <i>Mov Disord</i> 2008;23:237-8.                                                                                      | India   | 2008 | PKN  | 1                           | 72          | Male   | BD                           |
| Huang YC    | Huang YC, Lee Y, Lin P.Y. Reversible Pisa syndrome associated with switching from haloperidol to aripiprazole during lithium treatment. <i>Prog Neuropsychopharmacol Biol Psychiatry</i> 2009;33:1284-5.   | Taiwan  | 2009 | PKN  | 1                           | 46          | Female | Schizoaffective disorder, BD |

Contd...

**Supplemental Table 2: Contd...**

| Main author      | Reference                                                                                                                                                                                                                        | Country     | Year | Type                 | Number of patients reported | Age         | Sex    | LTM indication |
|------------------|----------------------------------------------------------------------------------------------------------------------------------------------------------------------------------------------------------------------------------|-------------|------|----------------------|-----------------------------|-------------|--------|----------------|
| Munhoz R         | Munhoz R, Teive H, Werneck L. Class specific manifestation in drug induced Parkinsonism: We-41. <i>Mov Disord</i> 2009;24:69.                                                                                                    | Brazil      | 2009 | PKN                  | 2                           | 66.3 (mean) | ...    | ...            |
| Walrave TRWM     | Walrave TR, Bultens C. Parkinsonism during lithium use. <i>Tijdschr Psychiatr</i> 2009;51:123-7.                                                                                                                                 | Netherlands | 2009 | PKN                  | 2                           | ...         | ...    | BD             |
| Palma JA         | Palma JA, Fernandez-Torron R, Gallego Perez-Larraya J. Extrapyramidal syndrome related to lithium-carbamazepine combination therapy at therapeutic serum levels. <i>Clin Neuropharmacol</i> 2010;33:102-3.                       | Spain       | 2010 | PKN - ATX, imbalance | 1                           | 62          | Male   | BD             |
| Shprecher D      | Shprecher D, Evans R. Dysphagia as a presenting symptom of progressive supranuclear palsy: 971. <i>Mov Disord</i> 2010;25:508.                                                                                                   | US          | 2010 | PKN                  | 1                           | 71          | Female | BD             |
| Bondon-Guitton E | Bondon-Guitton E, Perez-Lloret S, Bagheri H, Brefel C, Rascol O, Montastruc JL. Drug-induced Parkinsonism: A review of 17 years' experience in a regional pharmacovigilance center in France. <i>Mov Disord</i> 2011;26:2226-31. | France      | 2011 | PKN                  | 4                           | ...         | ...    | ...            |
| Caykoylu A       | Caykoylu A, Ekinci O, Ugurlu GK, Albayrak Y. Aripiprazole-associated bruxism, akathisia, and Parkinsonism in a bipolar patient. <i>J Clin Psychopharmacol</i> 2011;31:134-5.                                                     | Turkey      | 2011 | PKN - AKT, bruxism   | 1                           | 20          | Female | BD             |
| Mazzini L        | Mazzini L, Oggioni GD, Nasuelli N, Servo S, Testa L, Monaco F. Disabling Parkinsonism following brief exposure to lithium carbonate in amyotrophic lateral sclerosis. <i>J Neurol</i> 2011;258:333-4.                            | Italy       | 2011 | PKN - ALS            | 1                           | 46          | Male   | ALS            |

Contd...

**Supplemental Table 2: Contd...**

| Main author      | Reference                                                                                                                                                                                                                                                                 | Country | Year | Type | Number of patients reported | Age         | Sex    | LTM indication |
|------------------|---------------------------------------------------------------------------------------------------------------------------------------------------------------------------------------------------------------------------------------------------------------------------|---------|------|------|-----------------------------|-------------|--------|----------------|
| Sarna JR         | Sarna JR, Pringsheim T. Progressive supranuclear palsy-like phenotype associated with concomitant exposure to mood stabilizer and neuroleptic: 135. <i>Mov Disord</i> 2011;26:45.                                                                                         | Canada  | 2011 | PKN  | 1 (2)                       | 59          | Male   | BD             |
| Babinsky E       | Babinsky E, Levene RS. Multisystem atrophy made worse by lithium treatment in a hospice patient: A case report. <i>Am J Hosp Palliat Care</i> 2012;29:570-3.                                                                                                              | US      | 2012 | PKN  | 1                           | 65          | Male   | BD type I      |
| Bhattacharjee S  | Bhattacharjee S, Yela R, Chadwick G. Can lithium unmask the preclinical Parkinsonian features? <i>Ir Med J</i> 2013;106:254.                                                                                                                                              | Ireland | 2013 | PKN  | 1                           | 67          | Male   | BD             |
| Alonso-Canovas A | Alonso-Canovas A, Lopez-Sendon JL, DeFelipe-Mimbrera A, Matute-Lozano MC, Sainz de la Maza-Cantero S, Buisan J, <i>et al.</i> Drug induced parkinsonism: Can transcranial ultrasound predict response to withdrawal of the offending drug? <i>Mov Disord</i> 2015;29:303. | Spain   | 2014 | PKN  | 1                           | 73.5 (mean) | ...    | ...            |
| Basile G         | Basile G, Epifanio A, Mandraffino R, Trifiro G. Parkinsonism and severe hypothyroidism in an elderly patient: A case of lithium toxicity due to pharmacological interactions. <i>J Clin Pharm Ther</i> 2014;39:452-4.                                                     | Italy   | 2014 | PKN  | 1                           | 74          | Female | BD             |
| Cilia R          | Cilia R, Marotta G, Belletti A, Siri C, Pezzoli G. Reversible dopamine transporter reduction in drug-induced Parkinsonism. <i>Mov Disord</i> 2014;29:575-7.                                                                                                               | Italy   | 2014 | PKN  | 1                           | 71          | Female | BD             |

Contd...



**Supplemental Table 2: Contd...**

| Main author  | Reference                                                                                                                                                                                                                                              | Country | Year | Type                             | Number of patients reported | Age | Sex    | LTM indication |
|--------------|--------------------------------------------------------------------------------------------------------------------------------------------------------------------------------------------------------------------------------------------------------|---------|------|----------------------------------|-----------------------------|-----|--------|----------------|
| Irons R      | Irons R, Joanna B, Apurba C. The role of DaT scan in drug induced Parkinsonism: 986. <i>Mov Disord</i> 2015;30:382.                                                                                                                                    | UK      | 2015 | PKN                              | 1                           | 80  | Female | ...            |
| Vandewalle W | Vandewalle W, Boon E, Sienaert P. Movement disorders due to modern antidepressants and mood stabilizers. <i>Tijdschr Psychiatr</i> 2015;57:132-7.                                                                                                      | Belgium | 2015 | PKN                              | 2                           | ... | ...    | ...            |
| Glass OM     | Glass OM, Janjua AU, Hermida AP. Lithium-induced Parkinsonism in a bipolar patient. <i>Am J Geriatr Psychiatry</i> 2016;24:90.                                                                                                                         | US      | 2016 | PKN                              | 1                           | 65  | Female | BD             |
| Hermida AP   | Hermida AP, Janjua AU, Glass OM, Vaughan CP, Goldstein F, Trotti LM, <i>et al.</i> A case of lithium-induced Parkinsonism presenting with typical motor symptoms of Parkinson's disease in a bipolar patient. <i>Int Psychogeriatr</i> 2016;28:2101-4. | US      | 2016 | PKN                              | 1                           | 65  | Female | BD             |
| Noyce AJ     | Noyce AJ, Schrag A, Masters J, Bestwick JP, Giovannoni G, Lees AJ. Blinded video assessment of subtle Parkinsonian signs in PREDICT-PD participants: 1539. <i>Mov Disord</i> 2016;31:506.                                                              | UK      | 2016 | PKN                              | 1                           | ... | ...    | ...            |
| Kumar N      | Kumar N, Mendonça DA, Jog M. Teaching video NeuroImages: Lithium-induced reversible Pisa syndrome. <i>Neurology</i> 2017;88:e184.                                                                                                                      | US      | 2017 | PKN - DTN (Pisa syndrome)        | 1                           | 49  | Male   | BD             |
| Aikoye SA    | Aikoye SA, Parashar SD, Mann GS, Tinklepaugh M. Lithium toxicity misdiagnosed and treated as Parkinson's disease. <i>Neurol Clin Therapeut J</i> 2018;2:1-2.                                                                                           | US      | 2018 | PKN - Subacute severe reversible | 1                           | 60  | Female | BD             |

Contd...

**Supplemental Table 2: Contd...**

| Main author | Reference                                                                                                                                                                                             | Country | Year | Type                    | Number of patients reported | Age | Sex    | LTM indication   |  |
|-------------|-------------------------------------------------------------------------------------------------------------------------------------------------------------------------------------------------------|---------|------|-------------------------|-----------------------------|-----|--------|------------------|--|
| Chandana G  | Chandana G, Saijyothi D, Saranya PV, Nirmala G, Madhavi V, Ranganayakulu D. Lithium induced extrapyramidal symptoms - A Parkinson's disease in elderly patient. EC Pharmacol Toxicol 2018;6:375-7.    | India   | 2018 | PKN                     | 1                           | 70  | Male   | BD               |  |
| Cruz CC     | Cruz CC, Dafonte AA, Melero PV. Lithium Neurotoxicity: A Case Report: 1173. 31 <sup>st</sup> ECNP Congress 2018. Barcelona, Spain; 2018.                                                              | Spain   | 2018 | PKN                     | 1                           | 54  | Male   | BD               |  |
| Florescu A  | Florescu A, Whitney D, Bhatti D, Bertoni JM, Torres-Rusotto D. Paradoxical worsening of Parkinsonism upon neuroleptic withdrawal: More common than we think? Parkinsonism Relat Disord 2018;52:115-6. | US      | 2018 | PKN                     | 1                           | 68  | Male   | BD               |  |
| Yomtoob J   | Yomtoob J, Koloms K, Bega D. DAT-SPECT imaging in cases of drug-induced Parkinsonism in a specialty movement disorders practice. Parkinsonism Relat Disord 2018;53:37-41.                             | US      | 2018 | PKN                     | ...                         | ... | ...    | ...              |  |
| Shingavi S  | Shingavi S, Singaravelan RM, Bhalerao S. Use of therapeutic exercises in drug induced Parkinsonism: A case report. Int J Sci Dev Res 2019;4:537-9.                                                    | India   | 2019 | PKN - Physiotherapy     | 1                           | 62  | Male   | BD               |  |
| <b>DKN</b>  |                                                                                                                                                                                                       |         |      |                         |                             |     |        |                  |  |
| Peters HA   | Peters HA. Lithium intoxication producing chorea athetosis with recovery. Wis Med J 1949;48:1075.                                                                                                     | US      | 1949 | DKN - Choreoathetosis   | 1                           | ... | ...    | ...              |  |
| Crews EL    | Crews EL, Carpenter AE. Lithium-induced aggravation of tardive dyskinesia. Am J Psychiatry 1977;134:933.                                                                                              | US      | 1977 | DKN - Aggravation of TD | 1                           | 46  | Female | BD, maniac phase |  |

Conitd...

**Supplemental Table 2: Contd...**

| Main author   | Reference                                                                                                                                                                         | Country | Year | Type                                                   | Number of patients reported | Age          | Sex            | LTM indication                                        |
|---------------|-----------------------------------------------------------------------------------------------------------------------------------------------------------------------------------|---------|------|--------------------------------------------------------|-----------------------------|--------------|----------------|-------------------------------------------------------|
| Beitman BD    | Beitman BD. Tardive dyskinesia reinduced by lithium carbonate. Am J Psychiatry 1978;135:1229-30.                                                                                  | US      | 1978 | DKN - TD, orofacial                                    | 1                           | 56           | Female         | Recurrent depressive episodes                         |
| Stancer HC    | Stancer HC. Tardive dyskinesia not associated with neuroleptics. Am J Psychiatry 1979;136:727.                                                                                    | US      | 1979 | DKN - TD<br>DKN - TD                                   | 1 (2)<br>1 (2)              | 62<br>38     | Female<br>Male | DPS (sister was bipolar)<br>Manic-depressive disorder |
| Thomas CJ     | Thomas CJ. Brain damage with lithium/haloperidol. Br J Psychiatry 1979;134:552.                                                                                                   | England | 1979 | DKN - Orofacial                                        | 1                           | 58           | Female         | Manic-depressive psychosis                            |
| Himmelhoch JM | Himmelhoch JM, Neil JF, May SJ, Fuchs CZ, Licata SM. Age, dementia, dyskinesias, and lithium response. Am J Psychiatry 1980;137:941-5.                                            | US      | 1980 | DKN - PKN                                              | 15 (81)                     | 63.27 (mean) | ...            | BD, manic-depressive episodes                         |
| Sachdeva JR   | Sachdeva JR, Paruthi SC. Chorea-a complication of lithium. J Indian Med Assoc 1980;75:37-8.                                                                                       | India   | 1980 | DKN - Chorea                                           | 1                           | ...          | ...            | ...                                                   |
| Heim J        | Heim J, Pinel JF, Allainic H, Ferrand P, Sabouraud O, Lory Y. A case of permanent neurological sequelae by lithium intoxication during a thyrotoxicosis. Sem Hop 1981;57:1349-52. | France  | 1981 | DKN                                                    | 1                           | ...          | ...            | ...                                                   |
| Weiner WJ     | Weiner WJ, Nausieda PA, Glantz RH. Meige syndrome (blepharospasm-oromandibular dystonia) after long-term neuroleptic therapy. Neurology 1981;31:1555-6.                           | US      | 1981 | DKN - Meige-like syndrome<br>DKN - Meige-like syndrome | 1 (2)<br>1 (2)              | ...<br>...   | ...<br>...     | ...<br>Intermittent psychosis                         |
| Lieberman A   | Lieberman A, Gopinathan G. Treatment of "on-off" phenomena with lithium. Ann Neurol 1982;12:402.                                                                                  | US      | 1982 | DKN - Increase on-off phenomena of PKN                 | 1                           | 62 (mean)    | ...            | Treatment of on-off syndrome                          |
| Lewis DA      | Lewis DA. Unrecognized chronic lithium neurotoxic reactions. JAMA 1983;250:2029-30.                                                                                               | US      | 1983 | DKN                                                    | 1                           | 58           | Male           | BD                                                    |

Contd...

**Supplemental Table 2: Contd...**

| Main author         | Reference                                                                                                                                                                                                                                                                                                                       | Country | Year | Type                                                               | Number of patients reported | Age         | Sex    | LTM indication                          |
|---------------------|---------------------------------------------------------------------------------------------------------------------------------------------------------------------------------------------------------------------------------------------------------------------------------------------------------------------------------|---------|------|--------------------------------------------------------------------|-----------------------------|-------------|--------|-----------------------------------------|
| Mann SC             | Mann SC, Greenstein RA, Eilers R. Early onset of severe dyskinesia following lithium-haloperidol treatment. Am J Psychiatry 1983;140:1385-6.                                                                                                                                                                                    | US      | 1983 | DKN - Axial DTN, tics, choreoathetosis, AKT                        | 1                           | 39          | Male   | BD                                      |
| Manor E             | Manor E. A case of reversible tachy-bradycardia syndrome and permanent neurological sequelae in lithium intoxication. In: Chambers CM, Chambers PL, Gitter S, editors. Toxicology in the Use, Misuse, and Abuse of Food, Drugs, and Chemicals. Archives of Toxicology (Supplement), Vol. 6. Berlin, Heidelberg: Springer; 1983. | Israel  | 1983 | DKN                                                                | 1                           | 28          | Female | Manic depressive illness                |
| Rao AV              | Rao AV, Hariharasubramanian N, Sugumar A. A study of side effects of lithium. Indian J Psychiatry 1983;25:87-93.                                                                                                                                                                                                                | India   | 1983 | DKN                                                                | 4 (120)                     | 39.5 (mean) | ...    | BD, unipolar disorder                   |
| Standish-Barry HMAS | Standish-Barry HM, Shelly MA. Toxic neurological reaction to lithium/thioridazine. Lancet 1983;1:771.                                                                                                                                                                                                                           | England | 1983 | DKN - AKT, choreoathetosis, oromandibular DTN                      | 1                           | 45          | Female | Manic-depressive psychosis for 24 years |
| Zorumski CF         | Zorumski CF, Bakris GL. Choreoathetosis associated with lithium: Case report and literature review. Am J Psychiatry 1983;140:1621-2.                                                                                                                                                                                            | US      | 1983 | DKN - ATX, dysarthria, choreoathetosis                             | 1                           | 58          | Female | BD                                      |
| Coffey CE           | Coffey CE, Ross DR, Massey EW, Olanow CW. Dyskinesias associated with lithium therapy in Parkinsonism. Clin Neuropharmacol 1984;7:223-9.                                                                                                                                                                                        | US      | 1984 | DKN - Choreoathetosis, hemiballismus, axial DTN, oromandibular DTN | 1 (5)                       | 60          | Male   | Reduce Parkinson's akinesia (trial)     |
|                     |                                                                                                                                                                                                                                                                                                                                 |         |      | DKN - Choreoathetosis, hemiballismus, axial DTN, oromandibular DTN | 1 (5)                       | 55          | Male   | Reduce Parkinson's akinesia (trial)     |
|                     |                                                                                                                                                                                                                                                                                                                                 |         |      | DKN - Choreoathetosis, hemiballismus                               | 1 (5)                       | 37          | Female | Reduce Parkinson's akinesia (trial)     |
|                     |                                                                                                                                                                                                                                                                                                                                 |         |      | DKN - Axial DTN, choreoathetosis                                   | 1 (5)                       | 67          | Female | Reduce Parkinson's akinesia (trial)     |
|                     |                                                                                                                                                                                                                                                                                                                                 |         |      | DKN - Oromandibular DTN                                            | 1 (5)                       | 69          | Male   | Reduce Parkinson's akinesia (trial)     |

Contd...

**Supplemental Table 2: Contd...**

| Main author     | Reference                                                                                                                                                             | Country | Year | Type                      | Number of patients reported | Age            | Sex                    | LTM indication                                                                         |
|-----------------|-----------------------------------------------------------------------------------------------------------------------------------------------------------------------|---------|------|---------------------------|-----------------------------|----------------|------------------------|----------------------------------------------------------------------------------------|
| Perényi A       | Perényi A, Szücs R, Frecska E. Tardive dyskinesia in patients receiving lithium maintenance therapy. <i>Biol Psychiatry</i> 1984;19:1573-8.                           | Hungary | 1984 | DKN                       | 1                           | ...            | ...                    | ...                                                                                    |
| Campbell WG     | Campbell WG, Raskind MA, Gordon T, Shaw CM. Iron pigment in the brain of a man with tardive dyskinesia. <i>Am J Psychiatry</i> 1985;142:364-5.                        | US      | 1985 | DKN                       | 1                           | 64             | Male                   | BD                                                                                     |
| Walevski A      | Walevski A, Radwan M. Choreoathetosis as toxic effect of lithium treatment. <i>Eur Neurol</i> 1986;25:412-5.                                                          | Israel  | 1986 | DKN<br>DKN                | 1 (2)<br>1 (2)              | 62<br>73       | Female<br>Female       | Maniform psychotic state<br>BD                                                         |
| Haggerty JJ Jr. | Haggerty JJ Jr., Bentsen BS, Gillette GM. Neuroleptic malignant syndrome superimposed on tardive dyskinesia. <i>Br J Psychiatry</i> 1987;150:104-5.                   | UK      | 1987 | DKN - TD, choreoathetosis | 1                           | 30             | Male                   | Paranoid psychosis                                                                     |
| Nagaraja D      | Nagaraja D, Taly AB, Sahu RN, Channabasavanna SM, Narayanan HS. Permanent neurological sequelae due to lithium toxicity. <i>Clin Neurol Neurosurg</i> 1987;89:31-4.   | India   | 1987 | DKN<br>DKN<br>DKN         | 1 (6)<br>1 (6)<br>1 (6)     | 35<br>32<br>56 | Male<br>Female<br>Male | Manic-depressive psychosis<br>Manic-depressive psychosis<br>Manic-depressive psychosis |
| Nasrallah HA    | Nasrallah HA, Churchill CM, Hamdan-Allan GA. Higher frequency of neuroleptic-induced dystonia in mania than in schizophrenia. <i>Am J Psychiatry</i> 1988;145:1455-6. | US      | 1988 | DKN - DTN                 | 12 (46)                     | ...            | Male                   | BD                                                                                     |
| Dinan TG        | Dinan TG, Kohen D. Tardive dyskinesia in bipolar affective disorder: Relationship to lithium therapy. <i>Br J Psychiatry</i> 1989;155:55-7.                           | UK      | 1989 | DKN - TD                  | 9(40)                       | ...            | ...                    | ...                                                                                    |
| Heilmuth D      | Heilmuth D, Ljaljevic Z, Ramirez L, Meltzer HY. Choreoathetosis induced by verapamil and lithium treatment. <i>J Clin Psychopharmacol</i> 1989;9:454-5.               | US      | 1989 | DKN - Choreoathetosis     | 1                           | 66             | Male                   | BD                                                                                     |

Contd...

**Supplemental Table 2: Contd...**

| Main author  | Reference                                                                                                                                                                   | Country     | Year | Type                                                     | Number of patients reported | Age      | Sex            | LTM indication           |
|--------------|-----------------------------------------------------------------------------------------------------------------------------------------------------------------------------|-------------|------|----------------------------------------------------------|-----------------------------|----------|----------------|--------------------------|
| Matisis PP   | Matisis PP, Fisher RA, Tasman-Jones C. Acute lithium toxicity-chorea, hypercalcemia and hyperamyliaseemia. Aust N Z J Med 1989;19:718-20.                                   | New Zealand | 1989 | DKN - Choreiform movements                               | 1                           | 71       | Female         | BD                       |
| Reed SM      | Reed SM, Wise MG, Timmerman I. Choreoathetosis: A sign of lithium toxicity. J Neuropsychiatry Clin Neurosci 1989;1:57-60.                                                   | US          | 1989 | DKN - Choreoathetosis<br>DKN - Choreoathetosis           | 1 (2)<br>1 (2)              | 61<br>73 | Male<br>Male   | BD<br>BD                 |
| Sternbach H  | Sternbach H, Jordan S. Lithium-associated tardive dyskinesia. J Clin Psychopharmacol 1990;10:143-4.                                                                         | US          | 1990 | DKN - TD, oromandibular DTN                              | 1                           | 63       | Female         | Manic-depressive illness |
| Scappa S     | Scappa S, Teverbaugh P, Ananth J. Episodic tardive dyskinesia and Parkinsonism in bipolar disorder patients. Can J Psychiatry 1993;38:633-4.                                | Canada      | 1993 | DKN - PKN, choreoathetosis<br>DKN - Choreoathetosis, DTN | 1 (3)<br>1 (3)              | 41<br>29 | Male<br>Female | Mania, DPS<br>BD         |
| Lazarus A    | Lazarus A. Tardive dyskinesia-like syndrome associated with lithium and carbamazepine. J Clin Psychopharmacol 1994;14:146-7.                                                | US          | 1994 | DKN - TD, DTN, MCL                                       | 1                           | 36       | Female         | BD                       |
| Trugman JM   | Trugman JM, Leadbetter R, Zalis ME, Burgdorf RO, Wooten GF. Treatment of severe axial tardive dystonia with clozapine: Case report and hypothesis. Mov Disord 1994;9:441-6. | US          | 1994 | DKN - DTN; history of PKN, AKT                           | 1                           | 33       | Male           | Schizophrenia            |
| Podskalny GD | Podskalny GD, Factor SA. Chorea caused by lithium intoxication: A case report and literature review. Mov Disord 1996;11:733-7.                                              | US          | 1996 | DKN - Choreoathetosis, dysarthria, gait ataxia           | 1                           | 78       | Female         | BD                       |

Contd...

**Supplemental Table 2: Contd...**

| Main author        | Reference                                                                                                                                                                                         | Country | Year | Type                                    | Number of patients reported | Age | Sex    | LTM indication                         |
|--------------------|---------------------------------------------------------------------------------------------------------------------------------------------------------------------------------------------------|---------|------|-----------------------------------------|-----------------------------|-----|--------|----------------------------------------|
| Meyer-Lindenberg A | Meyer-Lindenberg A, Krausnick B. Tardive dyskinesia in a neuroleptic-naive patient with bipolar-I disorder: Persistent exacerbation after lithium intoxication. <i>Mov Disord</i> 1997;12:1108-9. | Germany | 1997 | DKN - Chorea, tremor, ATX gait          | 1                           | 72  | Female | BD type 1                              |
| Higes-Pascual F    | Higes-Pascual F, de Arriba de la Fuente G, de Pedro-Esteban F. Choreoathetosis: An uncommon sign of lithium poisoning. <i>Rev Neurol</i> 1998;26:841.                                             | Spain   | 1998 | DKN - Choreoathetosis                   | 1                           | 64  | Female | Manic-depressive, hypomania, psychosis |
| Normann C          | Normann C, Brandt C, Berger M, Walden J. Delirium and persistent dyskinesia induced by a lithium-neuroleptic interaction. <i>Pharmacopsychiatry</i> 1998;31:201-4.                                | Germany | 1998 | DKN - Choreoathetosis, PKN              | 1                           | 62  | Female | BD                                     |
| Gerding LB         | Gerding LB, Labbate LA. Use of clonazepam in an elderly bipolar patient with tardive dyskinesia: A case report. <i>Ann Clin Psychiatry</i> 1999;11:87-9.                                          | US      | 1999 | DKN - TD, choreoathetoid movements, DTN | 1                           | 81  | Male   | BD type 1                              |
| McGavin CL         | McGavin CL, John V, Musser WS. Levitracetam as a treatment for tardive dyskinesia: A case report. <i>Neurology</i> 2003;61:419.                                                                   | US      | 2003 | DKN - TD, choreic, DTN                  | 1                           | 60  | Female | Chronic DPS and borderline             |
| Stemper B          | Stemper B, Thürauf N, Neundörfer B, Heckmann JG. Choreoathetosis related to lithium intoxication. <i>Eur J Neurol</i> 2003;10:743-4.                                                              | Germany | 2003 | DKN - Choreoathetosis                   | 1                           | 76  | Female | Recurrent depressive episodes          |
| Wada K             | Wada K, Sasaki T, Yoshimura Y, Erabi H. Reversible choreoathetosis associated with lithium intoxication. <i>Seishin Shinkeigaku Zasshi</i> 2003;105:1206-12.                                      | Japan   | 2003 | DKN - Choreoathetosis                   | 1                           | 65  | Female | BD type 2                              |

Contd...

**Supplemental Table 2: Contd...**

| Main author  | Reference                                                                                                                                                                                                        | Country | Year | Type                       | Number of patients reported | Age         | Sex    | LTM indication                  |
|--------------|------------------------------------------------------------------------------------------------------------------------------------------------------------------------------------------------------------------|---------|------|----------------------------|-----------------------------|-------------|--------|---------------------------------|
| Bender S     | Bender S, Linka T, Wolstein J, Gehendges S, Paulus HJ, Schall U, <i>et al.</i> Safety and efficacy of combined clozapine-lithium pharmacotherapy. <i>Int J Neuropsychopharmacol</i> 2004;7:59-63.                | Germany | 2004 | DKN - Orofacial            | 3                           | 39.5        | ...    | ...                             |
| Mendhekar DN | Mendhekar DN, Subhash KR. Successful treatment of senile dyskinesia with risperidone. <i>Indian J Pharmacol</i> 2004;36:102.                                                                                     | India   | 2004 | DKN - Senile spontaneous   | 1                           | 72          | Male   | Severe major DPS                |
| Mendhekar DN | Mendhekar DN. Rabbit syndrome induced by combined lithium and risperidone. <i>Can J Psychiatry</i> 2005;50:369.                                                                                                  | India   | 2005 | DKN - AKT, rabbit syndrome | 1                           | 42          | Female | BD                              |
| Ozsoy S      | Ozsoy S, Basturk M, Esel E. Cerebellar syndrome in a patient with pneumonia under lithium treatment: A case report. <i>Prog Neuropsychopharmacol Biol Psychiatry</i> 2006;30:1532-4.                             | Turkey  | 2006 | DKN - Dysarthria, ATX      | 1                           | 31          | Male   | BD                              |
| Hunter CB    | Hunter CB, Kenney C, Mejia N, Davidson A, Jankovic J. Medications Associated with the Onset of Tardive Dyskinesia. <i>Baylor College of Medicine</i> ; 2008.                                                     | US      | 2008 | DKN                        | 9                           | 63.8 (mean) | ...    | ...                             |
| Lloyd RB     | Lloyd RB, Perkins RE, Schwartz AC. Choreoathetosis in the setting of lithium toxicity. <i>Psychosomatics</i> 2010;51:529-31.                                                                                     | US      | 2010 | DKN - Choreoathetosis      | 1                           | 69          | Female | Schizoaffective disorder and BD |
| Chung AK     | Chung AK. Atypical presentation of tardive dyskinesia associated with risperidone long-acting injection as maintenance treatment in bipolar affective disorder: A case report. <i>Curr Drug Saf</i> 2012;7:21-3. | China   | 2012 | DKN - Oromandibular DTN    | 1                           | 55          | Male   | BD                              |

Contd...



**Supplemental Table 2: Contd...**

| Main author   | Reference                                                                                                                                                                                                                                                              | Country   | Year | Type                             | Number of patients reported | Age | Sex    | LTM indication           |
|---------------|------------------------------------------------------------------------------------------------------------------------------------------------------------------------------------------------------------------------------------------------------------------------|-----------|------|----------------------------------|-----------------------------|-----|--------|--------------------------|
| Arambewela MH | Arambewela MH, Palangasinghe DR, Katulanda P. A patient with neuropsychiatric manifestations and thyrotoxicosis in a background of lithium toxicity. <i>Thyroid Disorders Ther</i> 2015;4:3.                                                                           | Sri Lanka | 2015 | DKN - Chorea, ATX, dysarthria    | 1                           | 70  | Male   | ...                      |
| Cobb A        | Cobb A, Messerli A, Klingeman H, Aakre C, Mohabbat AB. A rare complication of lithium toxicity. <i>Minn Med</i> 2015;98:42.                                                                                                                                            | US        | 2015 | DKN - Chorea, ATX, PKN           | 1                           | 75  | Female | BD type 1                |
| Vandewalle W  | Vandewalle W, Boon E, Sienaert P. Movement disorders due to modern antidepressants and mood stabilizers. <i>Tijdschr Psychiatr</i> 2015;57:132-7.                                                                                                                      | Belgium   | 2015 | DKN - Not specified the DKN type | 4                           | ... | ...    | ...                      |
| Amamou B      | Amamou B, Essid N, Mrad A, Mhalla A, Gaha L. Resolution of tardive dyskinesia with clozapine: A case report. <i>Dual Diagn Open Access</i> 2016;1:19.                                                                                                                  | Tunisia   | 2016 | DKN - TD, DTN                    | 1                           | 43  | Male   | BD                       |
| Huang SS      | Huang SS. Prolonged dyskinesia following lithium intoxication in an elderly patient with bipolar I disorder. <i>Kaohsiung J Med Sci</i> 2016;32:278-9.                                                                                                                 | China     | 2016 | DKN - Chorea                     | 1                           | 67  | Female | BD type I                |
| Rachamalla V  | Rachamalla V, Haq A, Song MM, Aligeti M. Clozapine-induced microseizures, orofacial dyskinesia, and speech dysfluency in an adolescent with treatment resistant early onset schizophrenia on concurrent lithium therapy. <i>Case Rep Psychiatry</i> 2017;2017:7359095. | US        | 2017 | DKN - Orofacial                  | 1                           | 16  | Male   | Schizoaffective disorder |

Contd...

**Supplemental Table 2: Contd...**

| Main author         | Reference                                                                                                                                                          | Country  | Year | Type                         | Number of patients reported | Age | Sex    | LTM indication           |  |
|---------------------|--------------------------------------------------------------------------------------------------------------------------------------------------------------------|----------|------|------------------------------|-----------------------------|-----|--------|--------------------------|--|
| Fountoulakis KN     | Fountoulakis KN, Tegos T, Kimiskidis V. Lithium monotherapy-induced tardive dyskinesia. <i>J Affect Disord</i> 2019;244:78-9.                                      | Greece   | 2019 | DKN - TD                     | 1                           | 68  | Female | BD                       |  |
| Siiva DG            | Siiva GD, Parmera JB, Haddad MS. Acute chorea: Case series from the emergency room of a Brazilian tertiary-level center. <i>Arq Neuropsiquiatr</i> 2021;79:233-7.  | Brazil   | 2020 | DKN - Chorea                 | 1                           | 61  | Female | ...                      |  |
| <b>AKT</b>          |                                                                                                                                                                    |          |      |                              |                             |     |        |                          |  |
| Loudon JB           | Loudon JB, Waring H. Toxic reactions to lithium and haloperidol. <i>Lancet</i> 1976;2:1088.                                                                        | Scotland | 1976 | AKT - Haloperidol + LTM      | 1                           | 37  | Male   | Manic-depressive illness |  |
| Channabasavanna, SM | Channabasavanna SM, Goswami U. Akathisia during lithium prophylaxis. <i>Br J Psychiatry</i> 1984;144:555-6.                                                        | India    | 1984 | AKT - PKN                    | 1                           | 52  | Male   | BD                       |  |
| Price WA            | Price WA, Zimmer B. Lithium-induced akathisia. <i>J Clin Psychiatry</i> 1987;48:81.                                                                                | US       | 1987 | AKT                          | 1                           | 66  | Female | BD                       |  |
| Zubenko GS          | Zubenko GS, Cohen BM, Lipinski JF Jr. Antidepressant-related akathisia. <i>J Clin Psychopharmacol</i> 1987;7:254-7.                                                | US       | 1987 | AKT - Trazodone + LTM        | 1                           | 63  | Male   | BD, DPS                  |  |
| Patterson JF        | Patterson JF. Lithium-induced akathisia. <i>J Clin Psychopharmacol</i> 1988;8:445.                                                                                 | US       | 1988 | AKT - Restless legs syndrome | 1                           | 54  | Male   | Manic episode            |  |
| Yassa R             | Yassa R, Groulx B. Lorazepam in the treatment of lithium-induced akathisia. <i>J Clin Psychopharmacol</i> 1989;9:70-1.                                             | Canada   | 1989 | AKT - Lorazepam therapy      | 1                           | 64  | Male   | BD                       |  |
| Poyurovsky M        | Poyurovsky M, Kreinin A, Modai I, Weizman A. Lithium-induced akathisia responds to low-dose mianserin: Case report. <i>Int Clin Psychopharmacol</i> 1995;10:261-3. | Israel   | 1995 | AKT - Mianserin therapy      | 1                           | 34  | Male   | BD                       |  |

Contd...

**Supplemental Table 2: Contd...**

| Main author  | Reference                                                                                                                                                                                     | Country | Year | Type                     | Number of patients reported | Age | Sex    | LTM indication                     |  |
|--------------|-----------------------------------------------------------------------------------------------------------------------------------------------------------------------------------------------|---------|------|--------------------------|-----------------------------|-----|--------|------------------------------------|--|
| Muthane UB   | Muthane UB, Prasad BN, Vasanth A, Satishchandra P. Tardive Parkinsonism, orofacial dyskinesia and akathisia following brief exposure to lithium carbonate. <i>J Neurol Sci</i> 2000;176:78-9. | India   | 2000 | AKT - PKN, orofacial DKN | 1                           | 65  | Female | DPS and pathological sexual desire |  |
| Scorr L      | Scorr L, Factor S. Non-tardive orofacial akathisia with dental sensory phenomenon. <i>Mov Disord</i> 2015;30:285.                                                                             | US      | 2015 | AKT - Orofacial AKT      | 1                           | 73  | Male   | BD                                 |  |
| Vandewalle W | Vandewalle W, Boon E, Sienaert P. Movement disorders due to modern antidepressants and mood stabilizers. <i>Tijdschr Psychiatr</i> 2015;57:132-7.                                             | Belgium | 2015 | AKT                      | 1                           | ... | ...    | ...                                |  |
| Demir B      | Demir B, Sancaktar M, Altindag A. Lithium-induced treatment-resistant akathisia: A case report and literature overview. <i>Clin Neuropharmacol</i> 2021;44:112-3.                             | Turkey  | 2021 | AKT                      | 1                           | 49  | Female | Maniac episode                     |  |
| <b>RLS</b>   |                                                                                                                                                                                               |         |      |                          |                             |     |        |                                    |  |
| Heiman EM    | Heiman EM, Christie M. Lithium-aggravated nocturnal myoclonus and restless legs syndrome. <i>Am J Psychiatry</i> 1986;143:1191-2.                                                             | US      | 1986 | RLS - Aggravated by LTM  | 1                           | 48  | Female | BD                                 |  |
| Terao T      | Terao T, Terao M, Yoshimura R, Abe K. Restless legs syndrome induced by lithium. <i>Biol Psychiatry</i> 1991;30:1167-70.                                                                      | Japan   | 1991 | RLS                      | 1                           | 18  | Male   | Obsessive-compulsive disorder      |  |
| Kauta S      | Kauta S, Antoniou M. An atypical case of restless legs syndrome affecting only the toes and exacerbated by lithium. <i>J Sleep Disorders Ther</i> 2013;2:1000107.                             | US      | 2013 | RLS - Aggravated by LTM  | 1                           | 51  | Female | Mood disorder                      |  |

Contd...

**Supplemental Table 2: Contd...**

| Main author    | Reference                                                                                                                                                                                                                | Country | Year | Type                   | Number of patients reported | Age | Sex    | LTM indication |
|----------------|--------------------------------------------------------------------------------------------------------------------------------------------------------------------------------------------------------------------------|---------|------|------------------------|-----------------------------|-----|--------|----------------|
| Demirci K      | Demirci K, Sert H. Does using quetiapine and lithium at the same time create restless leg syndrome? A case report. <i>Klinik Psikofarmakoloji Bulteni</i> 2014;24:149-50.                                                | Turkey  | 2014 | RLS - Quetiapine + LTM | 1                           | ... | Female | BD             |
| Chen PH        | Chen PH. Restless leg syndrome induced by escitalopram and lithium combined with quetiapine treatment in bipolar II disorder: A case report. <i>Clin Neuropharmacol</i> 2016;39:118-9.                                   | China   | 2016 | RLS - Quetiapine + LTM | 1                           | 46  | Male   | BD type 2      |
| Öhlund L       | Öhlund L, Ott M, Oja S, Bergqvist M, Lundqvist R, Sandlund M, <i>et al</i> . Reasons for lithium discontinuation in men and women with bipolar disorder: A retrospective cohort study. <i>BMC Psychiatry</i> 2018;18:37. | Sweden  | 2018 | RLS                    | 5                           | ... | ...    | BD             |
| <b>Stutter</b> |                                                                                                                                                                                                                          |         |      |                        |                             |     |        |                |
| Neitski AL     | Neitski AL, Piasecki M. Lithium-induced exacerbation of stutter. <i>Ann Pharmacother</i> 2001;35:961.                                                                                                                    | US      | 2001 | Stuttering             | 1                           | 48  | Male   | BD             |
| Gulack BC      | Gulack BC, Puri NV, Kim WJ. Stutter exacerbated by lithium in a pediatric patient with bipolar disorder. <i>Ann Pharmacother</i> 2011;45:e57.                                                                            | US      | 2011 | Stuttering             | 1                           | 10  | Male   | BD             |
| Sabillo S      | Sabillo S, Samala RV, Ciocon JO. A stuttering discovery of lithium toxicity. <i>J Am Med Dir Assoc</i> 2012;13:660-1.                                                                                                    | US      | 2012 | Stuttering             | 1                           | 86  | Female | BD             |
| <b>CJLS</b>    |                                                                                                                                                                                                                          |         |      |                        |                             |     |        |                |
| Helimchen H    | Helimchen H, Kanowski S. EEG-changes during lithium therapy. <i>Nervenarzt</i> 1971;42:144-8.                                                                                                                            | Germany | 1971 | CJLS                   | 1                           | ... | ...    | ...            |

Contd...

**Supplemental Table 2: Contd...**

| Main author  | Reference                                                                                                                                                                                 | Country     | Year | Type                           | Number of patients reported | Age        | Sex              | LTM indication |
|--------------|-------------------------------------------------------------------------------------------------------------------------------------------------------------------------------------------|-------------|------|--------------------------------|-----------------------------|------------|------------------|----------------|
| Kemperman CJ | Kemperman CJ, van Gent EM, de Rooij JA, Notermans SL. Neurotoxicity of lithium with normal lithium levels. Ned Tijdschr Geneeskd 1988;132:2066-70.                                        | Netherlands | 1988 | CJLS                           | 1                           | 72         | Female           | ...            |
| Smith SJ     | Smith SJ, Kocen RS. A Creutzfeldt-Jakob like syndrome due to lithium toxicity. J Neurol Neurosurg Psychiatry 1988;51:120-3.                                                               | UK          | 1988 | CJLS - PKN<br>CJLS - MCL       | 1 (2)<br>1 (2)              | 72<br>69   | Female<br>Female | DPS<br>DPS     |
| Broussole E  | Broussole E, Setiey A, Moene Y, Trielett M, Chazot G. Reversible Creutzfeldt-Jakob like syndrome induced by lithium plus levodopa treatment. J Neurol Neurosurg Psychiatry 1989;52:686-7. | France      | 1989 | CJLS - PKN                     | 1                           | 70         | Female           | DPS            |
| Primavera A  | Primavera A, Brusa G, Poeta MG. A Creutzfeldt-Jakob like syndrome due to lithium toxicity. J Neurol Neurosurg Psychiatry 1989;52:423.                                                     | Italy       | 1989 | CJLS<br>CJLS - Choreoathetosis | 1 (2)<br>1 (2)              | ...<br>... | ...<br>...       | ...<br>...     |
| Waldman AJ   | Waldman AJ. A Creutzfeldt-Jakob-like syndrome due to polypharmacy. South Med J 1990;83:1493.                                                                                              | US          | 1990 | CJLS - Tremor                  | 1                           | 68         | Female           | DPS            |
| Finelli PF   | Finelli PF. Drug-induced Creutzfeldt-Jakob like syndrome. J Psychiatry Neurosci 1992;17:103-5.                                                                                            | US          | 1992 | CJLS - MCL                     | 1                           | 63         | Male             | DPS            |
| Casanova B   | Casanova B, de Entrambasaguas M, Perla C, Gómez-Siurana E, Benetó A, Burguera JA. Lithium-induced Creutzfeldt-Jakob syndrome. Clin Neuropharmacol 1996;19:356-9.                          | Spain       | 1996 | CJLS - MCL, PKN                | 1                           | 67         | Male             | BD             |

Contd...

**Supplemental Table 2: Contd...**

| Main author     | Reference                                                                                                                                                                            | Country | Year | Type           | Number of patients reported | Age | Sex    | LTM indication           |
|-----------------|--------------------------------------------------------------------------------------------------------------------------------------------------------------------------------------|---------|------|----------------|-----------------------------|-----|--------|--------------------------|
| Masmoudi K      | Masmoudi K, Rosa A, Canaple S, Andriejak M. Pseudo-Creutzfeldt-Jakob syndrome with long-term lithium use. <i>Therapie</i> 1996;51:688-90.                                            | France  | 1996 | CJLS           | 1                           | ... | ...    | ...                      |
| Laasonen-Balk T | Laasonen-Balk T, Paukkala E, Koponen H. Creutzfeldt-Jacob like syndrome due to lithium intoxication. <i>Duodecim</i> 1997;113:323-5.                                                 | Finland | 1997 | CJLS           | 1                           | ... | ...    | ...                      |
| Takahashi M     | Takahashi M, Hashimoto S, Suenaga T, Nakamura M, Takahashi K. Creutzfeldt-Jacob like syndrome due to lithium intoxication - A case report. <i>Rinsho Shinkeigaku</i> 1997;37:338-40. | Japan   | 1997 | CJLS - MCL     | 1                           | 76  | Female | ...                      |
| Kikyo H         | Kikyo H, Furuikawa T. Creutzfeldt-Jacob-like syndrome induced by lithium, levomepromazine, and phenobarbitone. <i>J Neurol Neurosurg Psychiatry</i> 1999;66:802-3.                   | Japan   | 1999 | CJLS - MCL     | 1                           | 65  | Female | Manic-depressive disease |
| Slama M         | Slama M, Masmoudi K, Blanchard N, Andriejak M. A possible case of lithium intoxication mimicking Creutzfeldt-Jacob syndrome. <i>Pharmacopsychiatry</i> 2000;33:145-6.                | France  | 2000 | CJLS - MCL     | 1                           | 66  | Female | BD                       |
| Mouldi S        | Mouldi S, Le Rhun E, Gautier S, Devemy M, Destée A, Defebvre L. Lithium-induced encephalopathy mimicking Creutzfeldt-Jacob disease. <i>Rev Neurol (Paris)</i> 2006;162:1118-21.      | France  | 2006 | CJLS - MCL, CS | 1                           | 67  | Male   | BD                       |
| Isikay CT       | Işıkay CT, Yiğit A, Çelik T. Creutzfeldt-Jacob-like EEG changes in a case of fatal lithium toxicity. <i>J Neurol Sci</i> 2011;28:604-8.                                              | Turkey  | 2011 | CJLS           | 1                           | 52  | Female | BD                       |

Contd...

**Supplemental Table 2: Contd...**

| Main author        | Reference                                                                                                                                                                                                                                 | Country | Year | Type                            | Number of patients reported | Age | Sex    | LTM indication                                                                               |  |
|--------------------|-------------------------------------------------------------------------------------------------------------------------------------------------------------------------------------------------------------------------------------------|---------|------|---------------------------------|-----------------------------|-----|--------|----------------------------------------------------------------------------------------------|--|
| Kim SW             | Kim SW, Sunwoo MK, Hong JY, Lee JD, Lee PH. The perfusion pattern in a patient with lithium intoxication mimicking Creutzfeldt-Jakob disease. <i>J Clin Psychiatry</i> 2013;74:e1134-5.                                                   | Korea   | 2013 | CJLS - MCL                      | 1                           | ... | ...    | ...                                                                                          |  |
| Fernández-Torre JL | Fernández-Torre JL, Oterino A, Marcelino-Salas K, Riesco-Pérez N. Creutzfeldt-Jakob-like syndrome secondary to severe lithium intoxication: A detailed follow-up electroencephalographic study. <i>Clin Neurophysiol</i> 2014;125:2315-7. | Spain   | 2014 | CJLS - MCL, PKN                 | 1                           | 78  | Female | Schizoaffective disorder                                                                     |  |
| Madhusudhan BK     | Madhusudhan BK. Nonconvulsive status epilepticus and Creutzfeldt-Jakob-like EEG changes in a case of lithium toxicity. <i>Epilepsy Behav Case Rep</i> 2014;2:203-5.                                                                       | India   | 2014 | CJLS                            | 1                           | 63  | Female | BD                                                                                           |  |
| <b>DTN</b>         |                                                                                                                                                                                                                                           |         |      |                                 |                             |     |        |                                                                                              |  |
| Aronson TA         | Aronson TA. Persistent drug-induced Parkinsonism. <i>Biol Psychiatry</i> 1985;20:795-8.                                                                                                                                                   | US      | 1985 | DTN - LTM, haloperidol          | 1                           | 45  | Male   | DPS                                                                                          |  |
| Goetting MG        | Goetting MG. Acute lithium poisoning in a child with dystonia. <i>Pediatrics</i> 1985;76:978-80.                                                                                                                                          | US      | 1985 | DTN - Intoxication              | 1                           | 3.5 | Female | Intoxication                                                                                 |  |
| Yazici O           | Yazici O, Kantemir E, Taştaban Y, Uçok A, Özgüröglü M. Spontaneous improvement of tardive dystonia during mania. <i>Br J Psychiatry</i> 1991;158:847-50.                                                                                  | UK      | 1991 | DTN - Tardive DTN, laterocollis | 1 (2)                       | 30  | Female | Manic disorder                                                                               |  |
| Manji H            | Manji H, Howard RS, Miller DH, Hirsch NP, Carr L, Bhatia K, <i>et al.</i> Status dystonicus: The syndrome and its management. <i>Brain</i> 1998;121:243-52.                                                                               | UK      | 1991 | DTN - Tardive DTN               | 1 (2)                       | 33  | Female | Depressive syndrome (with a suicide attempt) and a paranoid component. Hypomania in the past |  |
| Manji H            | Manji H, Howard RS, Miller DH, Hirsch NP, Carr L, Bhatia K, <i>et al.</i> Status dystonicus: The syndrome and its management. <i>Brain</i> 1998;121:243-52.                                                                               | UK      | 1998 | DTN - Status dystonicus         | 1                           | 23  | Female | ...                                                                                          |  |

Contd...

**Supplemental Table 2: Contd...**

| Main author    | Reference                                                                                                                                                                                                                                                          | Country | Year | Type                                         | Number of patients reported | Age | Sex    | LTM indication                                 |
|----------------|--------------------------------------------------------------------------------------------------------------------------------------------------------------------------------------------------------------------------------------------------------------------|---------|------|----------------------------------------------|-----------------------------|-----|--------|------------------------------------------------|
| Durrenberger S | Durrenberger S, de Leon J. Acute dystonic reaction to lithium and risperidone. J Neuropsychiatry/Clin Neurosci 1999;11:518-9.                                                                                                                                      | US      | 1999 | DTN - LTM + risperidone                      | 1                           | ... | ...    | ...                                            |
| Chakrabarti S  | Chakrabarti S, Chand PK. Lithium - Induced tardive dystonia. Neurol India 2002;50:473-5.                                                                                                                                                                           | India   | 2002 | DTN - Tardive DTN, laterocollis, retrocollis | 1                           | 38  | Male   | BD                                             |
| Rosebush PI    | Rosebush PI. Tardive dystonia and its treatment. J Psychiatry Neurosci 2003;28:240.                                                                                                                                                                                | Canada  | 2003 | DTN - Tardive DTN, torticollis               | 1                           | 45  | Male   | Manic episodes                                 |
| Silva MC       | Silva MC, Ramani MK, Murthy P. Lithium withdrawal induced dystonia - A case report. Priory Psych 2003; Available from: <a href="https://www.priory.com/psych/lithdystonia.htm">https://www.priory.com/psych/lithdystonia.htm</a> . [Last accessed on 2021 Nov 23]. | India   | 2003 | DTN - Axial DTN                              | 1                           | 43  | Male   | Dementia, mood swings, behavioral disturbances |
| Oommen E       | Oommen E, Chand PK, Sharma P.S. Aripiprazole-induced tardive dystonia. Prim Care Companion J Clin Psychiatry 2006;8:378-9.                                                                                                                                         | India   | 2007 | DTN - LTM + aripiprazole                     | 1                           | 25  | Female | Schizoaffective disorder                       |
| Kwan Y         | Kwan Y, Sim K. Resolution of tardive dystonia in a patient with bipolar disorder treated with clozapine: A case report. Prog Neuropsychopharmacol Biol Psychiatry 2010;34:238-9.                                                                                   | China   | 2010 | DTN - LTM + haloperidol                      | 1                           | 34  | Male   | BD                                             |
| McLaren JL     | McLaren JL, Cauble S, Barnett RJ. Aripiprazole induced acute dystonia after discontinuation of a stimulant medication. J Clin Psychopharmacol 2010;30:77-8.                                                                                                        | Lebanon | 2010 | DTN - Oromandibular DTN                      | 1                           | 11  | Male   | BD                                             |
| Vandewalle W   | Vandewalle W, Boon E, Sienaert P. Movement disorders due to modern antidepressants and mood stabilizers. Tijdschr Psychiatr 2015;57:132-7.                                                                                                                         | Belgium | 2015 | DTN - Not specific type of DTN               | 1                           | ... | ...    | ...                                            |

Contd...



**Supplemental Table 2: Contd...**

| Main author | Reference                                                                                                                                                                                                    | Country | Year | Type                                  | Number of patients reported | Age | Sex    | LTM indication                                                                                                        |
|-------------|--------------------------------------------------------------------------------------------------------------------------------------------------------------------------------------------------------------|---------|------|---------------------------------------|-----------------------------|-----|--------|-----------------------------------------------------------------------------------------------------------------------|
| Chandar P   | Chandar P, Kulandaisamy S, Malhotra I, Kupfer Y, Shامian B, Rai AK, et al. 1749: Lithium-induced angioedema. <i>Crit Care Med</i> 2016;44:512.                                                               | US      | 2016 | DTN - Oromandibular DTN               | 1                           | 46  | Male   | DPS                                                                                                                   |
| Engel A     | Engel A, Bilbruck T, Hossain S, Leahy R. Lithium-induced acute intermittent dystonia in a patient with schizoaffective disorder. <i>Eur Psychiatry</i> 2016;33:539.                                          | US      | 2016 | DTN - Intermittent                    | 1                           | 69  | Male   | Schizoaffective disorder                                                                                              |
| Huang SY    | Huang SY, Huang MW, Tseng SY, Huang LC. Reversible Pisa syndrome related to the interaction between lithium and clotiapine: Case report. <i>Kaohsiung J Med Sci</i> 2018;34:707-8.                           | China   | 2018 | DTN - Pisa syndrome                   | 1                           | 31  | Female | BD                                                                                                                    |
| Aggarwal R  | Aggarwal R, Garg D, Dhamija RK. Lithium-induced lingual dystonia. <i>Ann Indian Acad Neurol</i> 2020;23:383-4.                                                                                               | India   | 2019 | DTN - Lingual DTN                     | 1                           | 60  | Male   | BD                                                                                                                    |
| Yildiz MÇ   | Yildiz MÇ, Arslan M, Gökçenoğlu Y, Çalıřkan AM, Çalıřkan S, Eren I. Dystonia as an unexpected interaction of ciprofloxacin and clozapine: A case report. <i>Klinik Psikofarmakoloji Bulteni</i> 2019;29:182. | Turkey  | 2019 | DTN - LTM + clozapine + ciprofloxacin | 1                           | 55  | Male   | Complaints of excessive and rapid speech, irritability, aggression, sleep disturbances, increased appetite and libido |
| Pikard JL   | Pikard JL, Oliver D, Saraceno J, Groll D. Lithium: Contributor to movement disorder sensitivity after anoxic brain injury? <i>SAGE Open Med Case Rep</i> 2019;7:2050313X18823101.                            | Canada  | 2019 | DTN - Segmental DTN                   | 1                           | 35  | Male   | BD type 1                                                                                                             |
| Chaudhari P | Chaudhari P, Karia S, Shah N, De Sousa A. Lithium induced bruxism: A case report. <i>Indian J Ment Health</i> 2020;7:384-6.                                                                                  | India   | 2020 | DTN - Bruxism                         | 1                           | 18  | Female | BD type 1                                                                                                             |

Contd...

**Supplemental Table 2: Contd...**

| Main author                | Reference                                                                                                                                                                                                                                                    | Country | Year | Type                                     | Number of patients reported | Age | Sex    | LTM indication                |
|----------------------------|--------------------------------------------------------------------------------------------------------------------------------------------------------------------------------------------------------------------------------------------------------------|---------|------|------------------------------------------|-----------------------------|-----|--------|-------------------------------|
| Hsieh H                    | Hsieh HT, Yeh YW. Dose-dependent effects of lithium treatment on the aggravation of antipsychotic-induced Pisa syndrome. Clin Neuropharmacol 2020;43:90-1.                                                                                                   | Taiwan  | 2020 | DTN - Pisa syndrome                      | 1                           | 62  | Male   | BD type 1                     |
| Kumar A                    | Kumar A, Grover S. A rare association of lithium carbonate with blepharospasm: A case report. Indian J Psychiatry 2020;62:743-5.                                                                                                                             | India   | 2020 | DTN - Blepharospasm                      | 1                           | 41  | Male   | BD                            |
| <b>Tics</b>                |                                                                                                                                                                                                                                                              |         |      |                                          |                             |     |        |                               |
| Kerbeshian J               | Kerbeshian J, Burd L. Differential responsiveness to lithium in patients with Tourette disorder. Neurosci Biobehav Rev 1988;12:247-50.                                                                                                                       | US      | 1988 | LTM worsening Tourette disorder symptoms | 5                           | 9.6 | Male   | BD                            |
| Potter PO                  | Potter PO, John N, Coffey DB. Onset of abnormal movements and cardiovascular symptoms after acute change in complex polypharmacy in a child with attention-deficit/hyperactivity disorder and mood symptoms. J Child Adolesc Psychopharmacol 2012;22:388-92. | US      | 2012 | Tic aggravated by LTM                    | 1                           | 8   | Male   | Aggressive behavior           |
| <b>Cerebellar syndrome</b> |                                                                                                                                                                                                                                                              |         |      |                                          |                             |     |        |                               |
| Nagaraja D                 | Nagaraja D, Taly AB, Sahu RN, Channabasavanna SM, Narayanan HS. Permanent neurological sequelae due to lithium toxicity. Clin Neurol Neurosurg 1987;89:31-4.                                                                                                 | India   | 1987 | Cerebellar syndrome                      | 1 (6)                       | 32  | Male   | Manic-depressive psychosis    |
|                            |                                                                                                                                                                                                                                                              |         |      | Cerebellar syndrome                      | 1 (6)                       | 33  | Female | Manic-depressive psychosis    |
|                            |                                                                                                                                                                                                                                                              |         |      | Cerebellar syndrome                      | 1 (6)                       | 41  | Male   | Manic-depressive psychosis    |
| Tesio L                    | Tesio L, Porta GL, Messa E. Cerebellar syndrome in lithium poisoning: A case of partial recovery. J Neurol Neurosurg Psychiatry 1987;50:235.                                                                                                                 | Italy   | 1987 | Cerebellar syndrome - Intoxication, coma | 1                           | 51  | Male   | Suicide attempt. Intoxication |

Contd...

**Supplemental Table 2: Contd...**

| Main author                                                                                                         | Reference                                                                                                                                                                                                                           | Country | Year | Type                               | Number of patients reported | Age       | Sex             | LTM indication                                                      |
|---------------------------------------------------------------------------------------------------------------------|-------------------------------------------------------------------------------------------------------------------------------------------------------------------------------------------------------------------------------------|---------|------|------------------------------------|-----------------------------|-----------|-----------------|---------------------------------------------------------------------|
| Yoshimoto Y                                                                                                         | Yoshimoto Y. A case of lithium intoxication with downbeat vertical nystagmus. <i>Auris Nasus Larynx</i> 1987;14:71-5.                                                                                                               | Japan   | 1987 | Cerebellar syndrome                | 1                           | 56        | Male            | Mania                                                               |
| <b>Others not clearly defined - EPSs without clearly stating other of the above, or unclear relation to lithium</b> |                                                                                                                                                                                                                                     |         |      |                                    |                             |           |                 |                                                                     |
| Shopsin B                                                                                                           | Shopsin B, Johnson G, Gershon S. Neurotoxicity with lithium: Differential drug responsiveness. <i>Int Pharmacopsychiatry</i> 1970;5:170-82.                                                                                         | US      | 1970 | EPS - Motor stereotype             | 1 (4)                       | 28        | Female          | Schizophrenic reaction, schizoaffective type, with marked elation   |
| McCaul JA                                                                                                           | McCaul JA, Stern GM. Letter: Lithium in Parkinson's disease. <i>Lancet</i> 1974;1:1117.                                                                                                                                             | England | 1974 | PKN - Does not change disabilities | 21                          | ...       | ...             | Prophylaxis against manic and depressive relapses                   |
| Gabriel E                                                                                                           | Gabriel E, Karobath M, Lenz G. The extrapyramidal symptoms in the combination of lithium long-term lithium therapy with nortriptyline. A case report on the formation of a pathogenesis hypothesis. <i>Nervenarzt</i> 1976;47:46-8. | Austria | 1976 | EPS - LTM + nortriptyline          | 1                           | ...       | ...             | ...                                                                 |
| Johnels B                                                                                                           | Johnels B, Wallin L, Wålinder J. Extrapyramidal side effects of lithium treatment. <i>Br Med J</i> 1976;2:642.                                                                                                                      | Sweden  | 1976 | EPS                                | 1 (2)                       | 57        | Female          | BD                                                                  |
| Kane J                                                                                                              | Kane J, Rifkin A, Quitkin F, Klein DF. Extrapyramidal side effects with lithium treatment. <i>Am J Psychiatry</i> 1978;135:851-3.                                                                                                   | US      | 1978 | EPS                                | 38                          | 36 (mean) | Male and Female | 36 bipolar manic-depressive patients and 2 schizoaffective patients |
| Bone S                                                                                                              | Bone S, Roose SP, Dunner DL, Fieve RR. Incidence of side effects in patients on long-term lithium therapy. <i>Am J Psychiatry</i> 1980;137:103-4.                                                                                   | US      | 1980 | EPS                                | 125                         | ...       | Male and Female | Acute mania, BD                                                     |

Contd...

**Supplemental Table 2: Contd...**

| Main author   | Reference                                                                                                                                                                                               | Country     | Year | Type                     | Number of patients reported             | Age          | Sex                 | LTM indication                                              |
|---------------|---------------------------------------------------------------------------------------------------------------------------------------------------------------------------------------------------------|-------------|------|--------------------------|-----------------------------------------|--------------|---------------------|-------------------------------------------------------------|
| Miller F      | Miller F, Menninger J, Whitcup SM. Lithium-neuroleptic neurotoxicity in the elderly bipolar patient. J Clin Psychopharmacol 1986;6:176-8.                                                               | US          | 1986 | EPS                      | 1 (3)                                   | 70           | Female              | BD, depressed type                                          |
|               |                                                                                                                                                                                                         |             |      | EPS                      | 1 (3)                                   | 70           | Female              | BD, depressed type                                          |
|               |                                                                                                                                                                                                         |             |      | EPS                      | 1 (3)                                   | 72           | Female              | BD, depressed type                                          |
| Sachdev PS    | Sachdev PS. Lithium potentiation of neuroleptic-related extrapyramidal side effects. Am J Psychiatry 1986;143:942.                                                                                      | New Zealand | 1986 | EPS - PKN                | 1                                       | 27           | Female              | Manic illness                                               |
| Miller F      | Miller F, Menninger J. Lithium-neuroleptic neurotoxicity is dose dependent. J Clin Psychopharmacol 1987;7:89-91.                                                                                        | US          | 1987 | EPS related to LTM-dose  | 6 (22) - only 6 developed neurotoxicity | Unclear      | Unclear             | BD                                                          |
| Morgenstern H | Morgenstern H, Glazer WM, Gibowski LD, Holmberg S. Predictors of tardive dyskinesia: Results of a cross-sectional study in an outpatient population. J Chronic Dis 1987;40:319-27.                      | US          | 1987 | DKN - TD                 | 12 (180)                                | 55 (mean)    | ...                 | ...                                                         |
| Addonizio G   | Addonizio G, Roth SD, Stokes PE, Stoll PM. Increased extrapyramidal symptoms with addition of lithium to neuroleptics. J Nerv Ment Dis 1988;176:682-5.                                                  | US          | 1988 | EPS                      | 10                                      | 37.2 (18-59) | 9 female and 1 male | 5 BD, 2 schizoaffective disorder, 3 schizophrenic disorders |
| Nasrallah HA  | Nasrallah HA, Churchill CM, Hamdan-Allan GA. Higher frequency of neuroleptic-induced dystonia in mania than in schizophrenia. Am J Psychiatry 1988;145:1455-6.                                          | US          | 1988 | Acute DTN                | 135                                     | ...          | ...                 | ...                                                         |
| Waddington JL | Waddington JL, Youssef HA. Tardive dyskinesia in bipolar affective disorder: Aging, cognitive dysfunction, course of illness, and exposure to neuroleptics and lithium. Am J Psychiatry 1988;145:613-6. | US          | 1988 | DKN - Prognostic factors | 25                                      | ...          | ...                 | ...                                                         |

Contd...

**Supplemental Table 2: Contd...**

| Main author   | Reference                                                                                                                                                                                            | Country     | Year | Type                                                               | Number of patients reported | Age   | Sex    | LTM indication                                                                  |
|---------------|------------------------------------------------------------------------------------------------------------------------------------------------------------------------------------------------------|-------------|------|--------------------------------------------------------------------|-----------------------------|-------|--------|---------------------------------------------------------------------------------|
| Axelsson R    | Axelsson R, Nilsson A. On the pathogenesis of abnormal involuntary movements in lithium-treated patients with major affective disorder. Eur Arch Psychiatry Clin Neurosci 1991;241:1-7.              | Sweden      | 1991 | Abnormal involuntary movements                                     | 37 Literature review        | ...   | ...    | ...                                                                             |
| Moskowitz AS  | Moskowitz AS, Alshuler L. Increased sensitivity to lithium-induced neurotoxicity after stroke: A case report. J Clin Psychopharmacol 1991;11:272-3.                                                  | US          | 1991 | Stroke symptoms worsening with LTM                                 | 1                           | 49    | Male   | BD                                                                              |
| Kohler J      | Kohler J, Mergner T, Bohle M, Neumann-Haefelin D. Neurologic complications of Q-fever ( <i>Coxiella burnetii</i> ). Fortschr Neurol Psychiatr 1992;60:110-3.                                         | Germany     | 1992 | Neurological complications associated with <i>Coxiella</i> and LTM | ...                         | ...   | ...    | ...                                                                             |
| Holroyd S     | Holroyd S, Rabins PV. A retrospective chart review of lithium side effects in a geriatric outpatient population. Am J Geriatr Psychiatry 1994;2:346-51.                                              | US          | 1994 | LTM side effects in a geriatric outpatient population              | 114                         | ...   | ...    | ...                                                                             |
| Arya DK       | Arya DK. Lithium-induced neurotoxicity at serum lithium levels within the therapeutic range. Aust N Z J Psychiatry 1996;30:871-3.                                                                    | New Zealand | 1996 | EPS - PKN                                                          | 1                           | 73    | Female | BD                                                                              |
| Ghardirian AM | Ghardirian AM, Annable L, Bélanger MC, Chouinard G. A cross-sectional study of Parkinsonism and tardive dyskinesia in lithium-treated affective disordered patients. J Clin Psychiatry 1996;57:22-8. | Canada      | 1996 | EPS                                                                | 130                         | 20-68 | ...    | 110 - BD, 18 - Unipolar (major) depression, and 2 - Atypical affective disorder |
| Tuglu C       | Tuglu C, Erdogan E, Abay E. Delirium and extrapyramidal symptoms due to a lithium-olanzapine combination therapy: A case report. J Korean Med Sci 2005;20:691-4.                                     | Turkey      | 2005 | EPS - Walking tremor in limbs                                      | 1                           | 62    | Female | BD                                                                              |

Contd...

**Supplemental Table 2: Contd...**

| Main author          | Reference                                                                                                                                                                                                                                                                    | Country | Year | Type                                                        | Number of patients reported | Age | Sex | LTM indication |
|----------------------|------------------------------------------------------------------------------------------------------------------------------------------------------------------------------------------------------------------------------------------------------------------------------|---------|------|-------------------------------------------------------------|-----------------------------|-----|-----|----------------|
| Brandt-Christensen M | Brandt-Christensen M, Kvist K, Nilsson FM, Andersen PK, Kessing LV. Treatment with antidepressants and lithium is associated with increased risk of treatment with antiparkinson drugs: A pharmacoepidemiological study. <i>J Neurol Neurosurg Psychiatry</i> 2006;77:781-3. | Denmark | 2006 | EPS                                                         | ...                         | ... | ... | ...            |
| Galpern WR           | Galpern WR. Lithium in progressive supranuclear palsy and corticobasal degeneration. <i>Mov Disord</i> 2010;25:498.                                                                                                                                                          | US      | 2010 | PKN - Corticobasal degeneration and supranuclear gaze palsy | ...                         | ... | ... | ...            |
| Lyell VR             | Lyell VR, Henderson EJ, Ahearn DJ, MacMahon DG. Multi-centre survey of new patients referred from primary care with parkinsonism- what proportion are on medications which can cause drug induced parkinsonism?: 113. <i>Mov Disord</i> 2010;25:224.                         | UK      | 2010 | PKN                                                         | ...                         | ... | ... | ...            |
| Guillan M            | Guillan M, Alonso-Canovas A, Garcia-Caldentey J, Hernandez-Medrano I, DeFelipe A, Martinez-Castrillo JC, <i>et al.</i> Inpatient movement disorders: Beware of the drugs! <i>Mov Disord</i> 2012;27:431.                                                                     | Spain   | 2012 | EPS                                                         | ...                         | ... | ... | ...            |
| Vandewalle W         | Vandewalle W, Boon E, Sienaert P. Movement disorders due to modern antidepressants and mood stabilizers. <i>Tijdschr Psychiatr</i> 2015;57:132-7.                                                                                                                            | Belgium | 2015 | General                                                     | 29                          | ... | ... | ...            |

Contd...

**Supplemental Table 2: Contd...**

| Main author       | Reference                                                                                                                                                                                                                  | Country                     | Year       | Type                            | Number of patients reported      | Age       | Sex                                                                                                                                                                                                                                                                   | LTM indication                                                                                                                                           |                                            |
|-------------------|----------------------------------------------------------------------------------------------------------------------------------------------------------------------------------------------------------------------------|-----------------------------|------------|---------------------------------|----------------------------------|-----------|-----------------------------------------------------------------------------------------------------------------------------------------------------------------------------------------------------------------------------------------------------------------------|----------------------------------------------------------------------------------------------------------------------------------------------------------|--------------------------------------------|
| Marras C          | Marras C, Herrmann N, Fischer HD, Fung K, Gruneir A, Rochon PA, <i>et al.</i> Lithium use in older adults is associated with increased prescribing of Parkinson medications. <i>Am J Geriatr Psychiatry</i> 2016;24:301-9. | Canada                      | 2016       | PKN                             | ...                              | ...       | ...                                                                                                                                                                                                                                                                   | ...                                                                                                                                                      |                                            |
| Rey <i>et al.</i> | Rey M, Molina L, Recinos B, Paz B, Rovelo M, Elias R, <i>et al.</i> Risk of movement disorders with antipsychotic drugs in patients with schizophrenia or depressive disorders: 901. <i>Mov Disord</i> 2016;31:290.        | Argentina                   | 2016       | EPS                             | ...                              | ...       | ...                                                                                                                                                                                                                                                                   | ...                                                                                                                                                      |                                            |
| Thi Truong BE     | Thi Truong BE, Sung FC, Lin CL, Hang LW, Teng YK, Tzeng YL. A follow-up study on restless legs syndrome in chronic obstructive pulmonary disease population. <i>Sleep Med</i> 2021;80:9-15.                                | Taiwan                      | 2021       | RLS                             | 7                                | ...       | ...                                                                                                                                                                                                                                                                   | ...                                                                                                                                                      |                                            |
| Main author       | Comorbidities besides LTM indication                                                                                                                                                                                       | LTM dose (mg)               | LTM levels | Time from LTM start to symptoms | Time from management to recovery | Follow-up | Important CH and CM                                                                                                                                                                                                                                                   | Neurological symptoms and clinical examination                                                                                                           | Neuroimaging - CT scan, brain MRI, and EEG |
| Coats DA          | ...                                                                                                                                                                                                                        | ...                         | 3.6 mEq/L  | ...                             | 24-48 h                          | ...       | Lost a lot of weight. Treated with IV solution containing 5% glucose and 40 mEq of potassium chloride per liter of 9% saline                                                                                                                                          | Confusion, urine and fecal incontinence, ataxia, twitches of the small muscles of the hands and face, and occasional muscular jerks of the arms and legs | ...                                        |
| ...               | ...                                                                                                                                                                                                                        | 21 mEq, 3x/ day LTM citrate | 2.9 mEq/L  | ...                             | 24-48 h                          | ...       | Symptoms started after chlorpromazine hydrochloride 75 mg 2x/day IM had been given in addition. Grossly dehydrated with poor peripheral circulation at hospital admission. Treated with IV infusions of distilled water with glucose, insulin, and potassium chloride | Drowsiness, coma, urine and fecal incontinence. Muscular twitches of forearms and legs, with fasciculation of the small muscles of the hands and face    | ...                                        |

Contd...

**Supplemental Table 2: Contd...**

| Main author | Comorbidities besides LTM indication | LTM dose (mg)                | LTM levels     | Time from LTM start to symptoms | Time from management to recovery                                                                                                                                                              | Follow-up                                    | Important CH and CM                                                                                                                                                                                | Neurological symptoms and clinical examination                                                                                                                                                                     | Neuroimaging - CT scan, brain MRI, and EEG                                                                                                                                                                                                                                              |
|-------------|--------------------------------------|------------------------------|----------------|---------------------------------|-----------------------------------------------------------------------------------------------------------------------------------------------------------------------------------------------|----------------------------------------------|----------------------------------------------------------------------------------------------------------------------------------------------------------------------------------------------------|--------------------------------------------------------------------------------------------------------------------------------------------------------------------------------------------------------------------|-----------------------------------------------------------------------------------------------------------------------------------------------------------------------------------------------------------------------------------------------------------------------------------------|
| ...         | ...                                  | 14 mEq LTM citrate 3x/day    | 3.5 mEq/L      | 6 months                        | 5 days                                                                                                                                                                                        | ...                                          | Treated with IV infusions of Darrow's solution, glucose solution (5%), and 20 units of insulin                                                                                                     | Confusion, coma, urine and fecal incontinence, no response to painful stimuli; the knee and plantar responses were weak, and she had a sluggishly reacting pupillary light reflex. Cheyne-Stokes breathing         | ...                                                                                                                                                                                                                                                                                     |
| ...         | ...                                  | 21 mEq LTM citrate, 3x/day   | 4.2 mEq/L      | ...                             | 5 days                                                                                                                                                                                        | ...                                          | Treated with 0.9% saline solution with glucose and potassium chloride                                                                                                                              | Confusion, ataxia, muscular twitching of hands and face                                                                                                                                                            | ...                                                                                                                                                                                                                                                                                     |
| ...         | ...                                  | ...                          | 4.2 mEq/L      | ...                             | 7 days                                                                                                                                                                                        | ...                                          | Main nutrition, apparently lost about 30 pounds in weight (cachectic). Prefrontal leucotomy 7 years previously, no benefit; Treatment: Oral potassium chloride, IV glucose, and Darrow's solutions | Fibrillation of the small muscles of the hands and face was present, but there were no gross jerks                                                                                                                 | ...                                                                                                                                                                                                                                                                                     |
| ...         | ...                                  | 14 mEq/L LTM citrate, 3x/day | 2.3 mEq/L      | Several months                  | 4 days                                                                                                                                                                                        | ...                                          | During a period of hot weather, she began to vomit and became ataxic, and she was sent to hospital. Treated with oral glucose (fruits), soluble insulin, and potassium chloride                    | Confusion, ataxia, fasciculation of the small muscles of the hands and face                                                                                                                                        | ...                                                                                                                                                                                                                                                                                     |
| Verbov JL   | DPS, anorexia                        | 250 mg LTM carbonate 4x/day  | 4.5 mEq/L      | 8 years                         | 80 days. On discharge, she was still euphoric, with some dysarthria, slightly ataxic gait, intention tremor of her right upper limb, equally brisk limb reflexes and normal plantar responses | Reevaluated 25 days later, further improving | Recent weight loss. Treated with IV fluid reposition according to serum electrolyte values                                                                                                         | Coma, increased limb reflexes, and an extensor left plantar response. There was no neck stiffness and fundi were normal. Lower limbs spasticity, dysarthria, ataxic gait, intention tremor of her right upper limb | Normal EEG                                                                                                                                                                                                                                                                              |
| Shopsin B   | ...                                  | 1500 mg/day                  | 0.8-1.25 mEq/L | 1 week                          | Patient was transferred to state-hospital                                                                                                                                                     | ...                                          | Medication discontinued                                                                                                                                                                            | 1 <sup>st</sup> week: Hand tremor (0.8 mEq/L)<br>2 <sup>nd</sup> week (1.25 mEq/L): Extremely hyperactive, fidgety, unable to sit still, tense, with a mask-like facies and peculiar grimacing gesticulations.     | EEG indicated bilateral cerebral dysfunction with considerable eye movement and abnormal activity. There was 2-3 cps reported, up to 50 mV waves bilaterally in the temporal regions, an increase in bilateral slow-wave alpha-activity as well as bilateral low-voltage beta activity. |



**Supplemental Table 2: Contd...**

| Main author | Comorbidities besides LTM indication | LTM dose (mg) | LTM levels | Time from LTM start to symptoms | Time from management to recovery          | Follow-up | Important CH and CM     | Neurological symptoms and clinical examination                                                                                                                                                                                                                                                                                                                               | Neuroimaging - CT scan, brain MRI, and EEG                                                                                                                                                                                                                                                                   |
|-------------|--------------------------------------|---------------|------------|---------------------------------|-------------------------------------------|-----------|-------------------------|------------------------------------------------------------------------------------------------------------------------------------------------------------------------------------------------------------------------------------------------------------------------------------------------------------------------------------------------------------------------------|--------------------------------------------------------------------------------------------------------------------------------------------------------------------------------------------------------------------------------------------------------------------------------------------------------------|
|             |                                      |               |            |                                 |                                           |           |                         | Her behavior was strange, apparently irrelevant, with hyperactive movements of her hands, arms, and head that were seemingly purposeless and nondirectional. Mild to moderate hypotonia, hyperreflexia, diffuse choreoathetotic manifestations (resembling movements of Huntington's chorea), ataxia, a positive Romberg dysdiadochokinesia, dyssynergia, and mild nystagmus | Blood LTM taken at the time of EEG was 1.1 mEq/l. Repeat-EEG revealed bilateral cerebral dysfunction; this time, the alpha and beta activity was even slower, with no countable alpha-rhythm bilaterally and extremely low-voltage beta activity on both sides. Lithemy in the morning of EEG was 1.28 mEq/L |
|             | ...                                  | 1250 mg/day   | 1.4 mEq/L  | 4 weeks                         | Patient was transferred to state hospital | ...       | Medication discontinued | After 2.5 weeks: Confusion, disorientation, drowsiness, impaired memory, cognition, and mentation. Tremor and hyperactivity disappeared, and the choreoathetotic picture dissipated significantly                                                                                                                                                                            | EEG at the end of 4 <sup>th</sup> week: Bilateral cerebral dysfunction, generalized slow wave activity                                                                                                                                                                                                       |
| Castaing R  | ...                                  | Intoxication  | ...        | ...                             | ...                                       | ...       | ...                     | Lethargy, confusion, reduced comprehension, cognitive impairment, memory loss, disorientation, slurring of speech, ataxia, dysarthria                                                                                                                                                                                                                                        | ...                                                                                                                                                                                                                                                                                                          |
| iti T       | ...                                  | ...           | ...        | ...                             | ...                                       | ...       | ...                     | ...                                                                                                                                                                                                                                                                                                                                                                          | ...                                                                                                                                                                                                                                                                                                          |

*Contd...*

**Supplemental Table 2: Contd...**

| Main author         | Comorbidities besides LTM indication | LTM dose (mg)                                               | LTM levels | Time from LTM start to symptoms | Time from management to recovery | Follow-up                                                                                                                                                                                                                                       | Important CH and CM                                                                                                               | Neurological symptoms and clinical examination                                                                                                                                                                                                                                                                                                                                                                                                                                                                                                                                                                                                                                                                                  | Neuroimaging - CT scan, brain MRI, and EEG                                                        |
|---------------------|--------------------------------------|-------------------------------------------------------------|------------|---------------------------------|----------------------------------|-------------------------------------------------------------------------------------------------------------------------------------------------------------------------------------------------------------------------------------------------|-----------------------------------------------------------------------------------------------------------------------------------|---------------------------------------------------------------------------------------------------------------------------------------------------------------------------------------------------------------------------------------------------------------------------------------------------------------------------------------------------------------------------------------------------------------------------------------------------------------------------------------------------------------------------------------------------------------------------------------------------------------------------------------------------------------------------------------------------------------------------------|---------------------------------------------------------------------------------------------------|
| Favarel-Garrigues B | ...                                  | Intoxication                                                | ...        | ...                             | ...                              | ...                                                                                                                                                                                                                                             | ...                                                                                                                               | ...                                                                                                                                                                                                                                                                                                                                                                                                                                                                                                                                                                                                                                                                                                                             | ...                                                                                               |
| Setey A             | ...                                  | ...                                                         | ...        | ...                             | ...                              | ...                                                                                                                                                                                                                                             | ...                                                                                                                               | ...                                                                                                                                                                                                                                                                                                                                                                                                                                                                                                                                                                                                                                                                                                                             | ...                                                                                               |
| Von Hartzsch B      | ...                                  | 800-2400 mg daily (mainly 1600 mg divided in 4 doses daily) | 5 mEq/L    | 1 week                          | ...                              | Reevaluated 1 year later, she was ataxic with frequent choreoathetosis movements                                                                                                                                                                | Had 3 grand mal seizures during intermission. Treated with peritoneal dialysis. Other medication: Chlorpromazine 100-200 mg daily | 4 <sup>th</sup> day: She was drowsy, nauseated, and vomiting; 5 <sup>th</sup> day: She was lethargic, ataxic, and had difficulty in walking; 7 <sup>th</sup> day: She could not sit unaided, became unresponsive, and had three grand mal seizures. She was stuporous, responding to painful stimuli only by opening her eyes and showed generalized hyperreflexia and bilateral extensor plantar responses. After peritoneal dialysis: A flapping tremor of her left hand, constant fluttering of her eyelids, pursing of her lips, and frequent involuntary movements of extrapyramidal type involving both right and left arms, bilateral nystagmus, and features suggesting some cerebellar ataxia involving the right side | An electroencephalogram, a skull X-ray picture, and a cerebrospinal fluid examination were normal |
| ...                 | ...                                  | 1600 mg daily                                               | 2.3 mEq/L  | 4 weeks                         | ...                              | 6 months later, she remained very ataxic when walking on a wide base and needed the support of two people. She had choreiform movements involving head, tongue, and limbs with a compound rhythmic tremor affecting particularly the right hand | Hemodialysis using an Ultraflo 100 coil                                                                                           | Vomit, disorientation, slurred speech, grand mal seizure, stupor, coma, hyperreflexia, and bilateral extensor plantar responses.                                                                                                                                                                                                                                                                                                                                                                                                                                                                                                                                                                                                | An electroencephalogram, a skull X-ray picture, and a cerebrospinal fluid examination were normal |

**Supplemental Table 2: Contd...**

| Main author   | Comorbidities besides LTM indication | LTM dose (mg) | LTM levels                                                         | Time from LTM start to symptoms                                     | Time from management to recovery | Follow-up                                                                                                                                                                                                                                                                                           | Important CH and CM                                                                                                                                                                                                                | Neurological symptoms and clinical examination                                                                                                  | Neuroimaging - CT scan, brain MRI, and EEG                                                                                                                                                                                                                                                                                                                   |
|---------------|--------------------------------------|---------------|--------------------------------------------------------------------|---------------------------------------------------------------------|----------------------------------|-----------------------------------------------------------------------------------------------------------------------------------------------------------------------------------------------------------------------------------------------------------------------------------------------------|------------------------------------------------------------------------------------------------------------------------------------------------------------------------------------------------------------------------------------|-------------------------------------------------------------------------------------------------------------------------------------------------|--------------------------------------------------------------------------------------------------------------------------------------------------------------------------------------------------------------------------------------------------------------------------------------------------------------------------------------------------------------|
| Juul-Jensen P | ...                                  | ...           | 5.6 mEq/L                                                          | ...                                                                 | ...                              | Neurological examination 5 years later showed dysarthria, nystagmus, ataxic knee-heel and finger-nose tests, and bilateral dysdiadochokinesia. Positional and vibrational senses were normal. Deep reflexes hyperreactive. The patient had no permanent mental after-effect of the LTM intoxication | Cardiac arrest during forced diuresis, normal activity obtained from external heart massage; She survived with severe neurological defects. Phenytoin                                                                              | Bilateral nystagmus and hyperactive deep reflexes of the extremities, normal plantar responses, grand mal seizures. Spasticity, myoclonic jerks | Coarse tremor, ataxia, muscular twitches, choreiform movements involving head, tongue, and limbs with a compound rhythmic tremor affecting particularly the right hand. Incoordination in the heel-shin test                                                                                                                                                 |
| Cohen WJ      | ...                                  | 900 mg daily  | 2.9 mEq/L                                                          | 1 week after a major gynecological operation (suffered dehydration) | 1 month                          | Up to 10 months after admission, the patient was demented, with a mask-like facies and occasional opsoclonus. Speech was dysarthric, monotonous, and low-pitched.                                                                                                                                   | On 14 <sup>th</sup> day all medications including haloperidol (45 mg/day) and benzotropine mesylate (5 mg/day) were discontinued. Haloperidol (average dosage, 45 mg/day; range, 20-70 mg/day) and benzotropine mesylate, 5 mg/day | Clouiding of consciousness, bilateral nystagmus, and rigidity. Knee-heel and finger nose tests ataxic. Tremor                                   | EEG showed an excess of bilaterally symmetrical slow-wave activity that gradually subsided during the 4 weeks following cessation of drug therapy. EEGs were normal by the 40 <sup>th</sup> day after drug treatment was withdrawn. A pneumoencephalogram showed slight dilatation of the lateral ventricles and areas of focal atrophy over the convexities |
|               |                                      | 1500 mg/day   | 11 <sup>th</sup> day: 1.37 mEq/L, 14 <sup>th</sup> day: 1.48 mEq/L | 11 days                                                             | 40 days                          |                                                                                                                                                                                                                                                                                                     |                                                                                                                                                                                                                                    |                                                                                                                                                 |                                                                                                                                                                                                                                                                                                                                                              |

Contd...

**Supplemental Table 2: Contd...**

| Main author | Comorbidities besides LTM indication | LTM dose (mg)                   | LTM levels                                                                                                                             | Time from LTM start to symptoms | Time from management to recovery                            | Follow-up                                                                                                                                                                                                    | Important CH and CM                                                                                                                                                                                                     | Neurological symptoms and clinical examination                                                                                                                                                                                                                                                                                                                                                                                                                                                                                                                                    | Neuroimaging - CT scan, brain MRI, and EEG |
|-------------|--------------------------------------|---------------------------------|----------------------------------------------------------------------------------------------------------------------------------------|---------------------------------|-------------------------------------------------------------|--------------------------------------------------------------------------------------------------------------------------------------------------------------------------------------------------------------|-------------------------------------------------------------------------------------------------------------------------------------------------------------------------------------------------------------------------|-----------------------------------------------------------------------------------------------------------------------------------------------------------------------------------------------------------------------------------------------------------------------------------------------------------------------------------------------------------------------------------------------------------------------------------------------------------------------------------------------------------------------------------------------------------------------------------|--------------------------------------------|
| ...         |                                      | 600-1800 mg/day (1.165 average) | 11 <sup>th</sup> day: 1.38 mEq/L, 13 <sup>th</sup> day: 0.81 mEq/L, 19 <sup>th</sup> day: 1.47 mEq/L, 20 <sup>th</sup> day: 1.58 mEq/L | 13 days                         | 1 week after discontinuation of LTM (27 days of intermment) | Generalized weakness, diffuse hypotonia, hyperreflexia, and a pill-rolling tremor of the upper extremities were present. Limb and truncal ataxia, dysynergia, dysdiadochokinesia, and dysmetria were notable | 13 <sup>th</sup> day: Benzotropine mesylate, 4 mg/ day, was given. 19 <sup>th</sup> day: Haloperidol and benzotropine mesylate administration was discontinued. (38°C fever) 20 <sup>th</sup> day: LTM was discontinued | On the 16 <sup>th</sup> day of treatment, tremulousness, ataxia, intention tremor, and increased rigidity were noted. By the 19 <sup>th</sup> day of LTM carbonate therapy, the patient exhibited a clouded sensorium, impaired upward gaze, generalized hyperreflexia, marked cogwheel rigidity, and a static, coarse tremor. On 27 <sup>th</sup> day: A prominent buccofacial dyskinesia, never before observed, was present, as well as gross tremor at rest. Generalized hyperreflexia, unsteady gait, cogwheel rigidity, and mild, diffuse muscle weakness were also present | EEG obtained 3 weeks later was normal      |

Contd...

**Supplemental Table 2: Contd...**

| Main author | Comorbidities besides LTM indication                                                                 | LTM dose (mg)                    | LTM levels                                                                                                                          | Time from LTM start to symptoms                                     | Time from management to recovery               | Follow-up                                                                                                                                                                                          | Important CH and CM                                                                                                                                                                                                                                                                                                                                                                     | Neurological symptoms and clinical examination                                                                                                                                                                                                                                                                                                                                                                                                                                                                                                                                                                                                                                                                                                      | Neuroimaging - CT scan, brain MRI, and EEG                                                                                                                                                                                                                          |
|-------------|------------------------------------------------------------------------------------------------------|----------------------------------|-------------------------------------------------------------------------------------------------------------------------------------|---------------------------------------------------------------------|------------------------------------------------|----------------------------------------------------------------------------------------------------------------------------------------------------------------------------------------------------|-----------------------------------------------------------------------------------------------------------------------------------------------------------------------------------------------------------------------------------------------------------------------------------------------------------------------------------------------------------------------------------------|-----------------------------------------------------------------------------------------------------------------------------------------------------------------------------------------------------------------------------------------------------------------------------------------------------------------------------------------------------------------------------------------------------------------------------------------------------------------------------------------------------------------------------------------------------------------------------------------------------------------------------------------------------------------------------------------------------------------------------------------------------|---------------------------------------------------------------------------------------------------------------------------------------------------------------------------------------------------------------------------------------------------------------------|
|             | Past diagnoses had included "manic-depressive psychosis," "schizophrenia," and "depressive neurosis" | 1800 mg/day                      | 6 <sup>th</sup> day: 2.45 mEq/L, 7 <sup>th</sup> day: 1.40 mEq/L, 8 <sup>th</sup> day: 1.29 mEq/L, 10 <sup>th</sup> day: 0.55 mEq/L | 4 days                                                              | 2 days after LTM discontinuation 9 days        | Repeated examinations during the next 6 months showed persistent tremor at rest and cogwheel rigidity in the upper extremities, buccofacial dyskinesia, and choreoathetotic movements in both feet | 4 <sup>th</sup> day, she became febrile. On day 7, all medication was discontinued (haloperidol and LTM). Previous phenothiazine therapy                                                                                                                                                                                                                                                | 4 <sup>th</sup> day: Tremor and signs of cerebellar dysfunction. 5 <sup>th</sup> day: She was obtunded, diaphoretic, and weak and tremulous. EEG obtained on the 14 <sup>th</sup> 6 <sup>th</sup> day: Pyrexia and progression of the neurologic syndrome were accompanied by an elevated WBC (13,500/cumm). Days 8-10 showed a severely dysarthric, demented, lethargic woman, exhibiting pallialia and a mask-like facies and paucity of eye movements. A postural tremor, cogwheel movements, and lead-pipe rigidity were present. 9 <sup>th</sup> day: A striking buccofacial dyskinesia and a parkinsonian tremor of both upper extremities were present, choreiform movements were observed, and the patient walked with a marche à petit pas | A waking EEG obtained on the 9 <sup>th</sup> hospital day showed a generalized excess of theta (5-7 cycles per second) activity. A waking EEG obtained on the 14 <sup>th</sup> hospital day showed definite improvement with only a slight excess of theta activity |
| Dyksen MW   | Primary hyperparathyroidism, diagnosed after starting ECT treatment day                              | 300 mg, 3x/day, then 1500 mg/day | 1.04 mEq/L                                                                                                                          | Immediately after 7 <sup>th</sup> and 10 <sup>th</sup> ECT sessions | 2 self-limited episodes lasting about 2 h each | 18 months later had no depressive or manic episodes, no mention on movement disorders                                                                                                              | Because of nausea and vomiting, LTM was discontinued after 10 days, and she was given trifluoperazine, elevated mood returned to normal over the next 3 weeks, and then, she was discharged on 50 mg fluphenazine decanoate every 2 weeks. After 10 days at home, depressive symptoms started, she was re-hospitalized 14 days after discharge, and LTM 300 mg 3x/day was reintroduced. | Psychomotor retardation, tension, and frequent periods of wakefulness during the night. Post-ECT bilateral upper limb asterixis related to primary hyperparathyroidism, during LTM treatment                                                                                                                                                                                                                                                                                                                                                                                                                                                                                                                                                        | The EEG showed generalized slowing, a pattern consistent with the presence of a metabolic encephalopathy. Skull films and a brain scan were normal                                                                                                                  |

Contd...

## Supplemental Table 2: Contd...

| Main author | Comorbidities besides LTM indication | LTM dose (mg)                                                                                                                  | LTM levels                                                    | Time from LTM start to symptoms                                       | Time from management to recovery | Follow-up | Important CH and CM                                                                                                                                                                                                                                                                                                                                                                                                                                                                                                                                         | Neurological symptoms and clinical examination                                                                                                                                                                                                                                                                       | Neuroimaging - CT scan, brain MRI, and EEG                                                                                                                                                                                                                                                                                                                                                                                                                                                                                                                                                                                                                                                                                                         |
|-------------|--------------------------------------|--------------------------------------------------------------------------------------------------------------------------------|---------------------------------------------------------------|-----------------------------------------------------------------------|----------------------------------|-----------|-------------------------------------------------------------------------------------------------------------------------------------------------------------------------------------------------------------------------------------------------------------------------------------------------------------------------------------------------------------------------------------------------------------------------------------------------------------------------------------------------------------------------------------------------------------|----------------------------------------------------------------------------------------------------------------------------------------------------------------------------------------------------------------------------------------------------------------------------------------------------------------------|----------------------------------------------------------------------------------------------------------------------------------------------------------------------------------------------------------------------------------------------------------------------------------------------------------------------------------------------------------------------------------------------------------------------------------------------------------------------------------------------------------------------------------------------------------------------------------------------------------------------------------------------------------------------------------------------------------------------------------------------------|
| Dykseen MW  | ...                                  | 900 mg/day after 2 week washout period. LTM was raised to 1800 mg/day 5 days later, due to low lithium and persistent symptoms | 0.29 mEq/L, then 1.27 mEq/L, then 0.73 mEq/L, then 0.39 mEq/L | 17 days after raising dose to 1800 mg/day, 22 days after starting LTM | 4-5 days                         | ...       | <p>After last ECT, she was referred to endocrinologist. She was discharged on thioridazine, desipramine (150 mg/day), and LTM, discontinued the two former in the following months</p> <p>Other medications: Fluphenazine, trimethobenzamide, atropine, thiopental, succinylcholine, thioridazine</p> <p>The patient was prescribed 900 mg/day LTM and 20 mg/day of haloperidol. She stopped taking her medications 3 days before hospital admission. LTM was discontinued 4 days after dose was increased, or 9 days after LTM was started in hospital</p> | Only asterixis is described                                                                                                                                                                                                                                                                                          | ...                                                                                                                                                                                                                                                                                                                                                                                                                                                                                                                                                                                                                                                                                                                                                |
| Uchigata M  | ...                                  | 1800 mg daily                                                                                                                  | 1.4 mEq/L                                                     | 4 years                                                               | ...                              | ...       | <p>Medications were stopped and infusion of normal saline and lactated Ringer's solutions was started. 3 months later, dysarthria, truncal ataxia with mild limb ataxia, vertical nystagmus, mild weakness of the extremities, diminished DTRs of the lower extremities, and decreased vibratory sense in the feet remained</p> <p>Other medications: Chlorpromazine (150 mg daily) and levomepromazine (150 mg daily)</p>                                                                                                                                  | <p>Drowsiness, dysarthria, tremor, and unsteady gait, followed by increased muscle tone, sweating, fever to 38°C, coma, rigidity, and MCL-like involuntary movement were observed in the extremities. Mitotic pupils with the absence of light reflexes. DTRs were normal in the arms and diminished in the legs</p> | <p>EEG transiently showed moderate frontal theta excess but returned to normal. NCV in the sural nerve was mildly slowed (46 m/s), but NCVs of the median and posterior tibia 1 nerves were 66 and 48 m/s, respectively. A biopsy of the left peroneal muscle showed features of neurogenic atrophy, including scattered small angulated fibers and small group atrophy associated with mild myopathic changes, i.e., central nuclei and round fibers. On histochemical examination, target fibers and type I fiber atrophy were observed. Left sural nerve biopsy disclosed mild diminution in the number of myelinated fibers, slight demyelination, and endoneurial fibrosis. Electron microscopic examination revealed some myelin figures</p> |

Contd...

**Supplemental Table 2: Contd...**

| Main author | Comorbidities besides LTM indication | LTM dose (mg)  | LTM levels | Time from LTM start to symptoms               | Time from management to recovery | Follow-up                                                                                                                                                                                                                                                                                                                                                                                                                     | Important CH and CM                                                                                                        | Neurological symptoms and clinical examination                                                                                                                                                                                                                                                                                                                                                | Neuroimaging - CT scan, brain MRI, and EEG                                                                                                                                                                                                                                                         |
|-------------|--------------------------------------|----------------|------------|-----------------------------------------------|----------------------------------|-------------------------------------------------------------------------------------------------------------------------------------------------------------------------------------------------------------------------------------------------------------------------------------------------------------------------------------------------------------------------------------------------------------------------------|----------------------------------------------------------------------------------------------------------------------------|-----------------------------------------------------------------------------------------------------------------------------------------------------------------------------------------------------------------------------------------------------------------------------------------------------------------------------------------------------------------------------------------------|----------------------------------------------------------------------------------------------------------------------------------------------------------------------------------------------------------------------------------------------------------------------------------------------------|
| Apte SN     | ...                                  | 300 mg 3x/ day | 5.7 mEq/L  | 3 days (3 h after he ingested 27 LTM tablets) | ...                              | 1½ years later: Coarse bilateral gaze-dependent nystagmus and striking ocular dysmetria were present. He exhibited scanning speech, and there was bilateral dysmetria on finger-to-nose and heel-to-shin maneuvers. Rapid alternating movements were bilaterally impaired, and he demonstrated an ataxic gait. Continuous low-amplitude choreiform and athetoid movements affected the extremities, mostly the hands and arms | Aggressive intravenous hydration, hemodialysis was initiated (4-h sessions for 4 consecutive days). CTI care was necessary | Nausea and vomiting, dehydration and oliguria, confused and had a slightly lower blood pressure (92/50 mmHg), unintelligible speech, tremor, fever and peripheral leukocytosis, mask-like facies, decerebrate posturing, deficit in recent memory, scanning speech, both truncal and appendicular ataxia, intermittent decerebrate posturing were observed. Choreiform and athetoid movements | CT scan and EEG were normal, as were the serum ceruloplasmin level and liver function tests                                                                                                                                                                                                        |
| Rosen PB    | ...                                  | ...            | >7.4 mEq/L | 1 day                                         | 2 weeks                          | ...<br>Hemodialysis. The patient was treated with clonazepam, which reduced the myoclonic activity                                                                                                                                                                                                                                                                                                                            | Hemodialysis. The patient was treated with clonazepam, which reduced the myoclonic activity                                | Psychomotor retardation and decreased DTRs. Pupils were 3 mm and sluggishly reactive to light. Corneal reflexes were intact. Deep coma and DTRs decreased, and plantar reflexes were absent. Voluntary movements of her extremities induced repetitive action MCL of the face, arms, and legs, more pronounced on the left.                                                                   | EEG demonstrated diffuse 4-5 Hz theta rhythm bilaterally with paroxysmal high-voltage spike discharges in both hemispheres, more marked on the left. A repeat EEG 6 days later showed only intermittent 5-6 Hz symmetrical theta rhythm with 8-9 Hz alpha waves present in the posterior quadrants |

Contd...

**Supplemental Table 2: Contd...**

| Main author | Comorbidities besides LTM indication               | LTM dose (mg)                         | LTM levels                               | Time from LTM start to symptoms | Time from management to recovery | Follow-up                                                                                                                                                                           | Important CH and CM                                                                                                                                                                                                                                    | Neurological symptoms and clinical examination                                                                                                                                                                                                                                                                                        | Neuroimaging - CT scan, brain MRI, and EEG                                                                                                                                                                                                                             |
|-------------|----------------------------------------------------|---------------------------------------|------------------------------------------|---------------------------------|----------------------------------|-------------------------------------------------------------------------------------------------------------------------------------------------------------------------------------|--------------------------------------------------------------------------------------------------------------------------------------------------------------------------------------------------------------------------------------------------------|---------------------------------------------------------------------------------------------------------------------------------------------------------------------------------------------------------------------------------------------------------------------------------------------------------------------------------------|------------------------------------------------------------------------------------------------------------------------------------------------------------------------------------------------------------------------------------------------------------------------|
| Sandyk R    | ...                                                | ...                                   | Not high                                 | ...                             | ...                              | ...                                                                                                                                                                                 | Leukocytosis and elevated serum enzyme, blood urea nitrogen, creatinine, and fasting blood glucose levels<br>One patient suffered widespread irreversible brain damage; the other was left with persistent dyskinesia<br>Other medication: Haloperidol | MCL also could be precipitated by passive movement of the extremities, Babinski responses bilaterally, convulsions, and coma<br>Lethargy, fever, tremulousness, confusion, and extrapyramidal and cerebellar dysfunction                                                                                                              | ...                                                                                                                                                                                                                                                                    |
| Julius SC   | Mildly mentally retarded woman                     | 1200 mg/day                           | 1.57 mEq/L;<br>0.94 mEq/L;<br>0.77 mEq/L | 5 days                          | 4 days                           | Midline epileptiform abnormalities were not present on subsequent EEGs (6 days and 3 weeks later), and she has remained seizure free for 18 months on no anticonvulsant medications | No prior history of seizures                                                                                                                                                                                                                           | On examination, she was alert and oriented. Except for mild cognitive impairment, neurological examination was otherwise unrevealing. She had four generalized tonic-clonic seizures within 2 h, which were terminated with intravenous benzodiazepines. Postictally, she was somnolent and mildly dysarthric, without focal findings | Before LTM administration, EEG showed moderate diffuse abnormalities (increased theta and delta activity). CT scan, with and without contrast, was normal. After LTM use, EEG showed nearly continuous repetitive sharp waves, maximal at the midline vertex electrode |
|             | Generalized seizures related to alcohol withdrawal | 1800 mg/day, 3 days later 1200 mg/day | 2.15 mEq/L                               | 8 days                          | 9 days                           | ...                                                                                                                                                                                 | Postpartum seizures 30 years earlier                                                                                                                                                                                                                   | DTRs were hyperactive and symmetrical, and plantar responses were extensor. General medical and neurological examinations were otherwise unremarkable                                                                                                                                                                                 | EEG 9 days after admission showed intermittent repetitive sharp waves, maximal at the midline vertex (Cz), often associated with myoclonic jerks of the legs                                                                                                           |

Contd...



## Supplemental Table 2: Contd...

| Main author | Comorbidities besides LTM indication | LTM dose (mg) | LTM levels                 | Time from LTM start to symptoms | Time from management to recovery | Follow-up                                                                                                               | Important CH and CM                                                                                                                                                                                                                                                                                                                                                                                                                                                                                                                                                                                                                                                                          | Neurological symptoms and clinical examination                                          | Neuroimaging - CT scan, brain MRI, and EEG |
|-------------|--------------------------------------|---------------|----------------------------|---------------------------------|----------------------------------|-------------------------------------------------------------------------------------------------------------------------|----------------------------------------------------------------------------------------------------------------------------------------------------------------------------------------------------------------------------------------------------------------------------------------------------------------------------------------------------------------------------------------------------------------------------------------------------------------------------------------------------------------------------------------------------------------------------------------------------------------------------------------------------------------------------------------------|-----------------------------------------------------------------------------------------|--------------------------------------------|
| Devanand DP | ...                                  | 600 mg/day    | ...                        | 6 days                          | 1 week                           | She was discharged a month later on injection fluphenazine decanoate and desipramine, and there is no recurrence of MCL | Medications at admission were imipramine 200 mg/day, haloperidol 2 mg 3 times/day, and triazolam 0.5 mg/day. After drug washout, she received 20 bilateral ECT treatments with chlorpromazine added late in the course of treatment. 3 days after ECT ended, nortriptyline was added to chlorpromazine 2400 mg/day and increased to 75 mg/day. LTM carbonate 300 mg twice a day was added to treat depression. Benztropine was added to treat EPS 3 mg/day with chlorpromazine reduced to 1600 mg/day over the next 5 days. Myoclonic jerks was observed, and LTM was stopped. MCL disappeared in the next week on desipramine 75 mg/day                                                     | MCL jerks on both upper and lower limbs with gait abnormality consistent with MCL       | EEG was normal                             |
|             | ...                                  | 900 mg/day    | 0.93 mEq/L                 | 1 week                          | ...                              | LTM was then decreased to 600 mg/day and myoclonic jerks did not occur thereafter                                       | At admission, for treatment of depression, imipramine 100 mg/day, fluphenazine 5 mg/day, and lorazepam 3 mg/day were given. She received 14 ECT with good response and then started with nortriptyline 25 mg/day and LTM carbonate 600 mg/day. Nortriptyline was increased over the next 10 days to 125 mg/day, and LTM was increased to 900 mg/day with propranolol 40 mg/day to control LTM-induced tremor. Over the next few days, myoclonic jerks of both upper and lower limbs developed. The patient reported she had similar symptoms with imipramine and LTM combined but not on imipramine alone. LTM was then decreased to 600 mg/day and myoclonic jerks did not occur thereafter | Myoclonic jerks on both upper and lower limbs with gait abnormality consistent with MCL | EEG was normal                             |
| Lemus CZ    | ...                                  | ...           | LTM toxicity was ruled out | ...                             | ...                              | After 10 months, there was no reemergence of MCL                                                                        | Clozapine and LTM combined                                                                                                                                                                                                                                                                                                                                                                                                                                                                                                                                                                                                                                                                   | Paroxysmal jerky movements of the extremities                                           | ...                                        |

Contd...

## Supplemental Table 2: Contd...

| Main author | Comorbidities besides LTM indication                                                    | LTM dose (mg)      | LTM levels                          | Time from LTM start to symptoms                     | Time from management to recovery | Follow-up                                                                                                                                                    | Important CH and CM                                                                                                                                                                                                                                                                                                                                                                                                                                                                                                                                                                                                                                                                | Neurological symptoms and clinical examination                                                                                                                                                                                                                                                                                                                                                                                                                         | Neuroimaging - CT scan, brain MRI, and EEG                                                                                                                                                                                                                                                                                                                                                                     |
|-------------|-----------------------------------------------------------------------------------------|--------------------|-------------------------------------|-----------------------------------------------------|----------------------------------|--------------------------------------------------------------------------------------------------------------------------------------------------------------|------------------------------------------------------------------------------------------------------------------------------------------------------------------------------------------------------------------------------------------------------------------------------------------------------------------------------------------------------------------------------------------------------------------------------------------------------------------------------------------------------------------------------------------------------------------------------------------------------------------------------------------------------------------------------------|------------------------------------------------------------------------------------------------------------------------------------------------------------------------------------------------------------------------------------------------------------------------------------------------------------------------------------------------------------------------------------------------------------------------------------------------------------------------|----------------------------------------------------------------------------------------------------------------------------------------------------------------------------------------------------------------------------------------------------------------------------------------------------------------------------------------------------------------------------------------------------------------|
| Simon LT    | Hypertension, diabetes, right hemiparesis from stroke                                   | 300 mg/3 times day | 0.85 mmol/L                         | Not clear - 2.5 months after starting carbamazepine | 2 days after withdrawal          | ...                                                                                                                                                          | The patient's medications at that time were LTM carbonate, 300 mg three times daily; disulfiram, 250 mg daily; and carbamazepine, 100 mg three times daily. Carbamazepine had been started 2.5 months earlier for the management of mania. He had been taking disulfiram for 8 years to treat alcoholism. When carbamazepine was withdrawn, all symptoms resolved within 2 days. The patient was discharged on LTM, 300 mg three times daily, and disulfiram, 250 mg daily, without return of symptoms. The administration of carbamazepine was temporally related to the patient's symptoms, which abated with withdrawal of carbamazepine and recurred with its readministration | Confusion, left-sided MCL, temperature of 39°C, and a diffuse erythematous maculopapular rash                                                                                                                                                                                                                                                                                                                                                                          | EEG was diffusely slow without focal or paroxysmal abnormalities                                                                                                                                                                                                                                                                                                                                               |
| Vanhooren G | Bronchopneumonia with respiratory failure, hypothyroidism, and renal diabetes insipidus | 900 mg/day         | 3.5 mEq/L (2 days after withdrawal) | ...                                                 | ...                              | 1 year after, the intoxication normal muscle strength, weak tendon reflexes, and normal sensation in arms and legs were found, but ataxia remained unchanged | Besides LTM, the patient was on levomepromazine 150 mg/day for 2 weeks. Bronchopneumonia with respiratory failure, hypothyroidism, and renal diabetes insipidus were treated. 3 weeks after admission, the patient could be weaned from the ventilator. The clinical findings did not change                                                                                                                                                                                                                                                                                                                                                                                       | Hospitalized with progressive obtundation with rigidity and fever. The days following admission, the patient became comatose. There was generalized hypertonía, bilateral Babinski sign and conjugate left-sided deviation of the eyes. Subsequently, there was right-sided hemiparesis. The plantar responses were flexor. In the following 2 weeks, the patient regained consciousness. A predominantly proximal paraparesis was noted. Tendon reflexes were normal. | EEG showed a low-voltage alpha rhythm with bilateral polymorphous delta paroxysms without lateralization. CT scan of the head did not show any abnormalities. MNCV in the peroneal, tibial, and median nerve were moderately slowed. The CMAP was of low amplitude. The SNAP of the sural nerve could not be elicited. EMG showed resting activity and polyphasic MUPs in the muscles of the lower extremities |

Contd...

**Supplemental Table 2: Contd...**

| Main author | Comorbidities besides LTM indication | LTM dose (mg) | LTM levels | Time from LTM start to symptoms | Time from management to recovery | Follow-up                                | Important CH and CM                                                                                                                                                                                                                                                                                                                                                                        | Neurological symptoms and clinical examination                                                                                                                                                                                                                                                                                                                                                                                                                                                                                                                                                                                                                   | Neuroimaging - CT scan, brain MRI, and EEG                                                                                                                                                                                                                                                                                                                                                                                                                                                                                                                                                                                                                                                                                                                                                                                                                                                                                                                                           |
|-------------|--------------------------------------|---------------|------------|---------------------------------|----------------------------------|------------------------------------------|--------------------------------------------------------------------------------------------------------------------------------------------------------------------------------------------------------------------------------------------------------------------------------------------------------------------------------------------------------------------------------------------|------------------------------------------------------------------------------------------------------------------------------------------------------------------------------------------------------------------------------------------------------------------------------------------------------------------------------------------------------------------------------------------------------------------------------------------------------------------------------------------------------------------------------------------------------------------------------------------------------------------------------------------------------------------|--------------------------------------------------------------------------------------------------------------------------------------------------------------------------------------------------------------------------------------------------------------------------------------------------------------------------------------------------------------------------------------------------------------------------------------------------------------------------------------------------------------------------------------------------------------------------------------------------------------------------------------------------------------------------------------------------------------------------------------------------------------------------------------------------------------------------------------------------------------------------------------------------------------------------------------------------------------------------------------|
| ...         | ...                                  | 1250 mg/day   | 0.75 mEq/L | 3 months                        | ...                              | 11 months later, some symptoms persisted | Because of deterioration of the mental status, haloperidol, 100 mg/day, and levomepromazine, 500 mg/day, were added to the LTM carbonate therapy from the 10 <sup>th</sup> day on and even after dose reduction of the neuroleptics, encephalopathy with generalized rigidity, hyperthermia, and leukocytosis ensued. Intubation, myorelaxation, and artificial ventilation were necessary | Further - proximal paraparesis, distal paresis of the upper extremities, generalized areflexia, severe ataxia were noted<br>Extrapyramidal rigidity and bulbar symptoms developed progressively.<br>Coma, with reaction to painful stimuli, right arm paresis, generalized hypertonia with conjugate right-sided deviation of the eyes, the thenar, hypothenar, and and oral dyskinesia were noted.<br>Generalized MCL 10 days later<br>2 weeks after intoxication, the patient regained consciousness.<br>Speech was dysarthric. Complete flaccid paralysis of the legs with areflexia and moderate asymmetric arm paresis with weak tendon reflexes were found | CT scan of the head showed no abnormalities. Needle EMG showed fibrillation potentials and PSW in all muscles examined, including paravertebral muscles. MNCV of the median, ulnar, and peroneal nerve and SNCV of the sural nerve were normal.<br>The amplitude of the CMAP of the thenar, hypothenar, and short extensor of the toes was diminished<br>At 5 months, CT scan of the head showed cerebellar, vermian atrophy. A slow increase of leg muscle strength was noted. The MNCV and SNCV were normal or slightly slowed, and the CMAP in the median and ulnar nerve had increased. 8 months after clinical diagnosis, sural nerve biopsy revealed moderate loss of myelinated fibers and mild endoneurial fibrosis. Characteristics were several clusters of small thinly myelinated axons. There were scattered vacuolated macrophages in which some myelin debris was noted electromicroscopically. A few isolated, thinly myelinated, regenerated large axons were found |

*Contd...*

**Supplemental Table 2: Contd...**

| Main author | Comorbidities besides LTM indication                                                 | LTM dose (mg)   | LTM levels  | Time from LTM start to symptoms | Time from management to recovery | Follow-up                                                                                                                                                                                                               | Important CH and CM                                                                                                                                                                                                                                                                                                                                                                                                                                                                                                                                                                                                                                                                                                                                                                                                                                                                                                                                                                                                                                                                                                                                                     | Neurological symptoms and clinical examination                            | Neuroimaging - CT scan, brain MRI, and EEG                                                      |
|-------------|--------------------------------------------------------------------------------------|-----------------|-------------|---------------------------------|----------------------------------|-------------------------------------------------------------------------------------------------------------------------------------------------------------------------------------------------------------------------|-------------------------------------------------------------------------------------------------------------------------------------------------------------------------------------------------------------------------------------------------------------------------------------------------------------------------------------------------------------------------------------------------------------------------------------------------------------------------------------------------------------------------------------------------------------------------------------------------------------------------------------------------------------------------------------------------------------------------------------------------------------------------------------------------------------------------------------------------------------------------------------------------------------------------------------------------------------------------------------------------------------------------------------------------------------------------------------------------------------------------------------------------------------------------|---------------------------------------------------------------------------|-------------------------------------------------------------------------------------------------|
| Kojima H    | Mild hypertension and mild diabetes mellitus were well controlled without medication | 600-1000 mg/day | 1.6 mEq/L   | After increased dosage of LTM   | ...                              | Thereafter, he responded well to LTM alone (600 mg/day, serum level of 1.0 mEq/L) without developing serotonin syndrome. About 7 months after admission, he was discharged with a Hamilton depression rating score of 3 | Episode of depression 2 years before, with tonic seizure. Used clomipramine, 30 mg/day, plus levomepromazine, 25 mg/day at the time, his depression did not improve sufficiently<br><br>Severely depressed when admitted (Hamilton depression rating score of 39). A regimen of clomipramine, 25 mg/day; levomepromazine, 25 mg/day; and flunitrazepam, 2 mg/day, was started. The clomipramine dose was gradually increased to 175 mg/day over a month, but the dosages of levomepromazine and flunitrazepam remained unchanged throughout this hospitalization.<br><br>Subsequently, a regimen of LTM, 600 mg/day, was added. A week later, the LTM dose was increased to 1000 mg/day. Thereafter, he suffered from MCL, shivering, tremors, incoordination, and related mood, i.e., serotonin syndrome. LTM was then discontinued, with the result that MCL, shivering, and incoordination were dramatically reduced. For the next 2 months, the clomipramine dose was gradually decreased to 50 mg/day, but there remained slight MCL, shivering, and tremor. Finally, the clomipramine regimen was discontinued, with complete remission of the serotonin syndrome | MCL, shivering, tremors, incoordination, slight dysarthria, tonic seizure | Brain MRI revealed lacunar infarction at the right basal ganglia. EEG revealed no abnormalities |
| Prettyman R | Idiopathic epilepsy (controlled on carbamazepine)                                    | 800 mg/day      | 0.55 mmol/l | 18 days                         | ...                              | ...                                                                                                                                                                                                                     | On the basis of a previously satisfactory response to LTM, he was commenced on lithium carbonate (pridel, 800 mg daily) in addition to oral (haloperidol and chlorpromazine) and depot (fluphenazine) neuroleptics which had previously been tolerated well with only mild parkinsonian side effects. LTM was subsequently discontinued and the patient's neurological status reverted to normal. 3 months later, LTM carbonate was prescribed again, this time at a dose of 400 mg daily. 4 days later, a similar pattern of neurological abnormalities were observed. Several lithium trials                                                                                                                                                                                                                                                                                                                                                                                                                                                                                                                                                                          | MCL, ataxia                                                               | Cranial CT scan was normal                                                                      |

Contd...

**Supplemental Table 2: Contd...**

| Main author       | Comorbidities besides LTM indication | LTM dose (mg)                                                                 | LTM levels  | Time from LTM start to symptoms | Time from management to recovery                          | Follow-up | Important CH and CM                                                                                                                                                                                                                                                                                                                                                 | Neurological symptoms and clinical examination                                                                                                                                                                                               | Neuroimaging - CT scan, brain MRI, and EEG |
|-------------------|--------------------------------------|-------------------------------------------------------------------------------|-------------|---------------------------------|-----------------------------------------------------------|-----------|---------------------------------------------------------------------------------------------------------------------------------------------------------------------------------------------------------------------------------------------------------------------------------------------------------------------------------------------------------------------|----------------------------------------------------------------------------------------------------------------------------------------------------------------------------------------------------------------------------------------------|--------------------------------------------|
| Rittmannsberger H | ...                                  | 1350 mg/day                                                                   | ...         | Unclear, 4 days after admission | Symptoms regressed completely after clozapine was reduced | ...       | Also used zuclopenthixol with LTM. On admission, clozapine 250 mg/day was added. Biperiden was given for the EPSs (flapping tremor)                                                                                                                                                                                                                                 | Rigor, akinesia. Unsteadiness, tremor, asterixis (flapping tremor)                                                                                                                                                                           | ...                                        |
| Loza B            | ...                                  | ...                                                                           | ...         | ...                             | ...                                                       | ...       | Serotonin syndrome in patient using fluoxetine and LTM                                                                                                                                                                                                                                                                                                              | The patient presented nearly all Sternbach's diagnostic criteria for symptoms of serotonin syndrome - Changes in mental status, restlessness, MCL, hyperreflexia, tremor, shivering, incoordination, hyperthermia, diaphoresis, and diarrhea | ...                                        |
| Nisijima K        | Serotonin syndrome                   | 400 mg/day. In early 1995, he doubled the dosage by himself taking 800 mg/day | ...         | Not specified (around 7 days)   | ...                                                       | ...       | He was on treatment of LTM 400 mg/day and trazodone 125 mg/day and also levomepromazine 20 mg and nitrazepam 10 mg to sleep. In the early May 1995, he became depressed and doubled the dosage of LTM and trazodone by himself. On May 19, he was admitted to the hospital in comatose. Further, he took trazodone and amitriptyline, dantrolene, and bromocriptine | Comatose, tremor, incoordination, muscle rigidity, hyperreflexia, delirium, MCL, diaphoresis                                                                                                                                                 | Cranial CT scan showed no abnormalities    |
| Rittmannsberger H | Severe obesity                       | 1125 mg/day                                                                   | ...         | ...                             | ...                                                       | ...       | 20 years the duration of the illness                                                                                                                                                                                                                                                                                                                                | ...                                                                                                                                                                                                                                          | Cranial CT scan mild atrophy               |
|                   | Obesity                              | 1350 mg/day                                                                   | ...         | ...                             | ...                                                       | ...       | 2 years the duration of the illness                                                                                                                                                                                                                                                                                                                                 | ...                                                                                                                                                                                                                                          | Cranial CT scan was normal                 |
|                   | Severe obesity                       | 1125 mg/day                                                                   | 1.12 mVai/L | ...                             | ...                                                       | ...       | 22 years the duration of the illness                                                                                                                                                                                                                                                                                                                                | ...                                                                                                                                                                                                                                          | Cranial CT scan was normal                 |
|                   | None                                 | 1800 mg/day                                                                   | 1.04 mVai/L | ...                             | ...                                                       | ...       | 11 years the duration of the illness                                                                                                                                                                                                                                                                                                                                | ...                                                                                                                                                                                                                                          | Cranial CT scan was normal                 |
|                   | Obesity                              | 1350 mg/day                                                                   | ...         | ...                             | ...                                                       | ...       | 20 years the duration of the illness                                                                                                                                                                                                                                                                                                                                | ...                                                                                                                                                                                                                                          | Cranial CT scan was normal                 |
|                   | Obesity                              | 675 mg/day                                                                    | ...         | ...                             | ...                                                       | ...       | 21 years was the duration of the illness                                                                                                                                                                                                                                                                                                                            | ...                                                                                                                                                                                                                                          | Cranial CT scan mild atrophy               |
|                   | None                                 | 675 mg/day                                                                    | ...         | ...                             | ...                                                       | ...       | 2 years was the duration of the illness                                                                                                                                                                                                                                                                                                                             | ...                                                                                                                                                                                                                                          | Cranial CT scan was normal                 |

Contd...

**Supplemental Table 2: Contd...**

| Main author | Comorbidities besides LTM indication                                                                                 | LTM dose (mg) | LTM levels | Time from LTM start to symptoms | Time from management to recovery | Follow-up | Important CH and CM                                                                                                                                                                                                                                                                                                                                                                                                                                                                                                                               | Neurological symptoms and clinical examination                                                                                                                                                                                                                                                                                                     | Neuroimaging - CT scan, brain MRI, and EEG                                                                                                                                                                                                                                                                                                                                                                                                                                                                                                                                                                                                                                                                                                                                                             |
|-------------|----------------------------------------------------------------------------------------------------------------------|---------------|------------|---------------------------------|----------------------------------|-----------|---------------------------------------------------------------------------------------------------------------------------------------------------------------------------------------------------------------------------------------------------------------------------------------------------------------------------------------------------------------------------------------------------------------------------------------------------------------------------------------------------------------------------------------------------|----------------------------------------------------------------------------------------------------------------------------------------------------------------------------------------------------------------------------------------------------------------------------------------------------------------------------------------------------|--------------------------------------------------------------------------------------------------------------------------------------------------------------------------------------------------------------------------------------------------------------------------------------------------------------------------------------------------------------------------------------------------------------------------------------------------------------------------------------------------------------------------------------------------------------------------------------------------------------------------------------------------------------------------------------------------------------------------------------------------------------------------------------------------------|
| Evidente VG | ...                                                                                                                  | 900 mg/day    | 0.3 mEq/L  | ...                             | ...                              | No        | He was diagnosed 13 years before presentation with bipolar disorder and had been treated with LTM (900 mg/day) and doxepin (200 mg/day) since then. 1 year before presentation, he decreased the LTM to 450 mg/day. About 6 months before presentation, the patient increased the dose of LTM to 900 mg/day, and within a few weeks, he developed shaking and jerking of the hands during activity. There was no bradykinesia, change in muscle tone, or rest tremor                                                                              | Moderately severe multidirectional myoclonic jerking of both arms was seen on sustained posture and arm movement before presentation, the patient increased the dose of LTM to 900 mg/day, and within a few weeks, he developed shaking and jerking of the hands during activity. There was no bradykinesia, change in muscle tone, or rest tremor | EEG-EMG polygraphy showed almost continuous, irregular, multifocal, short-duration (<50-100 ms) discharges in both upper extremities (most prominent in the left deltoid) during sustained arm posture and finger-to-nose testing. The myoclonic activity in the left deltoid occurred both synchronously and asynchronously with that of the other upper extremity muscles. Left median nerve SEPs were not enlarged. No exaggerated LLRs were seen. Back averaging of 216 myoclonic discharges reproduced positive-negative focal EEG transient over the contralateral sensorimotor region. EEG transient was maximal at CP4 and had a field spread to CP3, PO3, and PO4. The amplitude of the positive transient was 2.2 V from baseline and preceded the averaged EMG myoclonic discharge by 15 ms |
| Lee SH      | ...                                                                                                                  | ...           | <0.5 mEq/L | ...                             | ...                              | ...       | ...                                                                                                                                                                                                                                                                                                                                                                                                                                                                                                                                               | Ataxia, coarse tremor, MCL, facial spasm, and increased DTR                                                                                                                                                                                                                                                                                        | ...                                                                                                                                                                                                                                                                                                                                                                                                                                                                                                                                                                                                                                                                                                                                                                                                    |
| Stewart JT  | Mild vascular dementia, diabetes mellitus with peripheral neuropathy, hypertension, and benign prostatic hypertrophy | 300 mg daily  | 0.7 mEq/L  | Uncertain (<16 months)          | 2 weeks                          | ...       | Admission 16 months after LTM was introduced. The patient related that the tremor had been present for many months, clearly antedating the hip fracture, and that it interfered with his ability to eat and resulted in his frequently dropping things. There was a remote history of alcohol abuse, but he had been abstinent for 19 years. Medications included LTM carbonate 300 mg qhs, levofloxacin 50 mcg/d, clopidogrel, diltiazem, fosinopril, ranitidine, insulin, a variety of vitamins and laxatives, and oxycodone/acetaminophen prn. | Coarse, nonrhythmic, ... flapping tremor in both arms, best described as frequent momentary loss of muscle tone and clearly exacerbated by dorsiflexion of the wrists                                                                                                                                                                              | ...                                                                                                                                                                                                                                                                                                                                                                                                                                                                                                                                                                                                                                                                                                                                                                                                    |

*Contd...*

**Supplemental Table 2: Contd...**

| Main author     | Comorbidities besides LTM indication | LTM dose (mg)      | LTM levels       | Time from LTM start to symptoms | Time from management to recovery                                                            | Follow-up | Important CH and CM                                                                                                                                                                                                                                                                                                                                                                                                                                                                              | Neurological symptoms and clinical examination                                                                                                                                                             | Neuroimaging - CT scan, brain MRI, and EEG                                                                                                                                                                                |
|-----------------|--------------------------------------|--------------------|------------------|---------------------------------|---------------------------------------------------------------------------------------------|-----------|--------------------------------------------------------------------------------------------------------------------------------------------------------------------------------------------------------------------------------------------------------------------------------------------------------------------------------------------------------------------------------------------------------------------------------------------------------------------------------------------------|------------------------------------------------------------------------------------------------------------------------------------------------------------------------------------------------------------|---------------------------------------------------------------------------------------------------------------------------------------------------------------------------------------------------------------------------|
| Roccatagliata L | Hypertension                         | ...                | 0.9 mEq/L        | 2 days                          | 4 days                                                                                      | ...       | <p>Serum LTM level was 0.7 mEq/L.</p> <p>Discontinuation of oxycodone did not result in any appreciable improvement of the movement disorder. At this point, LTM was discontinued. The MD began to improve within several days and had resolved completely within 2 weeks.</p> <p>Accidental ingestion of at least 10 tablets of LTM (i.e., 3000 mg) over 2 consecutive days</p>                                                                                                                 | <p>Abrupt onset of altered mental state and postural tremor.</p> <p>Neurological status indicated confusion and decreased spontaneous speech. She became mutactic, and facial and limb MCL was evident</p> | <p>EEG performed 48 h later showed spike-wave discharges occurring every 2-4 s, consistent with continuous seizure activity. After 10 mg IV diazepam, the epileptic discharges subsided and the mental state improved</p> |
| Caviness JN     | ...                                  | 600 mg             | ...              | ...                             | ...                                                                                         | ...       | ...                                                                                                                                                                                                                                                                                                                                                                                                                                                                                              | <p>MCL</p> <p>EEG 10.0 Hz</p>                                                                                                                                                                              | ...                                                                                                                                                                                                                       |
|                 | ...                                  | 300 mg             | ...              | ...                             | ...                                                                                         | ...       | ...                                                                                                                                                                                                                                                                                                                                                                                                                                                                                              | <p>MCL</p> <p>EEG 12.0 Hz</p>                                                                                                                                                                              | ...                                                                                                                                                                                                                       |
|                 | ...                                  | 300 mg             | 1.2 mEq/L        | ...                             | 3 weeks                                                                                     | CR        | ...                                                                                                                                                                                                                                                                                                                                                                                                                                                                                              | <p>MCL</p> <p>EEG 10.0 Hz w/paroxysmal theta</p>                                                                                                                                                           | ...                                                                                                                                                                                                                       |
|                 | ...                                  | 900-1200 mg        | 1.4 mEq/L        | ...                             | 3 weeks                                                                                     | CR        | ...                                                                                                                                                                                                                                                                                                                                                                                                                                                                                              | <p>MCL</p> <p>EEG 9.0 Hz w/paroxysmal theta</p>                                                                                                                                                            | ...                                                                                                                                                                                                                       |
|                 | ...                                  | 300 mg             | 0.5 mEq/L        | ...                             | ...                                                                                         | ...       | <p>He was receiving LTM, sertraline hydrochloride, and nefazodone hydrochloride. After withdrawal of nefazodone therapy, MCL showed marked clinical improvement</p>                                                                                                                                                                                                                                                                                                                              | <p>MCL</p> <p>EEG 8.0 Hz w/paroxysmal theta</p>                                                                                                                                                            | ...                                                                                                                                                                                                                       |
| Smith D         | Diabetes mellitus type 2             | 400 mg twice daily | 0.35-2.02 mmol/L | ...                             | After three sessions of hemodialysis with a blood flow of 170 ml/min, in the following week | ...       | <p>Besides LTM, he was taking low-dose venlafaxine. Initially, he was treated for symptomatic hypoglycemia. 8 days later, he returned, having experienced confusion, anorexia, and generalized shaking for 3 days. He was judged to have symptomatic hypoglycemia and was treated with oral lucozade and a maintenance infusion of 5% dextrose. The hypoglycemic medications were stopped. Next day, his blood glucose concentrations were in the normal range, but his symptoms were worse.</p> | <p>Confusion, anorexia and generalized shaking. Drowsy, obtunded, and he had developed a coarse tremor with myoclonic jerks</p>                                                                            | <p>Cranial CT scan was normal. A transient ischemic attack was diagnosed. On readmission, repeat CT and MRI of the brain were normal. EEG showed diffuse slowing throughout the brain with no epileptiform activity</p>   |

Contd...

**Supplemental Table 2: Contd...**

| Main author | Comorbidities besides LTM indication | LTM dose (mg) | LTM levels       | Time from LTM start to symptoms | Time from management to recovery   | Follow-up                                                                                                                                                                                                                        | Important CH and CM                                                                                                                                                                                                                                                                                                                                                                                                                                                                                                                                                                                                                                                                                                                                | Neurological symptoms and clinical examination                                                     | Neuroimaging – CT scan, brain MRI, and EEG                                                                                          |
|-------------|--------------------------------------|---------------|------------------|---------------------------------|------------------------------------|----------------------------------------------------------------------------------------------------------------------------------------------------------------------------------------------------------------------------------|----------------------------------------------------------------------------------------------------------------------------------------------------------------------------------------------------------------------------------------------------------------------------------------------------------------------------------------------------------------------------------------------------------------------------------------------------------------------------------------------------------------------------------------------------------------------------------------------------------------------------------------------------------------------------------------------------------------------------------------------------|----------------------------------------------------------------------------------------------------|-------------------------------------------------------------------------------------------------------------------------------------|
| Bender S    | ...                                  | ...           | ...              | ...                             | ...                                | ...                                                                                                                                                                                                                              | <p>He was increasingly drowsy, obtunded, and abulic, and he had developed a coarse tremor with myoclonic jerks of his arms and legs. Encephalopathy secondary to LTM intoxication was diagnosed, and all his psychotropic medications were stopped. He was treated with isotonic saline as fluid replacement and with three sessions of hemodialysis with a blood flow of 170 ml/min. LTM levels fell to undetectable. His tremor and myoclonic jerks stopped, and over the following week, his toxic encephalopathy resolved</p> <p>Study that assessed the safety and efficacy of combined clozapine-LTM pharmacotherapy. Of 44 patients, 2 developed reversible MCL</p>                                                                         | ...                                                                                                | ...                                                                                                                                 |
| Reif A      | Obesity and mild diabetes mellitus   | ...           | 0.67-0.87 mmol/L | 7 days after, VPA was started   | 2 days after, VPA was discontinued | 14 days after VPA discontinuation, EEG was only slightly altered (background rhythm, 7-8 Hz) with intermittent, generalized theta waves. Another 2 weeks later, EEG was normal (basal frequency, 8-9 Hz) and similar to baseline | There was no history for head trauma or neurological disorders. He had no psychiatric history except for potentially harmful alcohol abuse. On admission, he was treated with LTM, risperidone and amitriptyline. We increased risperidone dosage to 4 mg/day, added flupentixol (10 mg) and substituted amitriptyline by clomipramine (225 mg), which slightly improved his condition. All drugs were well tolerated. As he continuously suffered from an atypical depression with persecutory delusions, a treatment attempt with VPA was initiated (day 1, 500 mg; day 2, 1000 mg; day 3 and thereafter, 2000 mg corresponding to 20 mg/kg). History of use of acarbose, amitriptyline, flupentixol, mirtazapine, risperidone, and clomipramine | Tremor and symmetric MCL of the upper extremities                                                  | EEG showed a prominent, generalized slowing with theta-/delta-rhythm (basal frequency, 2.5 Hz) during the whole recording of 13 min |
| Kaplan PW   | ...                                  | ...           | 2.8 µg/mL        | ...                             | ...                                | Returned to baseline in 3 days                                                                                                                                                                                                   | Hydration; stopped LTM. In use of haloperidol, VPA, sertraline                                                                                                                                                                                                                                                                                                                                                                                                                                                                                                                                                                                                                                                                                     | Obtunded, confused, dysarthria, mutism, rigidity, corticospinal sign/brisks reflexes, MCL twitches | EEG showed triphasic waves                                                                                                          |

Contd...



**Supplemental Table 2: Contd...**

| Main author     | Comorbidities besides LTM indication | LTM dose (mg)       | LTM levels    | Time from LTM start to symptoms             | Time from management to recovery | Follow-up                        | Important CH and CM                                                                                                                                                                                                                                                                                                                                                                                                                                                                                                                                                                         | Neurological symptoms and clinical examination                                                                                                                                                                                                                                                         | Neuroimaging - CT scan, brain MRI, and EEG                           |
|-----------------|--------------------------------------|---------------------|---------------|---------------------------------------------|----------------------------------|----------------------------------|---------------------------------------------------------------------------------------------------------------------------------------------------------------------------------------------------------------------------------------------------------------------------------------------------------------------------------------------------------------------------------------------------------------------------------------------------------------------------------------------------------------------------------------------------------------------------------------------|--------------------------------------------------------------------------------------------------------------------------------------------------------------------------------------------------------------------------------------------------------------------------------------------------------|----------------------------------------------------------------------|
| ...             | ...                                  | ...                 | 4.6 µg/mL     | ...                                         | ...                              | Recovery over 3 months           | ICU hemodialysis, lorazepam, stop LTM. In use of prolixin, VPA, aminophylline                                                                                                                                                                                                                                                                                                                                                                                                                                                                                                               | Lethargic, dysarthria, EEG showed triphasic waves<br>multism, rigidity, corticospinal sign/brisks reflexes, MCL twitches, ataxia/tremor                                                                                                                                                                | EEG showed triphasic waves                                           |
| ...             | ...                                  | ...                 | 1.5 µg/mL     | ...                                         | ...                              | Returned to baseline in 6 months | Hydration, stopped LTM. In use of perphenazine                                                                                                                                                                                                                                                                                                                                                                                                                                                                                                                                              | Drowsy, confused, dysarthria, multism, rigidity, corticospinal sign/brisks reflexes, MCL twitches, ataxia/tremor                                                                                                                                                                                       | EEG showed triphasic waves theta/delta                               |
| ...             | ...                                  | ...                 | 3.1 µg/mL     | ...                                         | ...                              | Returned to baseline in 4 months | Lorazepam, stopped LTM. In use of haloperidol                                                                                                                                                                                                                                                                                                                                                                                                                                                                                                                                               | Lethargic, unresponsive, dysarthria, multism, rigidity, corticospinal sign/brisks reflexes, MCL twitches, ataxia/tremor                                                                                                                                                                                | EEG showed triphasic waves                                           |
| ...             | ...                                  | ...                 | 2.7 µg/mL     | ...                                         | ...                              | Improved over 12 days            | Stopped LTM and treated an infection. In use of risperidone, thiothixene, and benzotropine                                                                                                                                                                                                                                                                                                                                                                                                                                                                                                  | Confused, unresponsive, hallucination                                                                                                                                                                                                                                                                  | EEG showed triphasic waves                                           |
| Grueneberger EC | ...                                  | 450-1200 mg nightly | 0.3-0.8 mEq/L | Approximately, 9 days after hospitalization | Approximately, 1 day             | ...                              | He was treated with quetiapine titrated to 600 mg/day without complications. The patient's outpatient LTM dose had been 450 mg nightly. His LTM levels on the 1 <sup>st</sup> day of the hospitalization were below therapeutic levels at 0.3 mEq/L, and his LTM was subsequently titrated to 300 mg in the morning and 600 mg at night. The patient's LTM level 5 days later was 0.5 mEq/L. The LTM dose was then increased to 1200 mg nightly. Mr. C seemed to be tolerating all medications, and his LTM levels were scheduled to be checked again 5 days after the increase to 1200 mg. | MCL, sedation, and confusion. Poverty of thought, sparse, and soft speech. Muscle fasciculation in his hands, arms, and face, which progressed to bilateral myoclonic jerks. <5 min later, the treatment team witnessed having a generalized tonic-clonic seizure that lasted for approximately 1 min. | Sleep-deprived EEG was obtained and found to be within normal limits |

Contd...

**Supplemental Table 2: Contd...**

| Main author | Comorbidities besides LTM indication | LTM dose (mg) | LTM levels  | Time from LTM start to symptoms | Time from management to recovery | Follow-up                                                                                                                                                   | Important CH and CM                                                                                                                                                                                                                                                                                                                                                                                                                                                                                                                                                                                                                                                                                                                                                                                                                                                                                                                                                                                                                                                                                                                                                                                                                                                                                                                                                                                                                                                                                                                                                               | Neurological symptoms and clinical examination                                                                                                                                                                                                                                                                                                                                         | Neuroimaging - CT scan, brain MRI, and EEG                                                   |
|-------------|--------------------------------------|---------------|-------------|---------------------------------|----------------------------------|-------------------------------------------------------------------------------------------------------------------------------------------------------------|-----------------------------------------------------------------------------------------------------------------------------------------------------------------------------------------------------------------------------------------------------------------------------------------------------------------------------------------------------------------------------------------------------------------------------------------------------------------------------------------------------------------------------------------------------------------------------------------------------------------------------------------------------------------------------------------------------------------------------------------------------------------------------------------------------------------------------------------------------------------------------------------------------------------------------------------------------------------------------------------------------------------------------------------------------------------------------------------------------------------------------------------------------------------------------------------------------------------------------------------------------------------------------------------------------------------------------------------------------------------------------------------------------------------------------------------------------------------------------------------------------------------------------------------------------------------------------------|----------------------------------------------------------------------------------------------------------------------------------------------------------------------------------------------------------------------------------------------------------------------------------------------------------------------------------------------------------------------------------------|----------------------------------------------------------------------------------------------|
| Mahasuar R  | ...                                  | ...           | 0.57 mmol/L | 6 years                         | 3 months                         | Over the next 3 months of follow-up, our patient reported a periodic fluctuation in the intensity of his symptoms but with no further sustained improvement | <p>On the 9<sup>th</sup> day of his hospitalization, Mr. C's speech became sparse and soft, he displayed poverty of thought, delayed verbal responses to questions, and appeared more disorganized than he previously had been. He suddenly began to experience muscle fasciculation in his hands, arms, and face, which progressed to bilateral myoclonic jerks. &lt;5 min later, the treatment team witnessed Mr. C having a generalized tonic-clonic seizure that lasted for approximately 1 min. He was initially unresponsive following the seizure, with blood-tinged secretions coming from his mouth. He quickly became lethargic and was arousable only to pain and auditory stimuli. He was immediately transferred to the emergency department for further evaluation. His medications were discontinued. Mr. C's LTM level after the onset of the seizure was 0.8 mEq/L. The following day, a sleep-deprived EEG was obtained and found to be within normal limits. His mental status returned to baseline alertness and orientation, but he did not recall much of the prior morning</p> <p>He had been taking a combination of LTM and carbamazepine continuously. They considered a diagnosis of tardive PT, so his LTM dosage was tapered off and then stopped. They continued his carbamazepine dosage and started him on a therapy of clonazepam at 0.25 mg twice daily. Subsequently, his visible tongue tremors were reduced in a week, and by the end of 1 month, he subjectively reported an improvement of about 60% in his tremors and clicking sound</p> | <p>He quickly became lethargic and was arousable only to pain and auditory stimuli</p> <p>Bilateral rhythmic oscillations of his soft palate associated with a clicking sound and tremors of the tongue, which were not synchronous with his palatal movements. With distraction, his tongue tremors reduced in intensity, but no obvious change in the clicking sound was noticed</p> | Brain MRI, EEG, EMG, and a laboratory work-up for Wilson's disease were within normal limits |

Contd...

**Supplemental Table 2: Contd...**

| Main author | Comorbidities besides LTM indication            | LTM dose (mg) | LTM levels  | Time from LTM start to symptoms | Time from management to recovery | Follow-up | Important CH and CM                                                                                                                                                                                                                                                                                                                                                                                                                                                                                                           | Neurological symptoms and clinical examination                                                                                                                                                                                                                                                                                                                                                                                                                                                                                                          | Neuroimaging - CT scan, brain MRI, and EEG                                                                                                                                            |
|-------------|-------------------------------------------------|---------------|-------------|---------------------------------|----------------------------------|-----------|-------------------------------------------------------------------------------------------------------------------------------------------------------------------------------------------------------------------------------------------------------------------------------------------------------------------------------------------------------------------------------------------------------------------------------------------------------------------------------------------------------------------------------|---------------------------------------------------------------------------------------------------------------------------------------------------------------------------------------------------------------------------------------------------------------------------------------------------------------------------------------------------------------------------------------------------------------------------------------------------------------------------------------------------------------------------------------------------------|---------------------------------------------------------------------------------------------------------------------------------------------------------------------------------------|
| Almeida AG  | Diabetes mellitus type 2                        | ...           | 3.1 mmol/L  | ...                             | ...                              | ...       | The patient was hydrated, and although there is an improvement trend of the serum LTM concentrations, she developed hypernatremia (160 mmol/L), hyperglycemia (400 mg/dl) and oligoanuria (6 cc/h). The neurologic status aggravated into coma, with global respiratory insufficiency and need for invasive ventilatory support                                                                                                                                                                                               | On admission: Lethargic behavior, tremor, and disorientation. After 12 days, on readmission: Diarrhea, alternating lethargic with agitated behavior, muscular rigidity, extrapyramidal tremors, dehydration, and bradycardia, aggravating to coma. 21 days after hospital admission, on the critical care unit. Neurologic examination showed depressed level of consciousness on a low diencephalic level compatible with toxic or metabolic dysfunction (vertical bilateral nystagmus and slight ocular roving, muscular hypotonia and hyporeflexion) | EEG revealed moderate diffuse sluggishness. Brain MRI excluded desmethylization syndrome. Electrocardiogram showed sinus bradycardia and prolonged QT interval with flattened T waves |
| Bakelants E | Diabetes mellitus type 2 (noninsulin dependent) | ...           | 2.09 mmol/L | ...                             | ...                              | ...       | Acute neurologic deterioration due to LTM intoxication. The woman, whose medical history included bipolar disorder and noninsulin-dependent diabetes mellitus, presented with hypoglycemia, confusion, and alternating agitation and apathy. Her current medications included LTM, diclofenac, olanzapine, sertraline, trazodone, and glibenclamide/metformin. LTM was discontinued, and the woman received saline. She gradually recovered and was discharged from the ICU. LTM was subsequently restarted at a reduced dose | Stuporous upon arrival, with a Glasgow coma scale score of 8/15. Persistent MCL of the left foot                                                                                                                                                                                                                                                                                                                                                                                                                                                        | EEG was moderately decelerated with triphasic waves                                                                                                                                   |

Contd...

## Supplemental Table 2: Contd...

| Main author | Comorbidities besides LTM indication | LTM dose (mg) | LTM levels  | Time from LTM start to symptoms                                                                                                             | Time from management to recovery                                                                                                                                             | Follow-up | Important CH and CM                                                                                                                                                                                                                                                                                                                                                                                                                                                                                                                                                                                                                                    | Neurological symptoms and clinical examination                                                                                                                                                                                                                                                                                       | Neuroimaging - CT scan, brain MRI, and EEG |
|-------------|--------------------------------------|---------------|-------------|---------------------------------------------------------------------------------------------------------------------------------------------|------------------------------------------------------------------------------------------------------------------------------------------------------------------------------|-----------|--------------------------------------------------------------------------------------------------------------------------------------------------------------------------------------------------------------------------------------------------------------------------------------------------------------------------------------------------------------------------------------------------------------------------------------------------------------------------------------------------------------------------------------------------------------------------------------------------------------------------------------------------------|--------------------------------------------------------------------------------------------------------------------------------------------------------------------------------------------------------------------------------------------------------------------------------------------------------------------------------------|--------------------------------------------|
| Chen WY     | ...                                  | 600 mg daily  | 3.43 mEq/L  | 1 day after admission, he developed irregular, slow, choreiform protruding, and twisting movements of his tongue                            | In 3 years of follow-up with medical care, he had normal neurological presentation without any involuntary movements. His serum LTM remained in the normal therapeutic range | ...       | He had a history of bipolar disorder and had been using LTM carbonate (600 mg/day) medications and sedative agents for at least 20 years. LTM carbonate was discontinued since detection of high serum LTM level                                                                                                                                                                                                                                                                                                                                                                                                                                       | He had acute conscious disturbance, atrial flutter, MCL of limbs, and orolingual DKN. Neurological examination revealed Glasgow coma scale of E2M4V2, intact cranial reflexes, four limbs symmetrical response to pain stimuli, and generalized increased DTRs. Besides, positive and negative MCL involving four limbs was observed | ...                                        |
| Mignarri A. | ...                                  | 600 mg daily  | 2.45 mmol/L | In the last 2 months, the patient was noted to have decreased cognitive function associated with worsening ataxia and involuntary movements | After LTM withdrawal, the patient was released on the 10 <sup>th</sup> day, with normal neurological examination                                                             | ...       | She had been affected by bipolar disorder since adolescence and had been receiving treatment with LTM carbonate (600 mg/day) for 15 years. Apart of the psychiatric illness, her clinical history was unremarkable. In the last 2 months, the patient was noted to have decreased cognitive function associated with worsening ATX and involuntary movements. Further, relatives referred that the patient had become distractible, dysphoric, and irritable. With the discontinuation of LTM, there was a marked normalization serum LTM levels and rapid improvement in cognitive levels function and ataxia, as well as disappearance of MCL pushes | Neurological examination revealed ideomotor apraxia, gait ATX, limb dysmetria, and hand myoclonic movements                                                                                                                                                                                                                          | ...                                        |

Contd...

## Supplemental Table 2: Contd...

| Main author   | Comorbidities besides LTM indication | LTM dose (mg)          | LTM levels | Time from LTM start to symptoms | Time from management to recovery                                                              | Follow-up                                                                                                                | Important CH and CM                                                                                                                                                                                                                                                                                                                                                                                                                                                                                                                                                                                                                                                                                                                                                                                                                                                                                                                                                                                      | Neurological symptoms and clinical examination                                        | Neuroimaging - CT scan, brain MRI, and EEG                                                                                                                                                                                                                                                                                                                                                                                                                                                                                          |
|---------------|--------------------------------------|------------------------|------------|---------------------------------|-----------------------------------------------------------------------------------------------|--------------------------------------------------------------------------------------------------------------------------|----------------------------------------------------------------------------------------------------------------------------------------------------------------------------------------------------------------------------------------------------------------------------------------------------------------------------------------------------------------------------------------------------------------------------------------------------------------------------------------------------------------------------------------------------------------------------------------------------------------------------------------------------------------------------------------------------------------------------------------------------------------------------------------------------------------------------------------------------------------------------------------------------------------------------------------------------------------------------------------------------------|---------------------------------------------------------------------------------------|-------------------------------------------------------------------------------------------------------------------------------------------------------------------------------------------------------------------------------------------------------------------------------------------------------------------------------------------------------------------------------------------------------------------------------------------------------------------------------------------------------------------------------------|
| Kitami M      | Hypertension                         | 600 mg daily           | 2.9 mEq/L  | 2 years                         | 3 weeks (not clear)                                                                           | ...                                                                                                                      | Developed ATX, tremor, and MCL. After admission, she suddenly threw up and lost consciousness; dehydration and renal dysfunction have been recognized, and serum LTM concentration was very high (2.9 mEq/L), her condition was diagnosed as having severe LTM poisoning, and her treatment with LTM was stopped. She was treated with IV crystalloids restore proper hydration and tissue perfusion. Subsequent echocardiography showed left ventricular dysfunction (its ejection fraction was reduced to 0.30) caused by apical and basal kinesia hyperkinesia (which resulted in a characteristic shape of the left ventricle, similar to round-bottomed Japanese with narrow neck "Takotsubo" pot to hold octopuses), and his condition was diagnosed as having Takotsubo's cardiomyopathy. 8 days later, we confirmed that their serum LTM concentration was not high (0.06 mEq/L). All the neurological and cardiac abnormalities disappeared in 3 weeks, and she had no manic during that period | ATX, tremor, and MCL                                                                  | The results of brain MRI and cerebrospinal fluid investigations were normal. EEG demonstrated diffuse slowing                                                                                                                                                                                                                                                                                                                                                                                                                       |
| Fitzgerald RT | Hypertension, hypothyroidism         | LTM ER 3-4 times daily | >4 mEq/L   | ...                             | On day 33 of hospitalization, the patient had returned to baseline and was discharged to home | Subsequent brain MRI, 5 months later, the patient showed complete resolution of parenchymal signal abnormalities of PRES | On arrival, the patient was hypoxic (pulse oximetry 80%-85%) and subsequently intubated. Medicines at the time of admission included: Clonazepam QD (unknown dose), quetiapine 300 mg QD, gabapentin 200 mg QD, LTM ER 3-4 times a day, levothyroxine 0.075 mg QD, duloxetine 60 mg BID, dicyclomine 20 mg QD, olmesartan 40 mg/25 mg QD, and carisoprodol 350 mg Q 6 h. The initial serum LTM level was >4 mEq/L. LTM was discontinued on admission. On the second hospital day, LTM levels trended down and were <1 mEq/L. The patient was extubated on hospital day 6 but remained noncommunicative and somnolent. On hospital day 10, the patient complained of headache and was then witnessed to have three separate tonic-clonic seizures with loss of bladder/bowel continence                                                                                                                                                                                                                   | She exhibited tremulousness on movement, myoclonic jerks, and 4+ reflexes with clonus | EEG showed moderate generalized slowing and epileptiform sharp waves reversing at the P3 derivation. A cranial CT scan showed new, symmetric areas of hypoattenuation involving subcortical white matter of the parieto-occipital regions suggestive of PRES. Subsequent brain MRI on 14 admission's day confirmed findings of PRES as manifested by symmetric parietal and posterior frontal subcortical FLAIR hyperintensities without corresponding reduced diffusivity. EEG showed bilateral anterior quadrant ictal discharges |

Contd...

## Supplemental Table 2: Contd...

| Main author | Comorbidities besides LTM indication                      | LTM dose (mg) | LTM levels | Time from LTM start to symptoms | Time from management to recovery                                                                  | Follow-up | Important CH and CM                                                                                                                                                                                                                                                                                                                                                                                                                                                                                                                                                                                                                                                                                                                                                                                                                                                                                                                                                                                                                                                                                                                                                            | Neurological symptoms and clinical examination                                        | Neuroimaging - CT scan, brain MRI, and EEG                                                                                                                                                                                                                                                                                                                                  |
|-------------|-----------------------------------------------------------|---------------|------------|---------------------------------|---------------------------------------------------------------------------------------------------|-----------|--------------------------------------------------------------------------------------------------------------------------------------------------------------------------------------------------------------------------------------------------------------------------------------------------------------------------------------------------------------------------------------------------------------------------------------------------------------------------------------------------------------------------------------------------------------------------------------------------------------------------------------------------------------------------------------------------------------------------------------------------------------------------------------------------------------------------------------------------------------------------------------------------------------------------------------------------------------------------------------------------------------------------------------------------------------------------------------------------------------------------------------------------------------------------------|---------------------------------------------------------------------------------------|-----------------------------------------------------------------------------------------------------------------------------------------------------------------------------------------------------------------------------------------------------------------------------------------------------------------------------------------------------------------------------|
|             | Diabetes mellitus, hypertension                           | ...           | 1.7 mEq/L  | ...                             | Throughout the remainder of the admission, the patient's mental status never returned to baseline | ...       | Home medications included amitriptyline, sertraline, levothyroxine, and LTM (doses unknown). LTM was discontinued on admission. On the 12 <sup>th</sup> hospital day, the patient aspirated and developed acute respiratory failure with rapid clinical decline requiring intubation                                                                                                                                                                                                                                                                                                                                                                                                                                                                                                                                                                                                                                                                                                                                                                                                                                                                                           | Complaints of weakness and syncope accompanied by "jerk" movements of his extremities | An initial cranial CT scan was normal and initial EEG revealed background slowing. A brain MRI showed symmetric subcortical parieto-occipital and temporal lobe vasogenic edema characteristic of PRES and without evidence of hemorrhage. EEG after intubation (day 13) revealed worsening, severe diffuse disturbance of the cortical activity without epileptic activity |
| Loens S     | Hypertension, hypothyroidism, diabetes mellitus, and COPD | ...           | 1.7 mmol/L | ...                             | 25 days                                                                                           | ...       | Her medication consisted of hydrochlorothiazide, valsartan, L-thyroxine, glimepiride, quetiapine, piiperperone, chlorprothixene, and LTM. 4 days before admittance, she had been discharged from another hospital to her regular nursing home after being treated for LTM intoxication. On admission, the serum LTM was 1.7 mmol/L (0.6-0.8 mmol/L). The patient was admitted to the ICU. LTM therapy was stopped. Hydrochlorothiazide and valsartan were withdrawn as well, considering their potential to increase LTM levels, as were quetiapine, piiperperone and chlorprothixene. Despite nearly normalized laboratory parameters, including LTM levels, after 3 days of treatment, the patient still did hardly respond to pain. The antihypertensive therapy was intensified, and MAP held in a range of 70-105 mmHg. Nevertheless, the patient remained unconscious for 10 days. When her vigilance improved, antipsychotic medication with quetiapine was reinstalled since the patient showed severe disorientation, restlessness, agitation and rapid mood swings. Furthermore, cortical blindness was evident. Finally, after 25 days, the patient fully recovered | Somnolence, disorientation, dysarthria, and generalized MCL                           | Second cranial CT scan showed bilateral posterior hypointensities suggestive of PRES. The diagnosis was confirmed by brain MRI                                                                                                                                                                                                                                              |

Contd...

**Supplemental Table 2: Contd...**

| Main author  | Comorbidities besides LTM indication | LTM dose (mg) | LTM levels  | Time from LTM start to symptoms                                                                                                                                                                                                 | Time from management to recovery | Follow-up                                                                                                | Important CH and CM                                                                                           | Neurological symptoms and clinical examination                                                                                                                                                                                                                                                                                                           | Neuroimaging – CT scan, brain MRI, and EEG |
|--------------|--------------------------------------|---------------|-------------|---------------------------------------------------------------------------------------------------------------------------------------------------------------------------------------------------------------------------------|----------------------------------|----------------------------------------------------------------------------------------------------------|---------------------------------------------------------------------------------------------------------------|----------------------------------------------------------------------------------------------------------------------------------------------------------------------------------------------------------------------------------------------------------------------------------------------------------------------------------------------------------|--------------------------------------------|
| Vandewalle W | ...                                  | ...           | ...         | ...                                                                                                                                                                                                                             | ...                              | ...                                                                                                      | Study that assessed the MDs caused by different antidepressants. MCL was associated with LTM in 2 individuals | ...                                                                                                                                                                                                                                                                                                                                                      | ...                                        |
| Hayashi Y    | Hypertension                         | 600 mg daily  | 3.28 mEq/L  | Her symptoms started after 3 weeks of azilsartan administration. She was diagnosed to have LTM intoxication based on an elevated serum LTM concentration of 3.28 mEq/L. Took LTM for the last 10 years                          | ...                              | ...                                                                                                      | ...                                                                                                           | Action tremor and showed a gradual deterioration of her physical state. Mild consciousness disturbances, MCL, truncal ATX, and appetite loss                                                                                                                                                                                                             | ...                                        |
| Hellmann MJ  | COPD                                 | ...           | 5.17 mmol/L | 1 month prior, he was hospitalized for a COPD exacerbation and started on lisinopril for hypertension. Days after discharge, his family noticed progressive confusion, ATX, and dysarthria; he became incontinent and lethargic | ...                              | At 1 year follow-up, the patient had residual memory impairment and required walking aids for ambulation | 1 month prior, he was hospitalized for a COPD exacerbation and started on lisinopril for hypertension         | Days after discharge, his family noticed progressive confusion, ATX, and dysarthria. He became incontinent and lethargic and was brought to an outside facility for evaluation. On arrival, he was agitated, withdrawing to painful stimulation and moaning incoherently. He exhibited coarse tremors, hyperreflexia, fasciculation, and myoclonic jerks | ...                                        |

Contd...

## Supplemental Table 2: Contd...

| Main author | Comorbidities besides LTM indication                       | LTM dose (mg)      | LTM levels | Time from LTM start to symptoms                                                                               | Time from management to recovery                                                                                                                                                                                                            | Follow-up | Important CH and CM                                                                                                                                                                                                                                                                                                                                                                                                                                                                                                                                                                                                                                                                                                                                                     | Neurological symptoms and clinical examination                                                                                                                                                                                                                                                                                                                                                                                                                                                                                            | Neuroimaging - CT scan, brain MRI, and EEG                                                                                                                                                                                                                                                                                                                                                                                                                                                                                                                                                                                                                                                                                          |
|-------------|------------------------------------------------------------|--------------------|------------|---------------------------------------------------------------------------------------------------------------|---------------------------------------------------------------------------------------------------------------------------------------------------------------------------------------------------------------------------------------------|-----------|-------------------------------------------------------------------------------------------------------------------------------------------------------------------------------------------------------------------------------------------------------------------------------------------------------------------------------------------------------------------------------------------------------------------------------------------------------------------------------------------------------------------------------------------------------------------------------------------------------------------------------------------------------------------------------------------------------------------------------------------------------------------------|-------------------------------------------------------------------------------------------------------------------------------------------------------------------------------------------------------------------------------------------------------------------------------------------------------------------------------------------------------------------------------------------------------------------------------------------------------------------------------------------------------------------------------------------|-------------------------------------------------------------------------------------------------------------------------------------------------------------------------------------------------------------------------------------------------------------------------------------------------------------------------------------------------------------------------------------------------------------------------------------------------------------------------------------------------------------------------------------------------------------------------------------------------------------------------------------------------------------------------------------------------------------------------------------|
| Kayjpmaz S  | Bronchiolitis                                              | 300 mg twice a day | 1.7 mEq/L  | Her symptoms began the day after she started using moxifloxacin 400 mg/day for the treatment of bronchiolitis | After removal of the LTM and moxifloxacin, the tremors and myoclonic jerks were diminished. On the 2 <sup>nd</sup> day, drowsiness and disorientation were still evident, but these remaining neurological signs were resolved 1 week later | ...       | 5-year history of BD. She started on LTM carbonate 600 mg/day, haloperidol 10 mg/day, and risperidone 2 mg/day at her first manic episode in 2010. After she had a depressive episode in 2011, sertraline 25 mg/day added to treatment, and from then until January 2016, her serum LTM concentration ranged from 0.60 to 0.80 mmol/L. She had been maintained on LTM carbonate 300 mg twice a day. Her symptoms began the day after she started using moxifloxacin 400 mg/day for the treatment of bronchiolitis                                                                                                                                                                                                                                                       | Severe tremor in both hands, myoclonic jerks of the upper extremities, exhaustion, and slurred speech. On her mental state examination, she was slightly drowsy and disoriented. Her speech was slurred                                                                                                                                                                                                                                                                                                                                   | Brain MRI and EEG were normal                                                                                                                                                                                                                                                                                                                                                                                                                                                                                                                                                                                                                                                                                                       |
| Stekarova I | Hypertension, rheumatoid arthritis, autoimmune thyroiditis | 900 mg daily       | 2.7 mmol/L | 10 years after starting LTM (not clear)                                                                       | 3 months after the intoxication, she was able to walk 40-50 m alone with a cane. Her condition significantly improved                                                                                                                       | ...       | The patient had a history of surgery for uterine adenocarcinoma 1 year ago. She was treated for hypertension (beta-blockers: Bisoprolol 5 mg daily, ACE inhibitors: Perindopril 4 mg daily). She was further treated with quetiapine (400 mg daily) due to psychiatric indications. She has been followed up for rheumatoid arthritis and previously treated with biological treatment, and autoimmune thyroiditis, atypical form of lymphocytic thyroiditis. The patient was asked about gastrointestinal difficulties before the current disease. She mentioned diarrhea and abdominal pain 2 months before the hospitalization. During the hospitalization, the patient developed bulbar symptoms with dysarthria and dysphagia and worsening of cerebellar symptoms | Admitted to the neurological department for gait impairment lasting for 2 days with muscle weakness, MCL, impaired speech, and in particular short-term memory disorders. Neurological examination revealed remarkable generalized MCL in the upper and lower extremities and mild memory impairment. Severe tremor was present in the upper extremities with mild ATX; tendon reflexes were symmetrical and normally elicitable, spastic pyramidal signs were negative with generalized muscle weakness. Bulbar symptoms with dysarthria | EEG revealed abnormal pattern with diffusely irregular delta frequency of 3-4 Hz, presence of occasional sharp waves and theta triphasic isolated complexes. CT scan of the chest and abdomen revealed a focal lesion in the right mediastinum, suspected tumor, or enlarged lymph nodes. Brain MRI revealed no clear pathology, only findings of minor diffuse atrophy, and a few nonspecific lesions in both hemispheres. EMG examination showed low amplitude of motor responses (CMAP) in the lower and upper extremities; the histogram provided a higher percentage of myogenic units in the right tibialis anterior muscle. No myoclonic jerks were found in the vastus lateralis muscle, MUPs were normal in size and shape |

Contd...



## Supplemental Table 2: Contd...

| Main author     | Comorbidities besides LTM indication | LTM dose (mg) | LTM levels     | Time from LTM start to symptoms | Time from management to recovery                                                                                                                                              | Follow-up                                         | Important CH and CM                                                                  | Neurological symptoms and clinical examination                                                                                                                | Neuroimaging - CT scan, brain MRI, and EEG                                                                                                                                        |
|-----------------|--------------------------------------|---------------|----------------|---------------------------------|-------------------------------------------------------------------------------------------------------------------------------------------------------------------------------|---------------------------------------------------|--------------------------------------------------------------------------------------|---------------------------------------------------------------------------------------------------------------------------------------------------------------|-----------------------------------------------------------------------------------------------------------------------------------------------------------------------------------|
| Jacobson JC     | Delayed subcortical dementia         | ...           | 2.2 mmol/L     | ...                             | After 2 years of poisoning by LTM, she still shows signs of profound cognitive decline, including inattention, marked apathy, and decline in group and independent activities | Follow-up brain MRI investigation was unrevealing | In its history, there an event of acute LTM poisoning                                | Myoclonic jerks, tremors, and expressive aphasia                                                                                                              | Brain MRI was normal                                                                                                                                                              |
| Orleans RA      | ...                                  | ...           | ...            | ...                             | ...                                                                                                                                                                           | ...                                               | A case of dose-dependent LTM effects of stroke-related and chronic cerebellar tremor | ...                                                                                                                                                           | ...                                                                                                                                                                               |
| Sarrigiannis PG | ...                                  | 400 mg daily  | 0.4-1.0 mmol/L | 40 years on LTM (uncertain)     | ...                                                                                                                                                                           | ...                                               | ...                                                                                  | ATX on finger-nose and heel to sheen examination, evidence of gait ATX, and an irregular upper limb postural and action tremor that tended to persist at rest | Cerebellar MRI spectroscopy: Reduced NAA/Cr vermis 0.91 hemispheres 0.78. EEG showed background rhythms lying within normal limits with no clear focal or epileptiform discharges |
| ...             | ...                                  | 400 mg daily  | 0.4-1.0 mmol/L | 10 years on LTM (uncertain)     | ...                                                                                                                                                                           | ...                                               | History of excessive alcohol intake                                                  | ATX on finger-nose and heel to sheen examination, evidence of gait ATX, and an irregular upper limb postural and action tremor that tended to persist at rest | Cerebellar MRI spectroscopy: Reduced NAA/Cr vermis 0.87 hemispheres 1.04; EEG showed background rhythms lying within normal limits with no clear focal or epileptiform discharges |
| ...             | ...                                  | 400 mg daily  | 0.4-1.0 mmol/L | 7 years on LTM (uncertain)      | ...                                                                                                                                                                           | ...                                               | History of excessive alcohol intake                                                  | ATX on finger-nose and heel to sheen examination, evidence of gait ATX, and an irregular upper limb postural and action tremor that tended to persist at rest | Cerebellar MRI spectroscopy: Reduced NAA/Cr vermis 0.79 hemispheres 1.04; EEG showed background rhythms lying within normal limits with no clear focal or epileptiform discharges |

Contd...

**Supplemental Table 2: Contd...**

| Main author | Comorbidities besides LTM indication                                                 | LTM dose (mg) | LTM levels     | Time from LTM start to symptoms                                                                                    | Time from management to recovery                                                                                                                                                                                                                                             | Follow-up | Important CH and CM                                                                                                                                                                                                                       | Neurological symptoms and clinical examination                                                                                                                | Neuroimaging - CT scan, brain MRI, and EEG                                                                                                                                        |
|-------------|--------------------------------------------------------------------------------------|---------------|----------------|--------------------------------------------------------------------------------------------------------------------|------------------------------------------------------------------------------------------------------------------------------------------------------------------------------------------------------------------------------------------------------------------------------|-----------|-------------------------------------------------------------------------------------------------------------------------------------------------------------------------------------------------------------------------------------------|---------------------------------------------------------------------------------------------------------------------------------------------------------------|-----------------------------------------------------------------------------------------------------------------------------------------------------------------------------------|
| ...         | ...                                                                                  | 800 mg daily  | 0.4-1.0 mmol/L | 10 years on LTM (uncertain)                                                                                        | ...                                                                                                                                                                                                                                                                          | ...       | ...                                                                                                                                                                                                                                       | Jerky upper limb tremor, gaze evoked nystagmus, brisk reflexes, and gait ATX                                                                                  | Cerebellar MRI spectroscopy: Reduced NAA/Cr vermis 0.75 hemispheres 0.8; EEG showed background rhythms lying within normal limits with no clear focal or epileptiform discharges  |
| ...         | History of thyrotoxicosis treated with carbimazole but was euthyroid at presentation | 675 mg daily  | 0.4-1.0 mmol/L | 30 years on LTM (uncertain)                                                                                        | ...                                                                                                                                                                                                                                                                          | ...       | ...                                                                                                                                                                                                                                       | ATX on finger-nose and heel to shoen examination, evidence of gait ATX, and an irregular upper limb postural and action tremor that tended to persist at rest | Cerebellar MRI spectroscopy: Reduced NAA/Cr vermis 0.89 hemispheres 0.85; EEG showed background rhythms lying within normal limits with no clear focal or epileptiform discharges |
| ...         | ...                                                                                  | 400 mg daily  | 0.4-1.0 mmol/L | 20 years on LTM (uncertain)                                                                                        | ...                                                                                                                                                                                                                                                                          | ...       | ...                                                                                                                                                                                                                                       | Upper limb jerky postural/action tremor                                                                                                                       | EEG showed occasional sharp/spike and slow-wave discharges with a right frontotemporal and parietal emphasis                                                                      |
| ...         | Previous gastric bypass surgery, hypothyroidism                                      | 1000 mg daily | 0.4-1.0 mmol/L | 10 years on LTM (uncertain)                                                                                        | ...                                                                                                                                                                                                                                                                          | ...       | ...                                                                                                                                                                                                                                       | Upper limb jerky postural/action tremor; gait ATX, occasional jerks of the right leg                                                                          | EEG showed a single spike/slow-wave discharge occurred in the left frontotemporal region                                                                                          |
| ...         | ...                                                                                  | 800 mg daily  | 0.4-1.0 mmol/L | 29 years on LTM (uncertain)                                                                                        | ...                                                                                                                                                                                                                                                                          | ...       | ...                                                                                                                                                                                                                                       | Upper limb jerky postural/action tremor                                                                                                                       | EEG showed some nonspecific bursts of slow-wave activity, mainly theta                                                                                                            |
| Vallianou N | Ischemic heart disease and hypothyroidism                                            | 900 mg daily  | 2.03 mEq/L     | The patient has been using LTM for 37 years, and the current symptoms started 5 days before he sought medical help | LTM was immediately discontinued and vigorous hydration introduced, which resulted in subsequent normalization of serum LTM levels 2 days later. However, the patient still had ATX and memory deficits, and nystagmus was still present, together with extrapyramidal signs | ...       | The patient uses others medications (irbesartan/hydrochlorothiazide 300/12 mg, betaxolol 10 mg, triflusal 600 mg, ezetimibe/simvastatin 10/40 mg, thyroxin 50 µg); and there also records that the patient had LTM poisoning 11 years ago | Admitted for dysarthria, agitation, and confusion. On clinical examination, the patient was agitated with sluggishness, coarse tremors, and MCL               | Two cranial CT scans were negative for stroke                                                                                                                                     |

Contd...

**Supplemental Table 2: Contd...**

| Main author | Comorbidities besides LTM indication | LTM dose (mg) | LTM levels      | Time from LTM start to symptoms | Time from management to recovery                                | Follow-up                                                                                                                                                                                                       | Important CH and CM                                                                                                                                                                                                                                                                                                                                                                                                                                                                                                                  | Neurological symptoms and clinical examination                                                                                                                                                                                                      | Neuroimaging - CT scan, brain MRI, and EEG                                                                                                                                                                                |
|-------------|--------------------------------------|---------------|-----------------|---------------------------------|-----------------------------------------------------------------|-----------------------------------------------------------------------------------------------------------------------------------------------------------------------------------------------------------------|--------------------------------------------------------------------------------------------------------------------------------------------------------------------------------------------------------------------------------------------------------------------------------------------------------------------------------------------------------------------------------------------------------------------------------------------------------------------------------------------------------------------------------------|-----------------------------------------------------------------------------------------------------------------------------------------------------------------------------------------------------------------------------------------------------|---------------------------------------------------------------------------------------------------------------------------------------------------------------------------------------------------------------------------|
| Kizitan ME  | ...                                  | ...           | ...             | ...                             | ...                                                             | ...                                                                                                                                                                                                             | The manuscript does not clearly define the number of patients in use of LTM. However, they report that all patients with VPA or LTM-related MCL had subcortical subtype                                                                                                                                                                                                                                                                                                                                                              | ...                                                                                                                                                                                                                                                 | ...                                                                                                                                                                                                                       |
| Nagamine T  | Hypertension                         | 600 mg        | 3.2 mEq/L       | ...                             | 2 weeks                                                         | Complete recovery                                                                                                                                                                                               | Possible interaction among fluvoxamine, azilsartan, and LTM. CM: All prescribed drugs were discontinued. Fluid resuscitation with 0.9% saline solution was started                                                                                                                                                                                                                                                                                                                                                                   | Severe tremor in both hands and myoclonic jerks of the upper extremities                                                                                                                                                                            | Brain MRI was normal                                                                                                                                                                                                      |
| Burton C    | ...                                  | ...           | ...             | ...                             | ...                                                             | ...                                                                                                                                                                                                             | ...                                                                                                                                                                                                                                                                                                                                                                                                                                                                                                                                  | MCL, ataxia, and hyperreflexia                                                                                                                                                                                                                      |                                                                                                                                                                                                                           |
| Hyder S     | ...                                  | ...           | 3.0 mEq/L       | ...                             | ...                                                             | Complete recovery                                                                                                                                                                                               | LTM discontinued. Persistent reversible encephalopathy syndrome versus syndrome of irreversible LTM-effected neurotoxicity                                                                                                                                                                                                                                                                                                                                                                                                           | Tremors, MCL and hyperreflexia                                                                                                                                                                                                                      | Cranial CT scan was normal. Brain MRI showed subcortical hyperintensities symmetrically distributed in the parietal and parieto-occipital region                                                                          |
| <b>PKN</b>  |                                      |               |                 |                                 |                                                                 |                                                                                                                                                                                                                 |                                                                                                                                                                                                                                                                                                                                                                                                                                                                                                                                      |                                                                                                                                                                                                                                                     |                                                                                                                                                                                                                           |
| Dalén P     | Parkinson's disease                  | 2 mEq/day     | 0.2 mEq/L       | ...                             | ...                                                             | Hyperkinetic movements were significantly reduced                                                                                                                                                               | ...                                                                                                                                                                                                                                                                                                                                                                                                                                                                                                                                  | Increased PKN symptoms, and hyperkinetic movements were significantly reduced                                                                                                                                                                       | ...                                                                                                                                                                                                                       |
|             | Parkinson's disease                  | 12-16 mEq/day | 0.6 mEq/L       | ...                             | ...                                                             | During this treatment, her involuntary movements have completely disappeared                                                                                                                                    | ...                                                                                                                                                                                                                                                                                                                                                                                                                                                                                                                                  | Cogwheel rigidity. Hyperkinetic involuntary movements have completely disappeared                                                                                                                                                                   | ...                                                                                                                                                                                                                       |
| Cohen WJ    | ...                                  | 1800 mg/day   | 1.63-1.81 mEq/L | 5 days after LTM introduction   | 18 days after LTM discontinuation (28 days total hospital stay) | After 10 months, she continued with mask-like facies, totally demented, and incontinent and did not respond to any commands or speak. She became confused, tremulous, and bilateral grasp reflexes were present | Admission: She was euphoric, agitated and hyperactive, talking to God, and had pressured speech and flight of ideas. First 2 days: She was uncooperative, with inappropriate behavior, delusions, and hallucinations. In the next 2 days, the condition improved. In the 5 <sup>th</sup> day: She became confused, tremulous, weak, and lethargic, with an immobile facies, cogwheel rigidity, and sialorrhea. Haloperidol dosage was decreased to 20 mg/day, benzotriazine mesylate 2 mg/day was given. At the 8 <sup>th</sup> day: | Confusion, tremor, dysmetric ATX of the globes, vertical nystagmus, and urinary and fecal incontinence were observed. Involuntary, purposeless movements of all limbs and trunk, oculogyric crisis, and lead-pipe and cogwheel rigidity were noted. | Serial EEGs showed generalized slowing (without focal or epileptogenic abnormalities), A pneumoencephalogram showed a large cisterna magna, prominent spaces in the superior cerebellar region and widened cortical sulci |

Contd...

**Supplemental Table 2: Contd...**

| Main author | Comorbidities besides LTM indication | LTM dose (mg) | LTM levels | Time from LTM start to symptoms        | Time from management to recovery | Follow-up | Important CH and CM                                                                                                                                                                                                                                                                                                                                                                                                                                                                                                                                                                                              | Neurological symptoms and clinical examination                                                                                                                                      | Neuroimaging - CT scan, brain MRI, and EEG |
|-------------|--------------------------------------|---------------|------------|----------------------------------------|----------------------------------|-----------|------------------------------------------------------------------------------------------------------------------------------------------------------------------------------------------------------------------------------------------------------------------------------------------------------------------------------------------------------------------------------------------------------------------------------------------------------------------------------------------------------------------------------------------------------------------------------------------------------------------|-------------------------------------------------------------------------------------------------------------------------------------------------------------------------------------|--------------------------------------------|
| Shopsin B   | ...                                  | ...           | ...        | Evaluated after 11 months of treatment | ...                              | ...       | Her temperature was 39.3°C. Haloperidol and benzotropine mesylate treatment were discontinued; she was prostrate, stuporous, and restless, with involuntary, purposeless movements of all limbs and trunk, oculogyric crisis, and lead-pipe and cogwheel rigidity; she was extremely confused and disoriented, with unintelligible, dysarthric speech. Dysmetric ataxia of the globes, vertical nystagmus, and urinary and fecal incontinence were observed. 8 <sup>th</sup> day: Haloperidol and benzotropine mesylate treatment was discontinued. 10 <sup>th</sup> day: LTM carbonate therapy was discontinued | Opsoclonus, cogwheel and lead-pipe rigidity, wildly uncoordinated movements of all extremities, rolling movements of the head and trunk, hypotonic muscles and joints were observed | ...                                        |
|             | ...                                  | ...           | ...        | Evaluated after 18 months of treatment | ...                              | ...       | This symptom does not subside with the use of intravenously administered antiparkinsonian drugs. Used benzotropine                                                                                                                                                                                                                                                                                                                                                                                                                                                                                               | Severity of cogwheel rigidity: 1-2                                                                                                                                                  | ...                                        |
|             | ...                                  | ...           | ...        | Evaluated after 60 months of treatment | ...                              | ...       | This symptom improve with intravenously administered benzotropine                                                                                                                                                                                                                                                                                                                                                                                                                                                                                                                                                | Severity of cogwheel rigidity: 4                                                                                                                                                    | ...                                        |
|             | ...                                  | ...           | ...        | Evaluated after 60 months of treatment | ...                              | ...       | ...                                                                                                                                                                                                                                                                                                                                                                                                                                                                                                                                                                                                              | Severity of cogwheel rigidity: 1-2                                                                                                                                                  | ...                                        |
|             | ...                                  | ...           | ...        | Evaluated after 48 months of treatment | ...                              | ...       | This symptom does not subside with the use of intravenously administered antiparkinsonian drugs. Other medication: Benzotropine                                                                                                                                                                                                                                                                                                                                                                                                                                                                                  | Severity of cogwheel rigidity: 4                                                                                                                                                    | ...                                        |
|             | ...                                  | ...           | ...        | Evaluated after 14 months of treatment | ...                              | ...       | ...                                                                                                                                                                                                                                                                                                                                                                                                                                                                                                                                                                                                              | Severity of cogwheel rigidity: 1-2                                                                                                                                                  | ...                                        |
|             | ...                                  | ...           | ...        | Evaluated after 36 months of treatment | ...                              | ...       | ...                                                                                                                                                                                                                                                                                                                                                                                                                                                                                                                                                                                                              | Severity of cogwheel rigidity: 2                                                                                                                                                    | ...                                        |
|             | ...                                  | ...           | ...        | Evaluated after 60 months of treatment | ...                              | ...       | ...                                                                                                                                                                                                                                                                                                                                                                                                                                                                                                                                                                                                              | Severity of cogwheel rigidity: 4                                                                                                                                                    | ...                                        |
|             | ...                                  | ...           | ...        | Evaluated after 16 months of treatment | ...                              | ...       | This symptom does not subside with the use of intravenously administered antiparkinsonian drugs                                                                                                                                                                                                                                                                                                                                                                                                                                                                                                                  | Severity of cogwheel rigidity: 1-2                                                                                                                                                  | ...                                        |

Contd...

**Supplemental Table 2: Contd...**

| Main author | Comorbidities besides LTM indication | LTM dose (mg) | LTM levels    | Time from LTM start to symptoms                                              | Time from management to recovery | Follow-up | Important CH and CM                                                                             | Neurological symptoms and clinical examination                                                                                                                                                                                                                                                                                                                                                                                                  | Neuroimaging - CT scan, brain MRI, and EEG |
|-------------|--------------------------------------|---------------|---------------|------------------------------------------------------------------------------|----------------------------------|-----------|-------------------------------------------------------------------------------------------------|-------------------------------------------------------------------------------------------------------------------------------------------------------------------------------------------------------------------------------------------------------------------------------------------------------------------------------------------------------------------------------------------------------------------------------------------------|--------------------------------------------|
|             | ...                                  | ...           | ...           | Evaluated after 36 months of treatment                                       | ...                              | ...       | This symptom does not subside with the use of intravenously administered antiparkinsonian drugs | Severity of cogwheel rigidity: 3                                                                                                                                                                                                                                                                                                                                                                                                                | ...                                        |
|             | ...                                  | ...           | ...           | Evaluated after 24 months of treatment                                       | ...                              | ...       | ...                                                                                             | Severity of cogwheel rigidity: 1-2                                                                                                                                                                                                                                                                                                                                                                                                              | ...                                        |
|             | ...                                  | ...           | ...           | Evaluated after 36 months of treatment                                       | ...                              | ...       | This symptom does not subside with the use of intravenously administered antiparkinsonian drugs | Severity of cogwheel rigidity: 2-3                                                                                                                                                                                                                                                                                                                                                                                                              | ...                                        |
|             | ...                                  | ...           | ...           | Evaluated after 48 months of treatment                                       | ...                              | ...       | This symptom improved with the use of intravenously administered benzotropine                   | Severity of cogwheel rigidity: 2-3                                                                                                                                                                                                                                                                                                                                                                                                              | ...                                        |
|             | ...                                  | ...           | ...           | Evaluated after 48 months of treatment                                       | ...                              | ...       | This symptom does not subside with the use of intravenously administered antiparkinsonian drugs | Severity of cogwheel rigidity: 2                                                                                                                                                                                                                                                                                                                                                                                                                | ...                                        |
|             | ...                                  | ...           | ...           | Evaluated after 36 months of treatment                                       | ...                              | ...       | This symptom does not subside with the use of intravenously administered antiparkinsonian drugs | Severity of cogwheel rigidity: 3                                                                                                                                                                                                                                                                                                                                                                                                                | ...                                        |
|             | ...                                  | ...           | ...           | Evaluated after 16 months of treatment                                       | ...                              | ...       | ...                                                                                             | Severity of cogwheel rigidity: 1                                                                                                                                                                                                                                                                                                                                                                                                                | ...                                        |
| Branchey MH | ...                                  | ...           | 0.6-1.2 mEq/L | About 2 years (patients used LTM from 6 months to 7 years before evaluation) | ...                              | ...       | ...                                                                                             | A total of 36 individuals were studied, 3 developed some degree of cogwheel rigidity, with limb rigidity and tremor of extremities. These 3 have been taking LTM for 2 years or more. 6 other patients had rigidity and tremor, 15 had only tremor, and 2 had only rigidity. 4 patients responsive to the glabella tap (positive) where between the group with evidence of tremor. The degree of rigidity shown in the 11 patients was very low | ...                                        |

Contd...

**Supplemental Table 2: Contd...**

| Main author | Comorbidities besides LTM indication             | LTM dose (mg)                        | LTM levels     | Time from LTM start to symptoms                                      | Time from management to recovery | Follow-up                                                                                                           | Important CH and CM                                                                                                                                                                                                                                                                                                                                                                            | Neurological symptoms and clinical examination                                                                                                                                                                                                                                                                                                                                                                                                                 | Neuroimaging - CT scan, brain MRI, and EEG |
|-------------|--------------------------------------------------|--------------------------------------|----------------|----------------------------------------------------------------------|----------------------------------|---------------------------------------------------------------------------------------------------------------------|------------------------------------------------------------------------------------------------------------------------------------------------------------------------------------------------------------------------------------------------------------------------------------------------------------------------------------------------------------------------------------------------|----------------------------------------------------------------------------------------------------------------------------------------------------------------------------------------------------------------------------------------------------------------------------------------------------------------------------------------------------------------------------------------------------------------------------------------------------------------|--------------------------------------------|
| Loudon JB   | ...                                              | ...                                  | 0.6-1.5 mEq/L  | ...                                                                  | ...                              | ...                                                                                                                 | ...                                                                                                                                                                                                                                                                                                                                                                                            | Rigidity, tremor, DTN, ...<br>TD, restless legs, bruxism. Possible interaction with haloperidol. The PKN symptoms only alleviate after LTM withdrawal                                                                                                                                                                                                                                                                                                          | ...                                        |
| Lutz EG     | ...                                              | ...                                  | ...            | ...                                                                  | ...                              | ...                                                                                                                 | Acute LTM-induced PKN precipitated by liquid protein diet                                                                                                                                                                                                                                                                                                                                      | ...                                                                                                                                                                                                                                                                                                                                                                                                                                                            | ...                                        |
| Asnis GM    | ...                                              | ...                                  | 0.81-1.0 mEq/L | Different groups used LTM for about 44-73.5 months before evaluation | ...                              | ...                                                                                                                 | Of the 97 patients, 79 were receiving LTM without concomitant antipsychotic or dopamine-depleting agents, although 19 of these 79 patients had concomitant use of tricyclic antidepressants. There were no significant differences between the group with slight cogwheel rigidity and the group with no cogwheel rigidity in regard to age, duration of lithium treatment, or serum LTM level | Of the total of 22 patients with bilateral cogwheel rigidity, severity was rated as slight in 10 cases and moderate in 12, whereas all 16 patients with unilateral cogwheel rigidity were given slight severity ratings. Patients treated with LTM alone - slight (n=22) and moderate (n=6) cogwheel rigidity. Patients treated with lithium + dopamine blocker/depletter - slight (n=4) and moderate (n=6) cogwheel rigidity. 34 individuals presented tremor | ...                                        |
| Tyrer P     | Episodic affective and schizophreniform symptoms | 400-800 mg daily (sustained release) | 0.6-1.5 mmol/L | 2 weeks                                                              | 2 months                         | Her symptoms persisted after discharge from hospital and only improved when orphenadrine was stopped 2 months later | She was prescribed the antiparkinsonian drug (orphenadrine) to facilitate improvement                                                                                                                                                                                                                                                                                                          | Mask-like facies with no spontaneous movement of face or limbs, tremor of arms and legs, marked salivation with dribbling, and severe cogwheel rigidity                                                                                                                                                                                                                                                                                                        | ...                                        |

Contd...

## Supplemental Table 2: Contd...

| Main author | Comorbidities besides LTM indication | LTM dose (mg) | LTM levels                  | Time from LTM start to symptoms                                                                                                                                                                                                                                                                                                  | Time from management to recovery                                                                  | Follow-up                                                                                                                                                                                                                                                                                                                      | Important CH and CM                                                                                           | Neurological symptoms and clinical examination                                                                                                                                                                                                                                                                                                                                                                                                                                                                                                                                                                 | Neuroimaging - CT scan, brain MRI, and EEG |
|-------------|--------------------------------------|---------------|-----------------------------|----------------------------------------------------------------------------------------------------------------------------------------------------------------------------------------------------------------------------------------------------------------------------------------------------------------------------------|---------------------------------------------------------------------------------------------------|--------------------------------------------------------------------------------------------------------------------------------------------------------------------------------------------------------------------------------------------------------------------------------------------------------------------------------|---------------------------------------------------------------------------------------------------------------|----------------------------------------------------------------------------------------------------------------------------------------------------------------------------------------------------------------------------------------------------------------------------------------------------------------------------------------------------------------------------------------------------------------------------------------------------------------------------------------------------------------------------------------------------------------------------------------------------------------|--------------------------------------------|
| Reches A    | ...                                  | 1200 mg/day   | 0.5-1.4 mMol/L<br>1.8 mEq/L | 8 years                                                                                                                                                                                                                                                                                                                          | ...                                                                                               | ...                                                                                                                                                                                                                                                                                                                            | During different acute episodes, she had been treated with ECT, amitrityline, haloperidol, and chlorpromazine | Positive glabellar tap ... and a coarse tremor of hands and feet. On the Simpson-Angus Rating Scale, her mean score was 1.4. Tremor, difficulty in walking, and cogwheel rigidity                                                                                                                                                                                                                                                                                                                                                                                                                              | ...                                        |
|             |                                      |               |                             | Approximately 1 year later, a diagnosis of Parkinson's disease was made because of progressive hypokinesia and increased muscular tone. Approximately 4 years after the beginning of his therapy with LTM carbonate, the patient was referred to our department with the diagnosis of atypical, unresponsive Parkinson's disease | Withdrawing the LTM carbonate resulted in dramatic improvement of his condition over several days | The patient became well oriented and the motor disturbances completely regressed; antiparkinsonian medications were no longer needed. The patient has been followed up for 1 year after his discharge. During this period, repeated neurological examinations gave normal results, with no signs of extrapyramidal dysfunction | Anticholinergic agents and a combination of levodopa + carbidopa, amantadine hydrochloride (300 mg/day)       | Disoriented and slightly dysarthric patient. Fine postural tremor of the hands and fine muscular twitches in most muscles were observed. Marked cogwheel rigidity was found in all four extremities, along with hyperactive muscle stretch reflexes. No pathological reflexes were elicited. Dystonic posturing of the toes and dyskinetic movements of the tongue, face, and both hands were frequently observed. The respirations were disturbed by irregular contractions of the diaphragm. He was very bradykinetic. His gait was slow, shuffling, unsteady, and unaccompanied by any associated movements |                                            |

Contd...

**Supplemental Table 2: Contd...**

| Main author | Comorbidities besides LTM indication | LTM dose (mg) | LTM levels                                                                                  | Time from LTM start to symptoms | Time from management to recovery | Follow-up                                                        | Important CH and CM                                                                                                                                                                                                                                                                                                   | Neurological symptoms and clinical examination                                                                                                                                                                                                                                                                                                                                                                                                                                          | Neuroimaging - CT scan, brain MRI, and EEG                                                                                                                                                                                                                                                                                                              |
|-------------|--------------------------------------|---------------|---------------------------------------------------------------------------------------------|---------------------------------|----------------------------------|------------------------------------------------------------------|-----------------------------------------------------------------------------------------------------------------------------------------------------------------------------------------------------------------------------------------------------------------------------------------------------------------------|-----------------------------------------------------------------------------------------------------------------------------------------------------------------------------------------------------------------------------------------------------------------------------------------------------------------------------------------------------------------------------------------------------------------------------------------------------------------------------------------|---------------------------------------------------------------------------------------------------------------------------------------------------------------------------------------------------------------------------------------------------------------------------------------------------------------------------------------------------------|
| Spring G    | ...                                  | 1500 mg/day   | 0.8 mEq/L (1 <sup>st</sup> hospitalization),<br>1.5 mEq/L (2 <sup>nd</sup> hospitalization) | ...                             | 1 month (unclear)                | Needed ICU care                                                  | Required physical restraint for 14 days. 1 <sup>st</sup> hospitalization: Chlorpromazine was discontinued and the EPSs completely cleared. 1.5 years after in the 2 <sup>nd</sup> hospitalization: LTM was discontinued. When EPSs appeared, chlorpromazine was immediately discontinued and the symptoms disappeared | Severe EPSs, especially marked rigidity. Difficulty initiating voluntary movements, swallowing, fever of 104°F. his speech was dysarthric and not intelligible, involuntary movements of the tongue and lips, DKN. Parkinsonian gait, cogwheeling, festinating gait                                                                                                                                                                                                                     | EEG was mildly abnormal, with diffuse, slight slowing 7-8 cycles/s. It was read as showing diffuse bilateral cerebral dysfunction of a nonspecific degree consistent with toxic or metabolic encephalopathy. Repeat EEGs showed an initial slight deterioration, then a gradual improvement and return to normal over a period of approximately 1 month |
| Apte SN     | ...                                  | 1200 mg/day   | 2.8 mEq/L                                                                                   | 3 weeks                         | ...                              | 4 years later, the patient was evaluated on neurobehavioral unit | The medication was discontinued, and she was treated with IV fluids. Other medication: Tetracycline                                                                                                                                                                                                                   | Bilateral gaze-dependent nystagmus, saccadic pursuit, scanning speech, and lead-pipe rigidity of all extremities were noted. Finger-to-nose and heel-to-shin tests revealed dysmetria; rapid alternating movements were poorly performed in all extremities, and she had a broad-based ataxic gait. Reflexes were brisk throughout except in the right arm, where she had findings consistent with a previously diagnosed radial nerve compression palsy. Plantar responses were flexor | ...                                                                                                                                                                                                                                                                                                                                                     |

Contd...



**Supplemental Table 2: Contd...**

| Main author  | Comorbidities besides LTM indication | LTM dose (mg)                         | LTM levels | Time from LTM start to symptoms | Time from management to recovery | Follow-up                                                                                                                                                                                                                                                                                                                                                                                                                                                                                                                                                                           | Important CH and CM                                                                                                                                                                                                                                                                                                                                                     | Neurological symptoms and clinical examination                                                                                                                                                                                                                                                           | Neuroimaging - CT scan, brain MRI, and EEG                                                                            |
|--------------|--------------------------------------|---------------------------------------|------------|---------------------------------|----------------------------------|-------------------------------------------------------------------------------------------------------------------------------------------------------------------------------------------------------------------------------------------------------------------------------------------------------------------------------------------------------------------------------------------------------------------------------------------------------------------------------------------------------------------------------------------------------------------------------------|-------------------------------------------------------------------------------------------------------------------------------------------------------------------------------------------------------------------------------------------------------------------------------------------------------------------------------------------------------------------------|----------------------------------------------------------------------------------------------------------------------------------------------------------------------------------------------------------------------------------------------------------------------------------------------------------|-----------------------------------------------------------------------------------------------------------------------|
| Donaldson IM | ...                                  | 1500 mg/day, 1000 mg/day 4 days later | 1.9 mEq/L  | 5 weeks                         | ...                              | When assessed at the neurology department of Christchurch (New Zealand) Hospital, 5 months later, she was markedly. She had mild anisocoria, lid retraction, lid lag, and severe dysarthria with slurred monosyllabic speech. There was resting tremor of the head and all limbs, of approximately 3 Hz. She had mild generalized hypertonía, hyperreflexia with flexor plantar responses, and gross incoordination in all limbs with intention tremor. She was unable to walk without the support of one person. Follow-up examination after 2 years showed no change in her signs | WBC count of 13,200/cumm with 74% neutrophils. LTM carbonate therapy was discontinued the day after admission, and benzotropine mesylate (2 mg twice daily) was given for 8 days. The patient also received IV ampicillin sodium (3200 mg/day). Other med: Haloperidol (30 mg/day) and procyclidine hydrochloride (10 mg/day), benzotropine mesylate (2 mg twice daily) | Kernig's sign was questionable positive, she was akinetic and mute and had generally increased tone, sialorrhea, and a positive response to glabellar tap, she was disoriented, dysarthric, and anisocoria; lid retraction, lid lag, and severe dysarthria with slurred monosyllabic speech, tremor, ATX | Pneumoencephalogram showed widening of the cerebellar sulci suggestive of cerebellar atrophy but was otherwise normal |
| ...          | ...                                  | 1000 mg/day                           | 3.9 mEq/L  | 2 years                         | ...                              | 1 year after, she had ocular dysmetria and markedly slurred, monosyllabic, scanning speech. She was generally hyperreflexic, with absent ankle jerks and flexor plantar responses, and had markedly incoordinated limbs and intention tremor. She was very ataxic and unable to walk unassisted                                                                                                                                                                                                                                                                                     | On admission, her temperature was 38.8°C. She had tachycardia of 100 beats/min, and her BP was 160/110 mmHg. She was given 2 mg of benzotropine mesylate, without improvement. Alkaline phosphatase level of 498 IU/L. Both drugs were discontinued. The patient was treated with IV fluids at a rate of 4 L/day. Other medication: Haloperidol (10-20 mg/day)          | Speech incomprehensible, motor perseveration, involuntary facial movements, tone generally increased, cogwheel rigidity, hyperreflexia present in the arms, oral DKN                                                                                                                                     | ...                                                                                                                   |

Contd...

**Supplemental Table 2: Contd...**

| Main author | Comorbidities besides LTM indication          | LTM dose (mg)                  | LTM levels      | Time from LTM start to symptoms | Time from management to recovery | Follow-up                                                                                      | Important CH and CM                                                                                                                                                                                                                                                                                                                                                                                 | Neurological symptoms and clinical examination                                                                                                                                                                                                                                                                    | Neuroimaging - CT scan, brain MRI, and EEG |
|-------------|-----------------------------------------------|--------------------------------|-----------------|---------------------------------|----------------------------------|------------------------------------------------------------------------------------------------|-----------------------------------------------------------------------------------------------------------------------------------------------------------------------------------------------------------------------------------------------------------------------------------------------------------------------------------------------------------------------------------------------------|-------------------------------------------------------------------------------------------------------------------------------------------------------------------------------------------------------------------------------------------------------------------------------------------------------------------|--------------------------------------------|
| Perényi A   | ...                                           | ...                            | 0.3-1.5 mMol/L  | 3-168 months (unclear)          | ...                              | ...                                                                                            | 24 patients were receiving treatment with LTM alone, 30 with LTM and 1 or more neuroleptics, and 27 with LTM and antidepressant                                                                                                                                                                                                                                                                     | Severe tremor, salivation, blepharospasm, cogwheel rigidity, AKT, and akinesia                                                                                                                                                                                                                                    | ...                                        |
| Lang AE     | ...                                           | 600 mg/day                     | 1.35 mmol/L     | Early in treatment to 10 years  | 5 weeks                          | ...                                                                                            | LTM was discontinued, and 5 weeks later, aside from a mild postural tremor and poor postural stability, all signs of PKN had resolved. Performance on timed maneuvers of finger and hand dexterity, foot tapping, and walking had improved markedly                                                                                                                                                 | Intermittent rest tremor in the right arm and a bilateral postural tremor in the outstretched arms. She had rigidity in all limbs and in her neck and trunk, and she demonstrated moderately severe bradykinesia of both hands and feet. Her posture was flexed, gait was slowed, and postural stability was poor | ...                                        |
| Addonizio G | ...                                           | 1200 mg/day divided in 4 doses | 0.46-1.15 mEq/L | 1 day                           | 8 weeks                          | Tremor and rigidity disappeared, and the patient continued to receive 10 mg of trifluoperazine | Haloperidol 10 mg/day in the admission. After 8 days, benzotropine was added 3 mg/day. Haloperidol was discontinued and trifluoperazine 20 mg/day was added. LTM was tapered and discontinued 15 days after initiation. History of occasional cocaine abuse                                                                                                                                         | Coarse parkinsonian tremor in both arms, head tremor, sialorrhea, marked rigidity, confusion                                                                                                                                                                                                                      | Sleep EEG was normal                       |
|             | 5-year history of paranoid psychotic episodes | 900-1800 mg/day                | 0.5-1.17 mEq/L  | 1 day                           | ...                              | He still complained of stiffness and had a persistent hand tremor upon discharge               | LTM was increased to 1800 mg/day during 4 weeks, chlorpromazine was tapered to 200 mg/day, benzotropine was maintained at 2 mg/day. Under this regimen, tremor and rigidity improved, but stiffness and hand tremor persisted. 200-600 mg daily of chlorpromazine for 5 years                                                                                                                       | Stiffness in his face, arms and legs. Mild rigidity in his arms and coarse parkinsonian tremor in both hands                                                                                                                                                                                                      | ...                                        |
| Dyson EH    | ....                                          | ...                            | ...             | 6 days-5 years                  | ...                              | ...                                                                                            | Of the patients with therapeutic intoxication, 19 were also receiving psychotropic drugs including benzodiazepines (7), phenothiazines (6), tricyclic antidepressants (5), monoamine oxidase inhibitors (3), antiparkinsonian drugs (3) haloperidol (2), tryptophan (2), and mianserin (1). However, only 5 had had any recent change in psychotropic medication (other than LTM) before admission. | Hyperreflexia, increased muscle tone (usually cogwheel in type), ataxia, tremor, confusion, agitation, and drowsiness                                                                                                                                                                                             | ...                                        |

Contd...

**Supplemental Table 2: Contd...**

| Main author             | Comorbidities besides LTM indication | LTM dose (mg) | LTM levels | Time from LTM start to symptoms | Time from management to recovery            | Follow-up | Important Ch and CM                                                                                                                                                                                                                                                                                                                                                                                                                                                                                                                                                                                                                                                                                                                                                                                                                | Neurological symptoms and clinical examination                                                                                                                                                                                                                                                                                                                                                          | Neuroimaging - CT scan, brain MRI, and EEG                                                                                        |
|-------------------------|--------------------------------------|---------------|------------|---------------------------------|---------------------------------------------|-----------|------------------------------------------------------------------------------------------------------------------------------------------------------------------------------------------------------------------------------------------------------------------------------------------------------------------------------------------------------------------------------------------------------------------------------------------------------------------------------------------------------------------------------------------------------------------------------------------------------------------------------------------------------------------------------------------------------------------------------------------------------------------------------------------------------------------------------------|---------------------------------------------------------------------------------------------------------------------------------------------------------------------------------------------------------------------------------------------------------------------------------------------------------------------------------------------------------------------------------------------------------|-----------------------------------------------------------------------------------------------------------------------------------|
| Gajkowski K             | Myocardial infarction                | ...           | ...        | ...                             | ...                                         | ...       | <p>Gastric lavage was carried out in 23 patients, and emesis induced in 3 following acute overdose. 21 patients with features of toxicity were given IV saline and 5% dextrose (14) or forced alkaline diuresis (7) for periods of 1-7 days at rates of 2-14 l/day. One other patient in whom forced alkaline diuresis was attempted developed acute renal failure which required hemodialysis on 2 successive days. Five others were given increased oral fluids only and one in whom toxicity was probably precipitated by previously undiagnosed hypothyroidism was started on thyroxin</p> <p>After withdrawal of LTM and correction of water and electrolyte disturbances as well as pharmacological treatment, gradual disappearance of neurological abnormalities was observed, with full normalization of EEG tracings</p> | PKN + amnesia                                                                                                                                                                                                                                                                                                                                                                                           | EEG was abnormal                                                                                                                  |
| Chouinard G<br>Sandyk R | ...                                  | 600 mg/day    | ...        | ...                             | 14 days after pyroxene therapy (100 mg/day) | ...       | <p>He has been receiving neuroleptic therapy since 1975 and recent medications included haloperidol (40 mg/day), and for episodic dyscontrol syndrome, LTM carbonate (600 mg/day) and carbamazepine (800 mg/day). Besides LTM and haloperidol, he was prescribed carbamazepine (800 mg/day). Following 7 days of pyridoxine therapy (100 mg/day) (in conjunction with his current medication), there was a dramatic reduction (approximately 80%) in the severity of the tremor with complete absence noted following 14 days of therapy</p>                                                                                                                                                                                                                                                                                       | <p>... Examination revealed severe bilateral upper limb PKN resting tremor with slight predominance on the right, "masked-like" face with extensive seborrheic dermatitis of the nasolabial folds and forehead, stooped posture, and absence of arm swing on walking. Blinking was generally diminished, but increased spontaneously during hallucinatory activity. The glabellar tap was positive.</p> | <p>... Cranial CT scan showed mild cortical atrophy with slightly enlarged lateral and third ventricles with no focal lesions</p> |

Contd...

**Supplemental Table 2: Contd...**

| Main author | Comorbidities besides LTM indication | LTM dose (mg) | LTM levels | Time from LTM start to symptoms | Time from management to recovery | Follow-up | Important CH and CM                                                                                                                                                                                                                                                                                                                                                                                                                                                                                                                                                                                                                                                                                             | Neurological symptoms and clinical examination                                                                                                                                                                                                                                                                                                                                                    | Neuroimaging - CT scan, brain MRI, and EEG |
|-------------|--------------------------------------|---------------|------------|---------------------------------|----------------------------------|-----------|-----------------------------------------------------------------------------------------------------------------------------------------------------------------------------------------------------------------------------------------------------------------------------------------------------------------------------------------------------------------------------------------------------------------------------------------------------------------------------------------------------------------------------------------------------------------------------------------------------------------------------------------------------------------------------------------------------------------|---------------------------------------------------------------------------------------------------------------------------------------------------------------------------------------------------------------------------------------------------------------------------------------------------------------------------------------------------------------------------------------------------|--------------------------------------------|
| Scappa S    | ...                                  | 1500 mg/day   | ...        | ...                             | ...                              | ...       | He was admitted for full-blown mania for the first time in January 1974. This was followed by further admissions in 1975. During the final admission, the administration of LTM and chlorpromazine rapidly improved his behavior, but severe PKN symptoms also occurred. An acute manic episode occurred on February 14, 1978, resulting in another admission to the hospital. Mania was controlled by administering 1500 mg of LTM, 50 mg of haloperidol, and 15 mg of procyclidine per day. He was discharged within 2 weeks. However, he was readmitted 1 month after discharge for a severe depression accompanied by TD and marked PKN. He became manic, while in the hospital, the TD and PKN disappeared | He also had mild involuntary movements of the tongue associated with choreoathetoid movements in the upper and lower extremities. Cogwheel rigidity was noted in the wrists bilaterally and neck muscles. He had frequent visual hallucinations during the examination which were associated with further augmentation of his involuntary movements, particularly tremor<br>Parkinsonian symptoms | ...                                        |

Contd...

## Supplemental Table 2: Contd...

| Main author  | Comorbidities besides LTM indication              | LTM dose (mg)                         | LTM levels                                                  | Time from LTM start to symptoms | Time from management to recovery | Follow-up | Important CH and CM                                                                                                                                                                                                                                                                                                                                                                                                                                                                                                                                                                                                                                                                                                                                                                                                | Neurological symptoms and clinical examination                                                                                                                                                    | Neuroimaging - CT scan, brain MRI, and EEG |
|--------------|---------------------------------------------------|---------------------------------------|-------------------------------------------------------------|---------------------------------|----------------------------------|-----------|--------------------------------------------------------------------------------------------------------------------------------------------------------------------------------------------------------------------------------------------------------------------------------------------------------------------------------------------------------------------------------------------------------------------------------------------------------------------------------------------------------------------------------------------------------------------------------------------------------------------------------------------------------------------------------------------------------------------------------------------------------------------------------------------------------------------|---------------------------------------------------------------------------------------------------------------------------------------------------------------------------------------------------|--------------------------------------------|
| Lecanwasam D | Congestive cardiac failure                        | 550 mg (divided 2x/day); 1500-2000 mg | 0.5-0.7 mmol/L; 3 mmol/L; 0.85 and 0.99 mmol/L              | ...                             | ...                              | He died   | 1983 - Became confuse and agitated. Received high doses of LTM (1500-2000 mg). Became comatose, generalized muscle tremor. Slurred speech, paraparesis<br>1989 - Swelling of feet, deterioration of speech, difficulty swallowing, poor mobility, gait disorder. LTM within normal range<br>1993 - Looked "parkinsonian," congestive cardiac failure, gross dysarthria, hardly intelligible speech, gait, stooped posture, parkinsonian facial expression with dribbling of saliva. Increased tone in upper and lower limbs, hyperreflexia and coarse resting tremor                                                                                                                                                                                                                                               | Deterioration of mobility, speech and difficulty swallowing. Gross dysarthria, gait, stooped posture. Increased tone in upper and lower limbs, hyperreflexia and coarse resting tremor            | ...                                        |
| Holroyd S    | Glaucoma, degenerative arthritis of the left knee | 900 mg/day; 300 mg/day                | 0.6-1.0 mmol/L; 1.1 mmol/L; 0.3-0.78 mmol/L; 0.3-0.5 mmol/L | ...                             | 5 days                           | ...       | Recurrent major depression for over 30 years. She had received various antidepressants as well as ECT. Following a successful course of ECT, she was placed on LTM in combination with nortriptyline. Start of symptoms with bradykinesia and difficulty standing over. LTM was immediately discontinued resulting in a resolution of all symptoms over a 5-day period. She then suffered a relapse of major depression requiring hospitalization and ECT. LTM was then resumed, with serum levels maintained in a range of 0.3-0.78 mmol/L. During assessment, it was noticed that she had a recurrence of micrographia, mild upper extremity tremor, and shuffling gait when the LTM level rose above 0.7 mmol/L. For this reason, LTM levels were then maintained in the 0.3-0.5 mmol/L range of 300 mg per day | Patient had the onset of bradykinesia and difficulty standing. The neurologic examination revealed severe PKN with tremor, cogwheel rigidity, bradykinesia, micrographia, and difficulty standing | EEG was normal                             |

Contd...

**Supplemental Table 2: Contd...**

| Main author | Comorbidities besides LTM indication | LTM dose (mg)  | LTM levels  | Time from LTM start to symptoms | Time from management to recovery | Follow-up                                                                                                         | Important CH and CM                                                                                                                                                                                                                                                                                                                                                                                                                                                                                                                                                                                                                                                                                                                                                                                                                                                                                                | Neurological symptoms and clinical examination                                                                                                                                                                                                        | Neuroimaging - CT scan, brain MRI, and EEG |
|-------------|--------------------------------------|----------------|-------------|---------------------------------|----------------------------------|-------------------------------------------------------------------------------------------------------------------|--------------------------------------------------------------------------------------------------------------------------------------------------------------------------------------------------------------------------------------------------------------------------------------------------------------------------------------------------------------------------------------------------------------------------------------------------------------------------------------------------------------------------------------------------------------------------------------------------------------------------------------------------------------------------------------------------------------------------------------------------------------------------------------------------------------------------------------------------------------------------------------------------------------------|-------------------------------------------------------------------------------------------------------------------------------------------------------------------------------------------------------------------------------------------------------|--------------------------------------------|
| Northcott C | ...                                  | 600-900 mg/day | ...         | ...                             | ...                              | At the time of his discharge, there was a significant reduction in his PKN symptoms but not to a pre-morbid level | 28-year history of BD characterized by 3 previous manic episodes in 1966, 1968, 1981, but no depressions. Presented in January 1994 in a manic state and was near immobilizing bradykinesia. His euthymic mood had been maintained from 1981 to 1990 on prophy/lactic chlorpromazine (150 mg per day) and from 1990 to June 1993 with LTM carbonate (300 mg/day). In the early December 1993, he began to exhibit elevated mood which progressed over the next 4 weeks to mania with grandiose delusions despite a decrease in Sinemet CR (one tablet per day). His bradykinesia and rigidity worsened, but he was still feeding himself and mobile without aids. Because of worsening manic symptoms, he was hospitalized in early January 1994 and started on LTM carbonate (600 mg increased to 900 mg per day over 1 week), clonazepam (4 mg/day), and Sinemet CR 200/150 was increased to two tablets per day | Unilateral hand tremor and generalized rigidity. He was diagnosed with Stage III Parkinson's disease in October 1993 and commencement of Sinemet CR 200/150 (2.5 tablets per day) led to an attenuation of his Parkinson's symptoms within a few days | ...                                        |
| Aguilar M   | ...                                  | 1200 mg/day    | 0.63 mmol/L | 3 weeks                         | 2 weeks                          | ...                                                                                                               | He was treated with neuroleptic drugs (haloperidol 40 mg/day, chlorpromazine 300 mg/day) and LTM carbonate 1200 mg/day. 3 weeks later he developed PSP syndrome                                                                                                                                                                                                                                                                                                                                                                                                                                                                                                                                                                                                                                                                                                                                                    | Rigidity with axial predominance, bradykinesia, supranuclear vertical gaze palsy, pseudobulbar palsy together with subcortical dementia (memory disturbance, visuospatial deficits, impairment of executive functions, and bradyphrenia), and AKT     | ...                                        |
| Jimenez F   | ...                                  | ...            | ...         | ...                             | ...                              | ...                                                                                                               | ...                                                                                                                                                                                                                                                                                                                                                                                                                                                                                                                                                                                                                                                                                                                                                                                                                                                                                                                | Several medications about drug-induced PKN were analyzed. There were no specified data about those patients who used LTM                                                                                                                              | ...                                        |

Contd...

**Supplemental Table 2: Contd...**

| Main author    | Comorbidities besides LTM indication | LTM dose (mg) | LTM levels                     | Time from LTM start to symptoms | Time from management to recovery | Follow-up | Important CH and CM                                                                                                                                                                                                                                                                                                                                                                                                                                                                                                                                                                                                       | Neurological symptoms and clinical examination                                                                                                                                                                                                                                                                                                                                                                  | Neuroimaging - CT scan, brain MRI, and EEG                             |
|----------------|--------------------------------------|---------------|--------------------------------|---------------------------------|----------------------------------|-----------|---------------------------------------------------------------------------------------------------------------------------------------------------------------------------------------------------------------------------------------------------------------------------------------------------------------------------------------------------------------------------------------------------------------------------------------------------------------------------------------------------------------------------------------------------------------------------------------------------------------------------|-----------------------------------------------------------------------------------------------------------------------------------------------------------------------------------------------------------------------------------------------------------------------------------------------------------------------------------------------------------------------------------------------------------------|------------------------------------------------------------------------|
| Fallegatter AJ | ...                                  | ...           | ... (therapeutic serum levels) | ...                             | ...                              | ...       | In contrast to previous reports, the casual role LTM was underscored by symptom increase after LTM re-exposure at therapeutic serum levels. The patient recovered completely after cessation of the LTM                                                                                                                                                                                                                                                                                                                                                                                                                   | Disorientation, aphasia, ideational apraxia, restlessness, and severe sleep disorder                                                                                                                                                                                                                                                                                                                            | ...                                                                    |
| Wils V         | ...                                  | ...           | 0.6-0.8 mEq/L                  | 10 days                         | ...                              | ...       | VPA was started and titrated to 750 mg/day (blood levels 48-52 mg/L, with 50-90 mg/L being the therapeutic range for anticonvulsant activity). Other prescribed drugs were acetylsalicylic acid, captopril, metformin, and lormetazepam. Doses of all medication were kept unchanged, and no antipsychotics were administered. 10 days after reaching the final dose of VPA, sedation, cogwheel rigidity, shuffling gait, dysarthria, drooling, and dysphagia were noted. PKN increased in severity over the next 10 days, eventually necessitating the withdrawal of VPA. The EPSs proved reversible, but mania relapsed | Sedation, cogwheel rigidity, shuffling gait, dysarthria, drooling, and dysphagia                                                                                                                                                                                                                                                                                                                                | ...                                                                    |
| Dallocchio C   | ...                                  | 600 mg/day    | 3.7 mmol/L                     | ...                             | 2 weeks                          | ...       | Treated with LTM 600 mg/day for 1 year (a month before the serum LTM concentration was 0.8 mmol/L) was referred to our hospital service because of the recent appearance of psychomotor slowness, difficulty in walking, and tremor of the limbs. LTM was withdrawn, and 3 months later, it was resumed with lower doses                                                                                                                                                                                                                                                                                                  | Psychomotor slowness, difficulty in walking, and tremor of the limbs. Psychic slowness without significant cognitive impairment, a clear upward gaze palsy (without a supranuclear component), severe bradykinesia, and severe rigidity of the fore limbs with positive cogwheel phenomenon, rest, and postural tremor with mild amplitude and frequency of 4-5 Hz in all limbs, predominantly on the left side | EEG, chest X-rays, electrocardiograph, and cranial CT scan were normal |

Contd...

## Supplemental Table 2: Contd...

| Main author | Comorbidities besides LTM indication                                                   | LTM dose (mg)  | LTM levels    | Time from LTM start to symptoms | Time from management to recovery | Follow-up            | Important CH and CM                                                                                                                                                                                                                                                                                                                                                                                                                                                                                                                                                                                                                                                                                      | Neurological symptoms and clinical examination                                                                                                                                   | Neuroimaging - CT scan, brain MRI, and EEG |
|-------------|----------------------------------------------------------------------------------------|----------------|---------------|---------------------------------|----------------------------------|----------------------|----------------------------------------------------------------------------------------------------------------------------------------------------------------------------------------------------------------------------------------------------------------------------------------------------------------------------------------------------------------------------------------------------------------------------------------------------------------------------------------------------------------------------------------------------------------------------------------------------------------------------------------------------------------------------------------------------------|----------------------------------------------------------------------------------------------------------------------------------------------------------------------------------|--------------------------------------------|
| Luby ED     | Carcinoma of the breast, sick sinus syndrome, parathyroid adenoma                      | 900-1500 mg qd | 0.6-0.9 mEq/L | ...                             | ...                              | ...                  | History of BD and LTM intolerance. During another trial with LTM, she became depressed, disoriented, and confused                                                                                                                                                                                                                                                                                                                                                                                                                                                                                                                                                                                        | Unsteady gait, psychomotor retardation, coarse tremor, and positive Romberg sign                                                                                                 | ...                                        |
|             | Hypothyroidism secondary to LTM therapy. Colon cancer and chronic lymphocytic leukemia | 900 mg         | 0.5-1.0 mEq/L | 19 years approximately          | ...                              | ...                  | Following this taper with LTM, he cycled into a major depressive episode, and he was started on bupropion 300 mg qd and VPA 750 mg qd. Subsequently, his neurologist added amantadine 100 mg tid for his PKN symptoms. The discontinuation of LTM did not result in a remission in his PKN                                                                                                                                                                                                                                                                                                                                                                                                               | PKN symptoms as shuffling gait, hand tremor, and mask-like facies                                                                                                                | ...                                        |
|             | LTM-induced intersittial nephritis                                                     | 900 mg         | 0.4-1.0 mEq/L | ...                             | ...                              | ...                  | At the initiation of treatment, she presented with symptoms of mania with pressured speech and irritability. She was on imipramine 75 mg qd. She was started on LTM 900 mg qd and imipramine was discontinued. She developed ATX with hand tremor while on 900 mg, and the dose was reduced to 600 mg qd and has been maintained since that time. During the past 2 years, her creatinine level has gradually been increasing, and her nephrologist diagnosed a LTM-induced intersittial nephritis                                                                                                                                                                                                       | ATX, hand tremor                                                                                                                                                                 | ...                                        |
| Kaplan PW   | ...                                                                                    | ...            | 1.5 mEq/L     | ...                             | 8 days                           | Improved over 8 days | Management was ICU hydration treated infection. Other medications: Synthroid                                                                                                                                                                                                                                                                                                                                                                                                                                                                                                                                                                                                                             | Dysarthria, mutism, rigidity, corticospinal signs, tremor                                                                                                                        | EEG showed rhythmic anterior delta         |
| Koener B    | ...                                                                                    | ...            | ...           | ...                             | 3 months                         | ...                  | The patient was treated with LTM at therapeutic rates for 25 years and olanzapine for 1 year. 3 years before, she received risperidone for several months. Because the patient reported being unsatisfied, diurnal tiredness, increase of appetite, and weight gain, olanzapine was substituted to amisulpride up to 200 mg/day. 1 month later, amisulpride was progressively discontinued, since weight gain was persistent, and aripiprazole (5 mg and then 10 mg) was started. Rapidly, an akineto-hypertonic parkinsonian syndrome developed in the patient, with shaking of her upper limbs and stiffness of her four limbs, impeding her from lying down, getting up, walking, and feeding herself | Akineto-hypertonic parkinsonian syndrome with shaking of the upper limbs and stiffness of her four limbs, impeding her from lying down, getting up, walking, and feeding herself | ...                                        |

Contd...



**Supplemental Table 2: Contd...**

| Main author | Comorbidities besides LTM indication                                                              | LTM dose (mg) | LTM levels | Time from LTM start to symptoms | Time from management to recovery                                                        | Follow-up                                                                                     | Important CH and CM                                                                                                                                                                                                                                                                                                                                                                                                                                                                                                                                                                                                                                                                                                        | Neurological symptoms and clinical examination                                                                                                                                                                         | Neuroimaging - CT scan, brain MRI, and EEG |
|-------------|---------------------------------------------------------------------------------------------------|---------------|------------|---------------------------------|-----------------------------------------------------------------------------------------|-----------------------------------------------------------------------------------------------|----------------------------------------------------------------------------------------------------------------------------------------------------------------------------------------------------------------------------------------------------------------------------------------------------------------------------------------------------------------------------------------------------------------------------------------------------------------------------------------------------------------------------------------------------------------------------------------------------------------------------------------------------------------------------------------------------------------------------|------------------------------------------------------------------------------------------------------------------------------------------------------------------------------------------------------------------------|--------------------------------------------|
| Shen HC     | Renal insufficiency, urinary tract infection, hyperparathyroidism, nephrogenic diabetes insipidus | 400 mg/day    | 3.6 mEq/L  | 10 years                        | ...                                                                                     | 1 month later, apart from the residual EPSs and mania, her condition was otherwise stationary | She was treated with LTM for 10 years. She was found to have a high serum level of intact parathyroid hormone: 135.0 pg/ml and a suspicious parathyroid adenoma. Polyuria with hypernatremia was also noted. A water deprivation test confirmed nephrogenic diabetes insipidus. After correction of electrolyte imbalance and reduction of LTM level, her consciousness recovered. Her PKN features were responsive to levodopa 400 mg/day in 2 divided doses                                                                                                                                                                                                                                                              | Hand tremor, psychomotor slowness, and difficulty walking. On arrival, she presented with significant cognitive impairment, masked face, severe bradykinesia, rigidity of four limbs, and postural tremor in all limbs | Cranial CT scan was normal                 |
| Aguilar LG  | ...                                                                                               | ...           | ...        | 71.4 months (mean)              | ...                                                                                     | ...                                                                                           | ...                                                                                                                                                                                                                                                                                                                                                                                                                                                                                                                                                                                                                                                                                                                        | Study that assessed drug-induced PKN. Of 55 individuals reported, 13 used LTM. No specific details are described                                                                                                       | ...                                        |
| Sarma GR    | ...                                                                                               | ...           | ...        | 12 years                        | ...                                                                                     | ...                                                                                           | His LTM levels were normal, and he was given ropinirole, levodopa, and amantadine with no relief. His LTM levels after 3 months were found elevated. His PKN completely resolved after stopping LTM                                                                                                                                                                                                                                                                                                                                                                                                                                                                                                                        | Postural tremors, rigidity, postural imbalance, and bradykinesia                                                                                                                                                       | ...                                        |
| Huang YC    | Diabetes mellitus                                                                                 | 800 mg/day    | 0.7 mEq/L  | 2 days                          | 3 days later after discontinuation of aripiprazole, 9 days after discontinuation of LTM | There was no more EPS in the following 9 months                                               | She had a history of risperidone-induced PKN, which was subsided after the drug was discontinued. This time, she was hospitalized due to agitation, outside wandering, irritable mood, auditory hallucination, and referential delusion. Haloperidol was administered on the day of hospitalization, gradually titrated to 7.5 mg/day. Trihexyphenidyl 6 mg/day was also used to prevent EPSs. Eight days after hospitalization, LTM 900 mg/day was added due to incessant irritability and hyperactivity. However, mild muscle rigidity, bilateral hands and right leg tremor, and bradykinesia were observed 2 days after LTM was added. In addition, polyuria and polydipsia were observed 7 days after the use of LTM. | Mild muscle rigidity, bilateral hands and right leg tremor, and bradykinesia. Tonic lateral flexion of trunk. Mild retrocollis was also noted while standing or sitting                                                | Cranial CT scan was normal                 |

Contd...

**Supplemental Table 2: Contd...**

| Main author  | Comorbidities besides LTM indication | LTM dose (mg) | LTM levels                                                     | Time from LTM start to symptoms | Time from management to recovery                                                                                                                                                                      | Follow-up | Important CH and CM                                                                                                                                                                                                                                                                                                                                                                                                                                                                                                                                                                                                                                                                                                                        | Neurological symptoms and clinical examination                                                                                                                                                                                                                                                                                                                                                                                                                                                                                                                      | Neuroimaging - CT scan, brain MRI, and EEG |
|--------------|--------------------------------------|---------------|----------------------------------------------------------------|---------------------------------|-------------------------------------------------------------------------------------------------------------------------------------------------------------------------------------------------------|-----------|--------------------------------------------------------------------------------------------------------------------------------------------------------------------------------------------------------------------------------------------------------------------------------------------------------------------------------------------------------------------------------------------------------------------------------------------------------------------------------------------------------------------------------------------------------------------------------------------------------------------------------------------------------------------------------------------------------------------------------------------|---------------------------------------------------------------------------------------------------------------------------------------------------------------------------------------------------------------------------------------------------------------------------------------------------------------------------------------------------------------------------------------------------------------------------------------------------------------------------------------------------------------------------------------------------------------------|--------------------------------------------|
| Munhoz R     | ...                                  | ...           | ...                                                            | 2.51 years                      | ...                                                                                                                                                                                                   | ...       | <p>The serum level of LTM was maintained at 0.7 mEq/L. Her manic and psychotic symptoms were persistent, so as PKN even though trihexyphenidyl 6 m/day or later biperiden 4 mg/day was used. Then, we shifted haloperidol 7.5 mg/day to aripiprazole 10 mg/day at the 15<sup>th</sup> day after hospitalization. 3 days later, her head and trunk deviated to the left side with about 10° away from midline, while bradykinesia and rigidity were still noted. LTM was discontinued 4 days after the appearance of the trunk deviation. Polyuria and polydipsia improved 5 days after the interruption of LTM. Her psychotic symptoms were well controlled by combined clozapine, haloperidol, and carbamazepine treatment</p> <p>...</p> | <p>Study that assessed drug-induced PKN. Of 120 individuals reported, 2 used LTM. No specific details are described</p> <p>Symptoms of rigidity and an altered gait, namely symptoms compatible with a diagnosis of PKN with an action tremor</p> <p>On clinical examination, reflexes were extremely brisk, of the brain and spine were with bilateral Achilles clonus. He could stand by himself, albeit barely, and the gait was ATX and unstable. A mild bradykinesia was present. He was unable to walk with a tandem gait, and Romberg sign was positive.</p> | ...                                        |
| Wairave TRWM | ...                                  | ...           | In both patients, LTM levels were within the therapeutic range | Few months, not specified       | ...                                                                                                                                                                                                   | ...       | <p>The LTM dosage was reduced gradually, and within a few months later, all neurological symptoms subsided completely</p>                                                                                                                                                                                                                                                                                                                                                                                                                                                                                                                                                                                                                  | ...                                                                                                                                                                                                                                                                                                                                                                                                                                                                                                                                                                 | ...                                        |
| Palma JA     | ...                                  | 800 mg/day    | 0.65 mEq/L                                                     | ...                             | 14 days. Reduction of carbamazepine dose to 200 mg/day led to a progressive improvement of the symptoms within the 1 <sup>st</sup> days, with a complete resolution at day 14. LTM dose was unchanged | ...       | <p>Besides LTM, he was taking carbamazepine 600 mg/day. After resolution of symptoms with carbamazepine reduction, the patient was rechallenged with carbamazepine a week later at a dose of 600 mg/day. 5 days later, ataxia and imbalance were again observed with a serum carbamazepine level (12 h postdose) of 4.98 kg/mL. Carbamazepine was held up, and 6 days later, the disturbances had again disappeared</p>                                                                                                                                                                                                                                                                                                                    | <p>Electromyography, transcranial magnetic stimulation, MRI were normal</p>                                                                                                                                                                                                                                                                                                                                                                                                                                                                                         | ...                                        |

Contd...

**Supplemental Table 2: Contd...**

| Main author      | Comorbidities besides LTM indication | LTM dose (mg) | LTM levels | Time from LTM start to symptoms | Time from management to recovery | Follow-up                                                                                                                                                                            | Important CH and CM                                                                                                                                           | Neurological symptoms and clinical examination                                                                                                                                                                                                                               | Neuroimaging - CT scan, brain MRI, and EEG                          |
|------------------|--------------------------------------|---------------|------------|---------------------------------|----------------------------------|--------------------------------------------------------------------------------------------------------------------------------------------------------------------------------------|---------------------------------------------------------------------------------------------------------------------------------------------------------------|------------------------------------------------------------------------------------------------------------------------------------------------------------------------------------------------------------------------------------------------------------------------------|---------------------------------------------------------------------|
| Shprecher D      | ...                                  | ...           | ...        | ...                             | ...                              | At 6- and 12-month follow-up, dysphagia and dysarthria were markedly improved. Gait improved modestly after intensive physical therapy, though she remained unstable on pull testing | She was found to have a toxic LTM level and had dramatic improvement of all symptoms, except postural instability, after LTM was discontinued in favor of VPA | There was no Babinski sign, and tone and strength appeared to be preserved in all muscle groups. He exhibited bilateral upper limb distal intention tremor, predominantly in the right extremity in finger-to-nose testing. Finger numbness or limb paresthesias were absent | Cranial CT scan showed significant bilateral frontotemporal atrophy |
| Bondon-Guitton E | ...                                  | ...           | ...        | ...                             | ...                              | ...                                                                                                                                                                                  | ...                                                                                                                                                           | Study that assessed spontaneous notifications of drug-induced PKN to a French regional pharmacovigilance center between 1993 and 2009. Of 155 notifications, 4 were about LTM. No specific details are described                                                             | ...                                                                 |

Contd...

## Supplemental Table 2: Contd...

| Main author | Comorbidities besides LTM indication | LTM dose (mg)   | LTM levels | Time from LTM start to symptoms | Time from management to recovery   | Follow-up                                                                                                                        | Important CH and CM                                                                                                                                                                                                                                                                                                                                                                                                                                                                                                                                                                                                                                                                                                                                                                                                                                                                                                                                                                                                                                                                                                                                             | Neurological symptoms and clinical examination                                                                                                                                                                                                                                                                                                                                                                                                                                                                                                                                                                | Neuroimaging - CT scan, brain MRI, and EEG |
|-------------|--------------------------------------|-----------------|------------|---------------------------------|------------------------------------|----------------------------------------------------------------------------------------------------------------------------------|-----------------------------------------------------------------------------------------------------------------------------------------------------------------------------------------------------------------------------------------------------------------------------------------------------------------------------------------------------------------------------------------------------------------------------------------------------------------------------------------------------------------------------------------------------------------------------------------------------------------------------------------------------------------------------------------------------------------------------------------------------------------------------------------------------------------------------------------------------------------------------------------------------------------------------------------------------------------------------------------------------------------------------------------------------------------------------------------------------------------------------------------------------------------|---------------------------------------------------------------------------------------------------------------------------------------------------------------------------------------------------------------------------------------------------------------------------------------------------------------------------------------------------------------------------------------------------------------------------------------------------------------------------------------------------------------------------------------------------------------------------------------------------------------|--------------------------------------------|
| Caykoylu A  | ...                                  | 600-1200 mg/day | 0.83 mEq/L | 1 week                          | 1 week after stopping aripiprazole | During the follow-up, after stopping aripiprazole and biperiden, there was no reemergence of EPS including PKN, AKT, and bruxism | Admitted in first mania episode. Aripiprazole was started at a dosage of 5 mg/day, which was titrated up to 15 mg/day in 2 weeks. Concomitantly, LTM carbonate was started at a dosage of 600 mg/day, which was gradually titrated up to 1200 mg/day. Developed bruxism of mixed typed - both grinding and clenching. Subsequently, aripiprazole and tooth pain, was reduced to 10 mg/day and lorazepam 2.5 mg/day (per os) was added to ongoing medication. After 3 days under this treatment, the patient noted partial improvement in her AKT and bruxism. Subsequently, biperiden, per os at a dose of 2 mg/day, was added to her treatment regimen, aripiprazole was reduced to 5 mg/day, and lorazepam was gradually stopped. On the 5 <sup>th</sup> day of treatment with aripiprazole at 5 mg/day, biperiden at 2 mg/day, and LTM at 1200 mg/day, there was a significant improvement in her PKN, bruxism, and AKT symptoms. It was decided to completely stop administration of aripiprazole. At the end of the 1 <sup>st</sup> week after stopping the aripiprazole, we observed that her bruxism, PKN, and AKT symptoms had been completely resolved | Bruxism of mixed typed (both grinding and clenching). Her complaints included masseter tightness, headaches, and tooth pain. These involuntary movements were observed only while she was awake. They were regular and rhythmic and would disappear while eating and speaking. Increased leg movements and body rocking. The patient was diagnosed as having bruxism accompanied with drug-associated AKT. Her total score on the BARS was 11. PKN symptoms such as bilateral resting hand tremor, parkinsonian gait, bradykinesia, and rigidity were found in her clinical examination. Her SAS score was 14 | Brain MRI and EEG were normal              |

Contd...

## Supplemental Table 2: Contd...

| Main author | Comorbidities besides LTM indication | LTM dose (mg) | LTM levels | Time from LTM start to symptoms | Time from management to recovery                                                                                                                                                              | Follow-up                                                                                                                                                                     | Important CH and CM                                                                                                                                                                                                              | Neurological symptoms and clinical examination                                                                                                                                                                                                                                                                                                                                                                                                                                                                                          | Neuroimaging - CT scan, brain MRI, and EEG                                                                                                                                                                                                                                              |
|-------------|--------------------------------------|---------------|------------|---------------------------------|-----------------------------------------------------------------------------------------------------------------------------------------------------------------------------------------------|-------------------------------------------------------------------------------------------------------------------------------------------------------------------------------|----------------------------------------------------------------------------------------------------------------------------------------------------------------------------------------------------------------------------------|-----------------------------------------------------------------------------------------------------------------------------------------------------------------------------------------------------------------------------------------------------------------------------------------------------------------------------------------------------------------------------------------------------------------------------------------------------------------------------------------------------------------------------------------|-----------------------------------------------------------------------------------------------------------------------------------------------------------------------------------------------------------------------------------------------------------------------------------------|
| Mazzini L   | ...                                  | 300 mg/day    | 0.31 mEq/L | 3 months                        | 8 months after LTM discontinuation, the extrapyramidal features significantly improved, only gait persisted. However, spasticity severely worsened and functional status was largely impaired | ...                                                                                                                                                                           | Associated medications were riluzole 100 mg/day, $\alpha$ -tocopherol 900 mg/day, and trihexyphenidyl 4 mg/day (symptomatic of sialorrhea). LTM was immediately discontinued. A therapeutic attempt with L-dopa was unsuccessful | Before starting LTM, on neurological examination, we found mild atrophy and fasciculation of the tongue, severe dysarthria, and mild dysphagia. Jaw jerk and glabellar tap were absent. Light lower limb muscle weakness, rare diffused fasciculations, and normal muscle tone were detected. After 3 months of starting LTM, neurological examination showed festinating gait, diffuse bradykinesia, severe stiffness, and positive cogwheel phenomenon both in the upper and lower limbs. No LTM-induced postural tremor was detected | Brain MRI showed hyperintensities of the corticospinal tract were detected bilaterally (as expected in ALS). SPECT with 1231-iodoflupano (DAT-scan) showed normal dopaminergic function in the basal ganglia. The patient also tested negative for SOD1, TDP-43, and FUS gene mutations |
| Sama JR     | ...                                  | ...           | ...        | ...                             | ...                                                                                                                                                                                           | Follow-up 4 months later, disclosed significant improvement in rigidity was noted although he had residual slowing of saccades and new left-sided intermittent resting tremor | Being treated with LTM and olanzapine. Based on the findings, olanzapine was discontinued and treatment with quetiapine was initiated                                                                                            | Bilateral postural tremor, rigidity, and stooped posture were noted. On initial neurological examination, he was also noted to have slow vertical saccades                                                                                                                                                                                                                                                                                                                                                                              | ...                                                                                                                                                                                                                                                                                     |

Contd...

## Supplemental Table 2: Contd...

| Main author     | Comorbidities besides LTM indication                                                                                  | LTM dose (mg) | LTM levels | Time from LTM start to symptoms                                                                                                                                                                                                                                                        | Time from management to recovery                                                                                                                                                           | Follow-up | Important CH and CM                                                                                                                                                                                                                                                                                                                                                                                                                                                                                                                                                                                                                     | Neurological symptoms and clinical examination                                                                                                                                                       | Neuroimaging - CT scan, brain MRI, and EEG |
|-----------------|-----------------------------------------------------------------------------------------------------------------------|---------------|------------|----------------------------------------------------------------------------------------------------------------------------------------------------------------------------------------------------------------------------------------------------------------------------------------|--------------------------------------------------------------------------------------------------------------------------------------------------------------------------------------------|-----------|-----------------------------------------------------------------------------------------------------------------------------------------------------------------------------------------------------------------------------------------------------------------------------------------------------------------------------------------------------------------------------------------------------------------------------------------------------------------------------------------------------------------------------------------------------------------------------------------------------------------------------------------|------------------------------------------------------------------------------------------------------------------------------------------------------------------------------------------------------|--------------------------------------------|
| Babinsky E      | MSA, coronary artery disease, hypercholesterolemia, hypothyroidism, COPD, history of cholecystectomy, and sleep apnea | 900 mg/day    | 1.1 mEq/L  | Over the past 2 years, the patient had complained of worsening ATX, weakness, feeling dizzy, and intractable vomiting for which he was seen at a local tertiary hospital. The patient had also complained of a 30-pound weight loss over the prior 6 months, as well as some dysphasia | Within 3 months after discontinuation of LTM, his symptoms disappeared to the point that he was able to walk independently and had a significant improvement with his intractable vomiting | ...       | He reported a significant adverse reaction to olanzapine when it was given in its combination form, Symbax, a combination drug of olanzapine and fluoxetine manifested by difficulty walking and feeling weak. These symptoms had resolved following discontinuation of Symbax. He used: Levothyroxine 0.175 mg/day, ezetimibe 10 mg/day, celecoxib 200 mg PRN daily (headache), dutasteride 0.5 mg/day, atorvastatin 40 mg/day, tamsulosin 0.4 mg/day, LTM 900 mg/day, fluoxetine 40 mg/day, aspirin 81 mg/day, bupropion 200 mg twice daily, and esomeprazole 40 mg/day. On realizing the toxicity of LTM, the medication was stopped | Slowly progressive akinesia, rigidity, and shuffling gait were noted. During her assessment, she was also noted to have a stare, slow vertical saccades, axial stiffness, and positive applause sign | Brain MRI and EEG were normal              |
| Bhattacharjee S | ...                                                                                                                   | ...           | ...        | The patient showed signs of tremor in the hands for 6 years, but it worsened in the last 6 months; tremors started after 2 months of the use of LTM                                                                                                                                    | ...                                                                                                                                                                                        | ...       | On examination, he had asymmetrical (left > right), rest and postural tremor in both of his hands, with rigidity and bradykinesia in both hands (left > right). There was no gauze restriction, autonomic dysfunction, or focal neurological deficit                                                                                                                                                                                                                                                                                                                                                                                    | ...                                                                                                                                                                                                  |                                            |

Contd...

**Supplemental Table 2: Contd...**

| Main author      | Comorbidities besides LTM indication                       | LTM dose (mg) | LTM levels                 | Time from LTM start to symptoms | Time from management to recovery                                                                                                                                      | Follow-up                                                                                                                                                                                                                                          | Important Ch and CM                                                                                                                                                                                                                                                                                                                                                                                                                                                                                                                                                                                                                                                 | Neurological symptoms and clinical examination                                                                                                                                                                                                                                                             | Neuroimaging - CT scan, brain MRI, and EEG                                                                                                                                                 |
|------------------|------------------------------------------------------------|---------------|----------------------------|---------------------------------|-----------------------------------------------------------------------------------------------------------------------------------------------------------------------|----------------------------------------------------------------------------------------------------------------------------------------------------------------------------------------------------------------------------------------------------|---------------------------------------------------------------------------------------------------------------------------------------------------------------------------------------------------------------------------------------------------------------------------------------------------------------------------------------------------------------------------------------------------------------------------------------------------------------------------------------------------------------------------------------------------------------------------------------------------------------------------------------------------------------------|------------------------------------------------------------------------------------------------------------------------------------------------------------------------------------------------------------------------------------------------------------------------------------------------------------|--------------------------------------------------------------------------------------------------------------------------------------------------------------------------------------------|
| Alonso-Canovas A | ...                                                        | ...           | ...                        | ...                             | ...                                                                                                                                                                   | ...                                                                                                                                                                                                                                                | ...                                                                                                                                                                                                                                                                                                                                                                                                                                                                                                                                                                                                                                                                 | Study that determines whether transcranial ultrasound may help predict response to withdrawal of the offending drug in drug-induced PKN. Of 74 individuals, 1 was about LTM                                                                                                                                | ...                                                                                                                                                                                        |
| Basile G         | Severe hypothyroidism, hypertension, and diabetes mellitus | 600 mg/day    | ...                        | ...                             | 5 months                                                                                                                                                              | ...                                                                                                                                                                                                                                                | She was affected by mild mental retardation, with a BD for the past about 40 years and was treated chronically with carbonate LTM 600 mg/day and clomipramine 75 mg/day. For the past 20 years, she was also affected by hypertension and diabetes mellitus, which were treated, respectively, with valsartan/hydrochlorothiazide 160/125 mg/day and glimepiride 2 mg/day. LTM treatment was gradually reduced and, after short period, discontinued. Treatment with levohydroxine and saline solution IV was readily performed, and valsartan/hydrochlorothiazide was replaced with amlodipine 5 mg/day as they were identified as potential interactants with LTM | Tremor, bradykinesia, rigidity, postural instability/ATX, lethargy, and bradycardia                                                                                                                                                                                                                        | Brain MRI showed mild cortico-subcortical atrophy. FP-CIT SPECT showed significant decrease of DAT uptake. A 18F-Dopa PET was performed and revealed normal nigrostriatal terminal density |
| Cilia R          | ...                                                        | 600 mg/day    | Serum LTM level was normal | ...                             | After 1 month of the switch to low-dose aripiprazole (2.5 mg/day), her motor symptoms greatly improved and all borderline cognitive testing scores reversed to normal | A 9-months follow-up. SPECT scan showed an increase in binding values within the normal range. Neurological examination revealed a further improvement in motor symptoms and her activities of daily living and quality of life reversed to normal | Used LTM + SSRI + benzodiazepines. Patient had a 4-year history of bilateral hand tremor and gait disturbance with freezing and unbalance leading to frequent falling, worsened further over the last 6 months. She was not taking any anti-PD medication; levodopa therapy for 12 months was unsuccessful. The switch to low-dose aripiprazole (2.5 mg/day) adequately compensated her psychiatric symptoms without influencing central dopaminergic transmission. After 1 month, her motor symptoms greatly improved (UPDRS-III 17/108) and all borderline cognitive testing scores reversed to normal                                                            | Neurological examination showed hypomimia, hypophonia and dysarthria, bilateral postural and rest tremor in the upper limbs, moderate-severe bilateral bradykinesia and muscle rigidity, normal DTRS, shuffling gait with freezing and absent arm swings, flexed posture with impaired postural stability. | Brain MRI showed mild cortico-subcortical atrophy. FP-CIT SPECT showed significant decrease of DAT uptake. A 18F-Dopa PET was performed and revealed normal nigrostriatal terminal density |

Contd...

**Supplemental Table 2: Contd...**

| Main author  | Comorbidities besides LTM indication | LTM dose (mg) | LTM levels | Time from LTM start to symptoms | Time from management to recovery | Follow-up                                                                                                                                                                                                                                                                                                                        | Important CH and CM | Neurological symptoms and clinical examination                                                                                                                                                                                                                                                                                                                                                                                   | Neuroimaging - CT scan, brain MRI, and EEG |
|--------------|--------------------------------------|---------------|------------|---------------------------------|----------------------------------|----------------------------------------------------------------------------------------------------------------------------------------------------------------------------------------------------------------------------------------------------------------------------------------------------------------------------------|---------------------|----------------------------------------------------------------------------------------------------------------------------------------------------------------------------------------------------------------------------------------------------------------------------------------------------------------------------------------------------------------------------------------------------------------------------------|--------------------------------------------|
| Irons R      | ...                                  | ...           | ...        | ...                             | ...                              | A 24-month follow-up scan showed a further increase in DAT density and no remarkable clinical sign of PKN                                                                                                                                                                                                                        | ...                 | UPDRS-III 42/108, Hoehn and Yahr stage 3/5. Global cognition was normal (MMSE 28.2/30) but frontal lobe executive functions were mildly impaired<br>No specific detail was described.<br>Indication for DaT was no benefit from levodopa. However, the DaT scan was negative<br>Study that assessed ...<br>modern mood stabilizers and the occurrence of movement disorders. In 2 individuals, the probable cause of PKN was LTM | DaT scan was normal                        |
| Vandewalle W | ...                                  | ...           | ...        | ...                             | ...                              | ...                                                                                                                                                                                                                                                                                                                              | ...                 | Her physical examination showed masked facies, postural tremors, resting and kinetic tremors in both upper and lower extremities neck rigidity, and moderate upper limb rigidity with cogwheeling. She had bradykinesia with freezing of gait. UPDRS was initially 52. Baseline MOCA was 10                                                                                                                                      | DaT scan was positive to drug-induced PKN  |
| Glass OM     | ...                                  | ...           | ...        | ...                             | ...                              | PKN decreased as the LTM level was reduced to a range between 0.62 and 0.73 mEq/L. Specifically, the patient no longer had freezing of gait, her gait was less stooped, her tremors and posture improved. The patient's mood also remained stable on the lower serum LTM level. MOCA score improved to 19. UPDRS decreased to 24 | ...                 | ...                                                                                                                                                                                                                                                                                                                                                                                                                              | ...                                        |

Contd...



**Supplemental Table 2: Contd...**

| Main author | Comorbidities besides LTM indication | LTM dose (mg) | LTM levels | Time from LTM start to symptoms | Time from management to recovery | Follow-up | Important Ch and CM                                                                                                                                                                                                                                                                                                                                                                                                                                                                                                                                                                                                                                                                                                                                                                               | Neurological symptoms and clinical examination                                                                                                                                                                                                                                                                                                                                                                             | Neuroimaging - CT scan, brain MRI, and EEG |
|-------------|--------------------------------------|---------------|------------|---------------------------------|----------------------------------|-----------|---------------------------------------------------------------------------------------------------------------------------------------------------------------------------------------------------------------------------------------------------------------------------------------------------------------------------------------------------------------------------------------------------------------------------------------------------------------------------------------------------------------------------------------------------------------------------------------------------------------------------------------------------------------------------------------------------------------------------------------------------------------------------------------------------|----------------------------------------------------------------------------------------------------------------------------------------------------------------------------------------------------------------------------------------------------------------------------------------------------------------------------------------------------------------------------------------------------------------------------|--------------------------------------------|
| Hermida AP  | Parkinson disease                    | 1200 mg/day   | ...        | ...                             | ...                              | ...       | Despite a 40-year history of BD, the patient had remained stable on LTM with occasional irritability. Previous trials of mood stabilizers and augmentation agents (aripiprazole, lamotrigine, VPA, isocarboxazid, tranylcypromine, and fluphenazine) failed due to adverse effects. Her last manic episode occurred 2 years earlier, and her last inpatient psychiatric hospitalization was 14 years before our evaluation. Medications included carbidopa-levodopa 125/500 mg/day, LTM 1200 mg/day, donepezil 10 mg/day, and memantine 20/day. Her previous provider stopped risperidone 11 months before our evaluation due to worsening PD-like features. However, the discontinuation did not improve her symptomatology. Family history was negative for PD and any other movement disorders | She was experiencing worsening gait, weakness, confusion, and forgetfulness. Examination demonstrated masked face, mild-to-moderate postural/kinetic tremor in the upper extremity (left > right), slight resting tremors in both legs and arms, and moderate neck and limb rigidity. She also had moderate-to-severe bradykinesia (left > right), slow gait with freezing, and a stooped posture with decreased arm swing | ...                                        |
| Noyce AJ    | ...                                  | ...           | ...        | ...                             | ...                              | ...       | ...                                                                                                                                                                                                                                                                                                                                                                                                                                                                                                                                                                                                                                                                                                                                                                                               | Assessment of a group of people at increased risk of Parkinson's disease. One individual was excluded because he was diagnosed with drug-induced PKN                                                                                                                                                                                                                                                                       | ...                                        |
| Kumar N     | ...                                  | 1500 mg/day   | 1.1 mmol/L | ...                             | 3 months                         | ...       | ...                                                                                                                                                                                                                                                                                                                                                                                                                                                                                                                                                                                                                                                                                                                                                                                               | 2-year history of progressive left lateral truncal flexion DTN disappearing on lying supine known as Pisa syndrome, along with anterocollis and PKN                                                                                                                                                                                                                                                                        | ...                                        |

Contd...

**Supplemental Table 2: Contd...**

| Main author | Comorbidities besides LTM indication             | LTM dose (mg) | LTM levels | Time from LTM start to symptoms                                           | Time from management to recovery                                                                                                                                     | Follow-up                                                                                          | Important CH and CM                                                                                                                                                                                                                                                                                                                                                                                                                                                                                                   | Neurological symptoms and clinical examination                                                                                                                                                      | Neuroimaging - CT scan, brain MRI, and EEG           |
|-------------|--------------------------------------------------|---------------|------------|---------------------------------------------------------------------------|----------------------------------------------------------------------------------------------------------------------------------------------------------------------|----------------------------------------------------------------------------------------------------|-----------------------------------------------------------------------------------------------------------------------------------------------------------------------------------------------------------------------------------------------------------------------------------------------------------------------------------------------------------------------------------------------------------------------------------------------------------------------------------------------------------------------|-----------------------------------------------------------------------------------------------------------------------------------------------------------------------------------------------------|------------------------------------------------------|
| Aikoye SA   | Hypertension                                     | 1200 mg/day   | 2.9 mMol/L | 2 months (symptoms had worsened in the last 2 months before presentation) | 1 month (with the removal of LTM and glomerular filtration improved and the patient's cognition and neurological symptoms decreased within 3-4 weeks in the hospita) | ...                                                                                                | She was initially seen in a neurology clinic few weeks before her inpatient hospitalization, diagnosed as idiopathic Parkinson's disease. She was also on lisinopril, diclofenac, levothyroxine, atorvastatin, topiramate, and trazodone. The treatment with LTM was stopped, and replaced by L-dopa and other drugs in conjunction with the physical therapy intervention                                                                                                                                            | Rigidity, tremors, ...<br>cognitive impairment, masked facies, positive cogwheel rigidity, bradykinesia, and festinating gait                                                                       | ...                                                  |
| Chandana G  | History of varicose veins treated with a surgery | 900 mg/day    | ...        | About 6 years                                                             | ...                                                                                                                                                                  | ...                                                                                                | Admitted with chief complaint of giddiness and weakness of lower limbs for 2 months. Further, fever, muscle stiffness, and generalized body pain for 2 months were observed. He has the sign of cogwheel rigidity. It indicates the presence of tremors and the muscle rigidity                                                                                                                                                                                                                                       | Giddiness, tremor, ...<br>weakness of lower limbs, cogwheel sign                                                                                                                                    | ...                                                  |
| Cruz CC     | Hypertension and diabetes mellitus               | ...           | 3.9 mEq/L  | ...                                                                       | ...                                                                                                                                                                  | ...                                                                                                | The patient is currently under treatment with levomepromazine, VPA, and LTM. He came to the emergency department due to tremor and rigidity in extremities of 2 months of evolution. Hemodialysis has been performed. It was necessary to transfer him to the ICU, where he remained in a coma for several days. On awakening from coma, he presented a defective appearance with regressive behavior and unintelligible language, which could be due to cognitive impairment because a possible cortical involvement | Rigidity in limb mobilization, sign of positive cogwheel in wrists, dysarthria, and tremor.<br>Fluctuating level of consciousness alterations, disconnection of the medium and disorientation. Coma | Brain MRI showed diffuse cortico-subcortical atrophy |
| Florescu A  | ...                                              | ...           | ...        | 1 week                                                                    | No recovery                                                                                                                                                          | 4 months after the neuroleptic withdrawal, with persistence of the severe parkinsonism (UPDRS: 63) | The individuals had been treated for many years with LTM and olanzapine. His neuroleptics were stopped suddenly                                                                                                                                                                                                                                                                                                                                                                                                       | 1 week after the neuroleptics stopped, he presented with generalized weakness, shuffling gait, severe bradykinesia, bilateral resting tremor, and altered mental status                             | DaT scan was normal                                  |

Contd...

**Supplemental Table 2: Contd...**

| Main author | Comorbidities besides LTM indication | LTM dose (mg)                         | LTM levels                                                                                                                              | Time from LTM start to symptoms | Time from management to recovery                                 | Follow-up | Important CH and CM                                                                                                                                                                                                                                                                                                                                          | Neurological symptoms and clinical examination                                                                                                                                                                                                                                                 | Neuroimaging - CT scan, brain MRI, and EEG |
|-------------|--------------------------------------|---------------------------------------|-----------------------------------------------------------------------------------------------------------------------------------------|---------------------------------|------------------------------------------------------------------|-----------|--------------------------------------------------------------------------------------------------------------------------------------------------------------------------------------------------------------------------------------------------------------------------------------------------------------------------------------------------------------|------------------------------------------------------------------------------------------------------------------------------------------------------------------------------------------------------------------------------------------------------------------------------------------------|--------------------------------------------|
| Yomtoob J   | ...                                  | ...                                   | ...                                                                                                                                     | ...                             | ...                                                              | ...       | ...                                                                                                                                                                                                                                                                                                                                                          | Study about DaT-SPECT imaging in cases of drug-induced PKN. No specific details are described about LTM. However, they concluded that DaT-SPECT results lead to changes in management and the outcomes of these changes are consistent with scan results                                       | ...                                        |
| Shingavi S  | ...                                  | 1200 mg/day                           | ...                                                                                                                                     | 10 years                        | 5 weeks of removal of the LTM and physiotherapeutic intervention | ...       | She was on LTM 1200 mg/day for over 10 years and without any history of serum LTM check. After consultation with psychiatrist, his LTM carbonate medication was stopped and medical management for PKN with L-dopa and other medications were started along with physiotherapy intervention. Physiotherapy treatment was given for 5 times a week for 5 days | Difficulty in bed mobility, bradykinesia, weakness in bilateral upper and lower extremities, trunk instability, intentional tremors, and hypokinetic voice                                                                                                                                     | ...                                        |
| <b>DKN</b>  |                                      |                                       |                                                                                                                                         |                                 |                                                                  |           |                                                                                                                                                                                                                                                                                                                                                              |                                                                                                                                                                                                                                                                                                |                                            |
| Peters HA   | ...                                  | Intoxication                          | ...                                                                                                                                     | ...                             | ...                                                              | Recovered | ...                                                                                                                                                                                                                                                                                                                                                          | ...                                                                                                                                                                                                                                                                                            | ...                                        |
| Crews EL    | ...                                  | 1200 mg/day, then 3x/day, then 2x/day | 2.02 mEq/L (9 <sup>th</sup> day), 1.2 <sup>th</sup> day: 2.18 mEq/L, 15 <sup>th</sup> day: 1.72 mEq/L, 20 <sup>th</sup> day: 1.11 mEq/L | 11 days                         | 5 days                                                           | ...       | She had been taking trifluoperazine and benztropine mesylate, which were stopped 1 week before her admission. LTM was started on the 2 <sup>nd</sup> hospital day. Other medications were trifluoperazine and benztropine mesylate                                                                                                                           | Had motor symptoms before taking LTM (TD). Presented choreoathetosis, "fly-catcher" tongue. At admission, repetitive purposeless turning of the head, continuous athetoid movement of fingers on both hands, difficulty speaking and swallowing, hyperactivity, irritability, and rapid speech | ...                                        |

Contd...

**Supplemental Table 2: Contd...**

| Main author | Comorbidities besides LTM indication | LTM dose (mg) | LTM levels | Time from LTM start to symptoms                                           | Time from management to recovery                                                                                  | Follow-up                                                                                                                                                                         | Important CH and CM                                                                                                                                                                                                                                                                                                                                                                                                                                                                                                                                                     | Neurological symptoms and clinical examination                                                                                                                                                | Neuroimaging – CT scan, brain MRI, and EEG         |
|-------------|--------------------------------------|---------------|------------|---------------------------------------------------------------------------|-------------------------------------------------------------------------------------------------------------------|-----------------------------------------------------------------------------------------------------------------------------------------------------------------------------------|-------------------------------------------------------------------------------------------------------------------------------------------------------------------------------------------------------------------------------------------------------------------------------------------------------------------------------------------------------------------------------------------------------------------------------------------------------------------------------------------------------------------------------------------------------------------------|-----------------------------------------------------------------------------------------------------------------------------------------------------------------------------------------------|----------------------------------------------------|
| Beitman BD  | ...                                  | 900 mg/day    | 0.9 mEq/L  | 2 years                                                                   | ...                                                                                                               | ...                                                                                                                                                                               | She had facial contortions when in use of thioridazine in the past, similar to the one caused by LTM. Self-discontinued LTM at some point restarted with onset of depression 1 week latter. The DKN ceased immediately during a short trial with trihexyphenidyl. After being stabilized on 2 mg of trihexyphenidyl 3x/day for 3 months, she experienced a mild recurrence of symptoms. The interruption of the anticholinergic worsened the symptoms, and also stopping LTM, worsened it further. Both medications were resumed, and DKN was reduced but still present | Grimacing and spontaneous facial movement which increased when specific tasks involving the extremities where requested. Orofacial DKN                                                        | ...                                                |
| Stancer HC  | Chronic back pain                    | 900 mg/day    | 1.1 mEq/L  | ...                                                                       | ...                                                                                                               | These symptoms did not cease when the tranylcypromine was stopped for 12 months and LTM carbonate was given alone                                                                 | Concomitantly with the use of LTM, she used tranylcypromine, 40 mg/day                                                                                                                                                                                                                                                                                                                                                                                                                                                                                                  | Involuntary chewing movements associated with the sensation of a phantom mass lodged against the upper palate just behind the maxillary central incisors. TD not associated with neuroleptics | ...                                                |
| ...         | ...                                  | 1200 mg/day   | 1.0 mEq/L  | 18 months                                                                 | ...                                                                                                               | During the reduction of the tranylcypromine dosage, he began to complain of persistent involuntary chewing movements that had not ceased when the antidepressant was discontinued | Concomitantly with the use of LTM, he used 30 mg/day of tranylcypromine                                                                                                                                                                                                                                                                                                                                                                                                                                                                                                 | Persistent involuntary chewing started when reducing tranylcypromine. TD not associated with neuroleptics                                                                                     | ...                                                |
| Thomas CJ   | ...                                  | ...           | ...        | 2 days after starting haloperidol while already in use of LTM for 7 years | 3 months, still having evidence of organic brain damage with considerable disorientation and impairment of memory | She got evidence of severe organic brain damage with considerable disorientation and impairment of memory                                                                         | Both drugs were stopped when the symptoms occurred                                                                                                                                                                                                                                                                                                                                                                                                                                                                                                                      | Marked rigidity, which made walking unaided impossible, and continual orofacial DKN. Associated with this was a severe confusional state with total disorientation                            | EEG during the episode revealed diffuse slow waves |

Contd...

**Supplemental Table 2: Contd...**

| Main author   | Comorbidities besides LTM indication        | LTM dose (mg)     | LTM levels              | Time from LTM start to symptoms | Time from management to recovery | Follow-up | Important CH and CM                                                                                                                                                                                  | Neurological symptoms and clinical examination                                                                                                                                       | Neuroimaging - CT scan, brain MRI, and EEG |
|---------------|---------------------------------------------|-------------------|-------------------------|---------------------------------|----------------------------------|-----------|------------------------------------------------------------------------------------------------------------------------------------------------------------------------------------------------------|--------------------------------------------------------------------------------------------------------------------------------------------------------------------------------------|--------------------------------------------|
| Himmelhoch JM | ...                                         | ...               | 0.45-0.65 mEq/L         | ...                             | ...                              | ...       | ...                                                                                                                                                                                                  | Of 81 subjects, 17 patients had hard neurological illness (12 had extrapyramidal syndromes, and 5 chronic dementia). Extrapyramidal syndromes (PKN and/or facial DKN)                | ...                                        |
| Sachdeva JR   | ...                                         | ...               | ...                     | ...                             | ...                              | ...       | ...                                                                                                                                                                                                  | ...                                                                                                                                                                                  | ...                                        |
| Heim J        | ...                                         | ...               | ...                     | ...                             | ...                              | ...       | A case of permanent neurological sequelae by LTM intoxication during a thyrotoxicosis                                                                                                                | ...                                                                                                                                                                                  | ...                                        |
| Weiner WJ     | ...                                         | ...               | ...                     | ...                             | ...                              | ...       | Appearance of the movement disorder was associated with neuroleptic withdrawal                                                                                                                       | Meige-like symptoms were attributed to chronic neuroleptic use. The symptoms occurring as part of a TD suggest that dopaminergic mechanisms play a role in idiopathic Meige syndrome | ...                                        |
|               | ...                                         | ...               | ...                     | ...                             | ...                              | ...       | The movement disorder began while neuroleptic therapy continued                                                                                                                                      | Meige-like symptoms were attributed to chronic neuroleptic use. The symptoms occurring as part of a TD suggest that dopaminergic mechanisms play a role in idiopathic Meige syndrome | ...                                        |
| Lieberman A   | Parkinson disease and on-off phenomena. DPS | 975 mg/day (mean) | 0.6-1.5 mEq/L (unclear) | ...                             | ...                              | ...       | In 12 individuals with Parkinson's disease, LTM was assessed to evaluate the on-off phenomena. All 12 patients had been treated with levodopa/carbidopa (Sinemet) for a mean duration of 10.0 years. | Increased dyskinesia in 1 patient                                                                                                                                                    | ...                                        |

Contd...

**Supplemental Table 2: Contd...**

| Main author | Comorbidities besides LTM indication | LTM dose (mg) | LTM levels | Time from LTM start to symptoms | Time from management to recovery | Follow-up | Important CH and CM                                                                                                                                                                                                                                                                                                                                                                                                                                                                                                                                                                                                                                                                                                                                                                                                                                                                                                                                                                                                                                                                                                                                                                                                                                                                                                                                                                                                                                                                                                                                                                          | Neurological symptoms and clinical examination | Neuroimaging – CT scan, brain MRI, and EEG |
|-------------|--------------------------------------|---------------|------------|---------------------------------|----------------------------------|-----------|----------------------------------------------------------------------------------------------------------------------------------------------------------------------------------------------------------------------------------------------------------------------------------------------------------------------------------------------------------------------------------------------------------------------------------------------------------------------------------------------------------------------------------------------------------------------------------------------------------------------------------------------------------------------------------------------------------------------------------------------------------------------------------------------------------------------------------------------------------------------------------------------------------------------------------------------------------------------------------------------------------------------------------------------------------------------------------------------------------------------------------------------------------------------------------------------------------------------------------------------------------------------------------------------------------------------------------------------------------------------------------------------------------------------------------------------------------------------------------------------------------------------------------------------------------------------------------------------|------------------------------------------------|--------------------------------------------|
|             |                                      |               |            |                                 |                                  |           | <p>The original improvement on Sinemet had disappeared and 8 patients were worse than they had been before starting the drug. Attempts to increase levodopa aggravated on-off phenomena or increased dyskinesias, and efforts to rearrange the timing of the levodopa doses or the ratio of levodopa to carbidopa were unsuccessful. Attempts to decrease levodopa resulted in worsening of disease. The mean dose of levodopa (in Sinemet) was 813 mg (range, 200- 1400 mg) and the mean ratio of levodopa to carbidopa was 7:1 (range, 4:1-10:1). Eleven of the patients had been treated with bromocriptine and 8 had at one time improved. Bromocriptine had been discontinued in 4 because of adverse effects and in 6 because of declining efficacy. 7 patients had been treated with pergolide, all with improvement. Pergolide had been discontinued in 2 patients because of adverse effects and in another 2 because of declining efficacy. 8 patients had been treated with lisuride, and all had improved. Lisuride had been discontinued in 3 patients because of declining response. LTM carbonate was begun at a dose of 300-600 mg and was increased by 300 mg/day until therapeutic blood levels (0.6-1.5 mEq/L) were attained, within 15-30 days. Mean daily dose of LTM was 975 mg (range, 600-1200 mg). All other medications remained constant throughout the study. LTM was discontinued in 8 patients because of lack of efficacy and in 1 because of falling. LTM was continued in the other 3 patients until their improvement declined, usually after 4 months</p> |                                                |                                            |

Contd...

**Supplemental Table 2: Contd...**

| Main author | Comorbidities besides LTM indication | LTM dose (mg) | LTM levels                      | Time from LTM start to symptoms | Time from management to recovery      | Follow-up                                                                                                                                                                                                                                                       | Important CH and CM                                                                                                                                                                                                                                                                                                                                                                                                                                                                                                                                                                                                                                                                                                                                                                                                                                                                                      | Neurological symptoms and clinical examination                                                                                                                                                                                                                   | Neuroimaging - CT scan, brain MRI, and EEG                                                                                                                    |
|-------------|--------------------------------------|---------------|---------------------------------|---------------------------------|---------------------------------------|-----------------------------------------------------------------------------------------------------------------------------------------------------------------------------------------------------------------------------------------------------------------|----------------------------------------------------------------------------------------------------------------------------------------------------------------------------------------------------------------------------------------------------------------------------------------------------------------------------------------------------------------------------------------------------------------------------------------------------------------------------------------------------------------------------------------------------------------------------------------------------------------------------------------------------------------------------------------------------------------------------------------------------------------------------------------------------------------------------------------------------------------------------------------------------------|------------------------------------------------------------------------------------------------------------------------------------------------------------------------------------------------------------------------------------------------------------------|---------------------------------------------------------------------------------------------------------------------------------------------------------------|
| Lewis DA    | ...                                  | 600 mg/day    | 0.7-0.9 mEq/L;<br>0.6-0.8 mEq/L | 2 years or 24 years (unclear)   | 6 months (10 days after stopping LTM) | At 8-month follow-up, he remained free of any neurological symptoms except for the preexistent mild oromandibular DKN                                                                                                                                           | His persistent ATX and dysarthria were thought to be due to a midline cerebellar infarction. Before discontinuing LTM: Impaired coordination, ataxic, and dysarthric. Borderline-defective level on a battery of intelligence tests and memory tests, which was well below expectations based on his educational and occupational background. 10 days after discontinuing LTM: Psychometric evaluation revealed substantial improvement in intellectual (WAIS IQ, 91) and memory function (Wechsler memory quotient, 87). Other medications: Desipramine hydrochloride, 75 mg, diazepam, 15 mg at bedtime, and cimetidine, 300 mg four times daily, which had been prescribed for the treatment of insomnia and reflux esophagitis; borderline-defective level. The patient also had a 3-year history of mild, involuntary buccal-lingual movements that were attributed to previous neuroleptic therapy | ATX, dysarthria, dysdiadochokinesia                                                                                                                                                                                                                              | 2 years before, CT scan revealed mild cortical atrophy and an EEG revealed bilaterally diffuse delta slow waves and slight slowing of the background activity |
| Mann SC     | ...                                  | ...           | 1.07 mEq/L                      | 2 weeks                         | ...                                   | His DKN diminished during the period of neuroleptic treatment but then fully reemerged and has now been present for 18 months. Severe DKN developed after 7 days of combined therapy with haloperidol. He used haloperidol 5 mg 3x/day, benztropine 2 mg 1x/day | ...                                                                                                                                                                                                                                                                                                                                                                                                                                                                                                                                                                                                                                                                                                                                                                                                                                                                                                      | Eye blinking, shoulder shrugging, buccolingual masticatory movements, facial tics, head nodding, shoulder shrugging, truncal torsion movement, and choreoathetoid movements of the fingers, wrists, and toes. Further, it was observed cogwheel rigidity and AKT | Cranial CT scan and EEG were normal                                                                                                                           |
| Manor E     | ...                                  | ...           | 3.9 mEq/L                       | ...                             | ...                                   | 2 years later, she was still ataxic and had sporadic choreoathetoid movements                                                                                                                                                                                   | She had alternating paroxysmal atrial fibrillation and sinus-node abnormalities with prolonged pauses of sinus arrest. During these pauses, nodal escape beats and nodal rhythm appeared. After peritoneal dialysis, the cardiac rhythm reverted to normal                                                                                                                                                                                                                                                                                                                                                                                                                                                                                                                                                                                                                                               | Impaired consciousness, twitching, and fasciculation characterized by the author as DKNs                                                                                                                                                                         | ...                                                                                                                                                           |

Contd...

**Supplemental Table 2: Contd...**

| Main author         | Comorbidities besides LTM indication   | LTM dose (mg)                      | LTM levels      | Time from LTM start to symptoms                                                                        | Time from management to recovery                                                                                                                                                                                                                     | Follow-up                                                                                                                                                                                                                       | Important CH and CM                                                                                                                                                                                                                                                            | Neurological symptoms and clinical examination                                                                                                                                 | Neuroimaging - CT scan, brain MRI, and EEG |
|---------------------|----------------------------------------|------------------------------------|-----------------|--------------------------------------------------------------------------------------------------------|------------------------------------------------------------------------------------------------------------------------------------------------------------------------------------------------------------------------------------------------------|---------------------------------------------------------------------------------------------------------------------------------------------------------------------------------------------------------------------------------|--------------------------------------------------------------------------------------------------------------------------------------------------------------------------------------------------------------------------------------------------------------------------------|--------------------------------------------------------------------------------------------------------------------------------------------------------------------------------|--------------------------------------------|
| Rao AV              | ...                                    | 750-1000 mg/day divided in 3 doses | 0.6-1.2 mEq/L   | The duration of therapy ranged from 3 months to 6 years. Symptoms appeared between 3 months and 1 year | In 7 patients, the tremors were controlled with 40 mg propranolol per day which was discontinued after 2-3 months and tremors did not recur. In others, the magnitude of the tremors diminished over time and settled without any measure to counter | ...                                                                                                                                                                                                                             | ...                                                                                                                                                                                                                                                                            | Tremors (26.6%), polyuria (20%), salivation, nausea and abdominal discomfort; weight gain, memory defects, hypothyroidism, TD, acne and hair fall, gait. Fine tremor, DKN, ATX | ...                                        |
| Standish-Barry HMAS | ...                                    | ...                                | 0.79-1.24 mEq/L | ...                                                                                                    | 4 weeks                                                                                                                                                                                                                                              | ...                                                                                                                                                                                                                             | In association with a urinary tract infection, her plasma LTM level rose briefly to 1.64 mEq/L. Treatment with procyclidine 10 mg 3x/day was started and her symptoms subsided after 6 days. Further, thioridazine 50 mg 2x/day                                                | 2 days after urinary tract infection, she had severe choreoathetoid movements, AKT, orofacial DKN (bruxism), and posturing                                                     | Cranial CT scan and EEG were normal        |
| Zorumski CF         | ...                                    | 1200 mg/day                        | 1.2 mEq/L       | 9 days                                                                                                 | 3 months                                                                                                                                                                                                                                             | Her depressive symptoms recurred after her discharge and were treated with trazodone 150 mg/day. She then became euthymic and had significant improvement by 6 weeks; choreiform movements disappeared by 3 months of follow-up | Because of poor affective disorder, she was given a trial of carbamazepine 200 mg. History of ATX and confusion, in 2 previous trials with LTM, which cleared over several days after discontinuation of LTM. Other medications: Amitriptyline 75 mg/day, haloperidol 2 mg/day | Confusion, dysarthria, confusion, were normal and marked choreoathetoid movements of her extremities, vomiting. Neurologic consultation revealed mild PKN features             | Cranial CT scan and EEG were normal        |
| Coffey CE           | Parkinson disease and on-off phenomena | ...                                | 0.78 mEq/L      | Discontinued after 3 weeks                                                                             | ...                                                                                                                                                                                                                                                  | ...                                                                                                                                                                                                                             | ...                                                                                                                                                                                                                                                                            | Choreoathetosis, hemiballismus, DKN                                                                                                                                            | ...                                        |

Contd...



**Supplemental Table 2: Contd...**

| Main author | Comorbidities besides LTM indication                                                                                                     | LTM dose (mg) | LTM levels | Time from LTM start to symptoms | Time from management to recovery | Follow-up                                                                                                                           | Important CH and CM                                                                                                                                                                                                                                                                        | Neurological symptoms and clinical examination                                                                                                                                                               | Neuroimaging - CT scan, brain MRI, and EEG |
|-------------|------------------------------------------------------------------------------------------------------------------------------------------|---------------|------------|---------------------------------|----------------------------------|-------------------------------------------------------------------------------------------------------------------------------------|--------------------------------------------------------------------------------------------------------------------------------------------------------------------------------------------------------------------------------------------------------------------------------------------|--------------------------------------------------------------------------------------------------------------------------------------------------------------------------------------------------------------|--------------------------------------------|
| Perényi A   | Parkinson disease and on-off phenomena                                                                                                   | ...           | 0.85 mEq/L | 4 weeks                         | ...                              | ...                                                                                                                                 | On initiation of LTM carbonate, he showed a 75% reduction in akinesia. Other med levodopa/carbidopa 10/100 mg 7x/day, bromocriptine 2.5 mg 8x/day. Reduction of levodopa/carbidopa (10/100 mg q.i.d.) and bromocriptine (25 mg q.i.d.) improved DKN. LTM was continued at the same dosage  | Choreoathetosis of all extremities, hemiballismus, orofacial DKN, shoulder/neck DTN. The involuntary movements were associated with psychomotor agitation, but no confusion, dysarthria, or cerebellar signs | ...                                        |
| Campbell WG | Episodic alcohol abuse during manic phases of his illness. Haloperidol. Mild hypertension, which was treated ith propranolol, 100 mg/day | 1200 mg/day   | 3.0 mEq/L  | 10 years                        | ...                              | After 3 years, the patient was well                                                                                                 | LTM therapy resulted in 62% reduction in akinesia. Other medications: Levodopa/carbidopa 25/250 mg 5x/day, bromocriptine 2.5 mg 10x/day. Reduction of levodopa/carbidopa 25/250 mg q.i.d. and bromocriptine 2.5 mg 8x/day managed the choreoathetosis and hemiballismus; LTM was continued | Choreoathetosis, hemiballismus                                                                                                                                                                               | ...                                        |
|             | Parkinson disease and on-off phenomena                                                                                                   | ...           | 0.79 mEq/L | 22 weeks                        | ...                              | ...                                                                                                                                 | LTM therapy resulted in 50% reduction in akinesia. LTM was discontinued and the dosage of levodopa/carbidopa tapered (25/100 mg q.i.d.), and the hallucinations and dyskinesia were resolved                                                                                               | Insomnia, visual hallucinations, upper-extremity choreoathetosis, dystonic posturing of the shoulders                                                                                                        | ...                                        |
|             | Parkinson disease and on-off phenomena                                                                                                   | ...           | 0.8 mEq/L  | 28 weeks                        | ...                              | ...                                                                                                                                 | LTM therapy resulted in 80% reduction in akinesia. LTM was tapered and eventually discontinued, levodopa/carbidopa dosage reduced to 25/250 mg q.i.d., with resolution of dyskinesias and hallucinations                                                                                   | Motor restlessness, insomnia, visual hallucination, orofacial dyskinesias                                                                                                                                    | ...                                        |
|             | ...                                                                                                                                      | ...           | ...        | ...                             | ...                              | ...                                                                                                                                 | TD in patients receiving LTM maintenance therapy                                                                                                                                                                                                                                           | ...                                                                                                                                                                                                          | ...                                        |
|             | ...                                                                                                                                      | ...           | ...        | ...                             | ...                              | After his death, a small focal area of neuronal loss and gliosis was noted in the depth of the horizontal sulcus of the cerebellum. | ...                                                                                                                                                                                                                                                                                        | ...                                                                                                                                                                                                          | ...                                        |

Contd...

**Supplemental Table 2: Contd...**

| Main author     | Comorbidities besides LTM indication                       | LTM dose (mg) | LTM levels    | Time from LTM start to symptoms                                                | Time from management to recovery | Follow-up                                                                                                                                                                                                                                                                  | Important CH and CM                                                                                                                                                                                                                                                                                  | Neurological symptoms and clinical examination                                                                                                                                       | Neuroimaging - CT scan, brain MRI, and EEG |
|-----------------|------------------------------------------------------------|---------------|---------------|--------------------------------------------------------------------------------|----------------------------------|----------------------------------------------------------------------------------------------------------------------------------------------------------------------------------------------------------------------------------------------------------------------------|------------------------------------------------------------------------------------------------------------------------------------------------------------------------------------------------------------------------------------------------------------------------------------------------------|--------------------------------------------------------------------------------------------------------------------------------------------------------------------------------------|--------------------------------------------|
| Walevski A      | Rheumatic arthritis (indomethacin 150 mg/day)              | 900 mg/day    | 0.9-2.5 mEq/L | 14 days                                                                        | 72 h                             | In addition, neuronal loss and gliosis were noted bilaterally in the HI segment of the hippocampus, and multifocal gliosis was noted in the thalamus. These lesions were compatible with remote ischemic-hypoxic episodes ...                                              | Suicide attempt with LTM and haloperidol. Benztropine mesylate, 4 mg                                                                                                                                                                                                                                 | ...<br>Choreoathetosis movements, dysarthria, random jerky movements, and writhing movements on the upper part of the body. Pressure of speech, flight of ideas with euphoric affect | ...                                        |
|                 | Partial thyroidectomies for goiter at the age of 35 and 40 | 1200 mg/day   | 1.4 mEq/L     | 3 days (9 treatment)                                                           | of 10 days                       | ...                                                                                                                                                                                                                                                                        | Haloperidol 15 mg/day was first used and then stopped because it caused severe TD after 6 days. LTM was then introduced                                                                                                                                                                              | EEG was normal and showed symmetrical irregular waves in the 8-11 Hz range                                                                                                           |                                            |
| Heggerty JJ Jr. | Neuroleptic malignant syndrome                             | 900 mg/day    | 0.6 mEq/L     | Patient had TD for 3 years. About 1 month before admission, LTM was introduced | ...                              | DKN continued at the same level of severity as had been seen on admission and was unaffected by a trial of lecitihin and later increases in the bromocriptine 27.5 mg/day, 3 months after the onset, he was successfully weaned from bromocriptine and was discharged home | He had taken neuroleptic medication, including thioridazine, oral and depot fluphenazine, and trifluoperazine continuously for 7 years. He was treated with diazepam 30 mg/day together with LTM. Reserpine was begun at 0.25 mg/day and was slowly increased over a 2-week interval to 1.25 mg/day. | TD, choreoathetoid movement, involving all four extremities, spasms of his neck and back muscles, twisting movements of his neck and trunk, grimacing, and occasional grunting.      | EEG, CT scan, and ceruloplasm were normal  |

Contd...

**Supplemental Table 2: Contd...**

| Main author | Comorbidities besides LTM indication | LTM dose (mg)   | LTM levels | Time from LTM start to symptoms | Time from management to recovery | Follow-up | Important CH and CM                                                                                                                                                                                                                                                                                                                                                                                                                                                                                                                                                                                                                                                                                                                                                                                                                                                                                                                                                                                                                                                                                                   | Neurological symptoms and clinical examination                                                                                                                          | Neuroimaging - CT scan, brain MRI, and EEG |
|-------------|--------------------------------------|-----------------|------------|---------------------------------|----------------------------------|-----------|-----------------------------------------------------------------------------------------------------------------------------------------------------------------------------------------------------------------------------------------------------------------------------------------------------------------------------------------------------------------------------------------------------------------------------------------------------------------------------------------------------------------------------------------------------------------------------------------------------------------------------------------------------------------------------------------------------------------------------------------------------------------------------------------------------------------------------------------------------------------------------------------------------------------------------------------------------------------------------------------------------------------------------------------------------------------------------------------------------------------------|-------------------------------------------------------------------------------------------------------------------------------------------------------------------------|--------------------------------------------|
| Nagaraja D  | ...                                  | 600-2100 mg/day | 1.1 mEq/L  | 36 months                       | ...                              | ...       | Initially, he appeared to benefit, exhibiting a relative decrease in truncal movements and having improved sleep. However, at doses of 1-1.25 mg of reserpine, his movements became more pronounced, and he developed transient blood pressure elevations to 170/110 mmHg, intermittent diaphoresis, tachycardia, and pallor. LTM and reserpine were discontinued; thioridazine 100 mg and haloperidol over 5 mg were given. Following each dose, he fell asleep and became free of movements for several hours. Within 4 h after receiving haloperidol, he became extremely rigid. Unexplained temperature fluctuation, diaphoresis, and leukocytosis persisted intermittently for 7 weeks and seemed to worsen whenever bromocriptine doses were withheld. DKN movements continued at the same level of severity had been seen on admission and were unaffected by a trial of lecithin and later increases in the bromocriptine dose to 27.5 mg/day. The subsequent course was complicated by the development of acute renal failure secondary to rhabdomyolysis (CPK >99 999 U), which required renal hemodialysis | The patient developed intermittent stidor, dysphagia, and auditory hallucinations 5 days after the discontinuation of reserpine and 3 days after discontinuation of LTM | Cranial CT scan showed cerebellar atrophy  |
|             | ...                                  | 600-2100 mg/day | 3.0 mEq/L  | 6 months                        | ...                              | ...       | Precipitating factor, probably were fever and chlorpromazine. Sequelae: cerebellar, pyramidal, DKN, and neuropathy                                                                                                                                                                                                                                                                                                                                                                                                                                                                                                                                                                                                                                                                                                                                                                                                                                                                                                                                                                                                    | Ataxia, confusion, tremor, cerebellar, pyramidal, DKN, and neuropathy                                                                                                   | ...                                        |
|             | ...                                  | 1200 mg/day     | 0.7 mEq/L  | 175 months                      | ...                              | ...       | Precipitating factors: Fever, chlorpromazine, dehydration; Sequelae: cerebellar, pyramidal, DKN                                                                                                                                                                                                                                                                                                                                                                                                                                                                                                                                                                                                                                                                                                                                                                                                                                                                                                                                                                                                                       | Coma, cerebellar, pyramidal, DKN                                                                                                                                        | ...                                        |
|             | ...                                  |                 |            |                                 |                                  |           | Precipitating factors: Chlorpromazine, butyrophenone. Sequelae: Cerebellar, pyramidal, neuropathy, DKN                                                                                                                                                                                                                                                                                                                                                                                                                                                                                                                                                                                                                                                                                                                                                                                                                                                                                                                                                                                                                | Cerebellar ATX, pyramidal, neuropathy, DKN                                                                                                                              | ...                                        |

Contd...

**Supplemental Table 2: Contd...**

| Main author  | Comorbidities besides LTM indication | LTM dose (mg)                                                   | LTM levels      | Time from LTM start to symptoms  | Time from management to recovery      | Follow-up | Important CH and CM                                                                                                                                                                                                                                                                                                                                                                                                                                                                                                                                     | Neurological symptoms and clinical examination                                                                                                                                                                                                                                                                                                      | Neuroimaging - CT scan, brain MRI, and EEG |
|--------------|--------------------------------------|-----------------------------------------------------------------|-----------------|----------------------------------|---------------------------------------|-----------|---------------------------------------------------------------------------------------------------------------------------------------------------------------------------------------------------------------------------------------------------------------------------------------------------------------------------------------------------------------------------------------------------------------------------------------------------------------------------------------------------------------------------------------------------------|-----------------------------------------------------------------------------------------------------------------------------------------------------------------------------------------------------------------------------------------------------------------------------------------------------------------------------------------------------|--------------------------------------------|
| Nasrallah HA | ...                                  | 590 mg/day (mean)                                               | ...             | ...                              | ...                                   | ...       | ...                                                                                                                                                                                                                                                                                                                                                                                                                                                                                                                                                     | Of 46 manic patients using LTM and other neuroleptics such as haloperidol, fluphenazine, trifluoperazine, 12 developed a DTN reaction                                                                                                                                                                                                               | ...                                        |
| Dinan TG     | ...                                  | ...                                                             | ...             | ...                              | ...                                   | ...       | ...                                                                                                                                                                                                                                                                                                                                                                                                                                                                                                                                                     | Of 40 psychiatric individuals, 9 developed DKN. The researchers observed that patients with and without TD did not differ in terms of duration of affective illness or exposure to neuroleptics, but those patients with tardive dyskinesia had significantly more psychiatric admissions and were on LTM for significantly greater lengths of time | ...                                        |
| Helmut D     | ...                                  | 600 mg/day - 19 days after they changed to 900 mg 3 times a day | 1.07-1.10 mEq/L | 4 days after verapamil was added | 3-4 days after discontinued verapamil | ...       | Verapamil (120 mg 3 times/day) was added together with LTM to treat mania                                                                                                                                                                                                                                                                                                                                                                                                                                                                               | Chorea/athetosis. He had mild voluntary tongue and mandibular movements which were similar to TD by haloperidol                                                                                                                                                                                                                                     | ...                                        |
| Matis PP     | ...                                  | 500 mg/day - later add more 250 mg                              | 2.0 mEq/L       | 2 days                           | 3 days (not clear)                    | ...       | Hypercalcaemia and hyperamyloasemia. For years, her maintenance therapy had been phenelzine 30 mg 3x/day and LTM 500 mg 1x/day. Several days before hospital admission, she had developed anorexia and become withdrawn. Believing that these symptoms were the prodroma of an impending DPS, her family practitioner increased the LTM to 250 mg in the morning and 500 mg at bedtime. In 2 days before her admission, she became increasingly confused and disorientated, complained of thirst, and eventually became bedbound with "muscle twitches" | On admission, she was restless, markedly confused, and disorientated in time, place, and person. She was able to obey simple commands but was dysarthric.                                                                                                                                                                                           | ...                                        |

**Supplemental Table 2: Contd...**

| Main author | Comorbidities besides LTM indication | LTM dose (mg) | LTM levels | Time from LTM start to symptoms | Time from management to recovery | Follow-up | Important CH and CM                                                                                                                                                                                                                                                                                                                                                                                                                                                                                                                                                                                                                                                                                                                                                                                                                                                                                                                                                                                        | Neurological symptoms and clinical examination                                                                                                                                                                                                                                                                                                                                                | Neuroimaging – CT scan, brain MRI, and EEG |
|-------------|--------------------------------------|---------------|------------|---------------------------------|----------------------------------|-----------|------------------------------------------------------------------------------------------------------------------------------------------------------------------------------------------------------------------------------------------------------------------------------------------------------------------------------------------------------------------------------------------------------------------------------------------------------------------------------------------------------------------------------------------------------------------------------------------------------------------------------------------------------------------------------------------------------------------------------------------------------------------------------------------------------------------------------------------------------------------------------------------------------------------------------------------------------------------------------------------------------------|-----------------------------------------------------------------------------------------------------------------------------------------------------------------------------------------------------------------------------------------------------------------------------------------------------------------------------------------------------------------------------------------------|--------------------------------------------|
| Reed SM     | ...                                  | ...           | 0.85 mEq/L | 8 days                          | 1 week                           | ...       | To "calm himself down," the patient took increasing amounts of LTM and triazolam. About 5 days before evaluation, a nonpruritic rash appeared on his forearms, lower abdomen, thighs, and dorsum of his hands. Three days later, he became confused and disoriented, and a tremor began, which gradually increased in intensity. He then developed purposeless movements of his arms, legs, and head; these became so severe that he was unable to eat, drink, or dress himself. The patient had been treated with LTM for the past 12 years, and, before LTM, ECT, and antipsychotics. His history was remarkable for an episode of LTM toxicity when he took excessive amounts of medication during a manic phase. His LTM level at that time was 1.92 mEq/L. LTM was discontinued and then restarted 1 year later. Since that time, the patient had done well on LTM, except for manic episodes usually associated with noncompliance. The patient reported a distant history of episodic alcohol abuse | On examination, she had an unsteady ataxic gait and could not cooperate in other tests of coordination. DTRs were symmetrically brisk with bilateral equivocal extensor plantar responses. There was no neck stiffness. In addition to restlessness, she had small purposeless movements in all four limbs. Spontaneous irritable choreiform movements of arms, legs, and trunk became marked | EEG was normal                             |

Contd...

## Supplemental Table 2: Contd...

| Main author | Comorbidities besides LTM indication | LTM dose (mg) | LTM levels    | Time from LTM start to symptoms | Time from management to recovery | Follow-up                                                                                                                                                                                                                                      | Important CH and CM                                                                                                                                                                                                                                                                                                                                                                                                                                                                                                                                               | Neurological symptoms and clinical examination                                                                                                                                                    | Neuroimaging - CT scan, brain MRI, and EEG                                    |
|-------------|--------------------------------------|---------------|---------------|---------------------------------|----------------------------------|------------------------------------------------------------------------------------------------------------------------------------------------------------------------------------------------------------------------------------------------|-------------------------------------------------------------------------------------------------------------------------------------------------------------------------------------------------------------------------------------------------------------------------------------------------------------------------------------------------------------------------------------------------------------------------------------------------------------------------------------------------------------------------------------------------------------------|---------------------------------------------------------------------------------------------------------------------------------------------------------------------------------------------------|-------------------------------------------------------------------------------|
| ...         | ...                                  | ...           | 2.18 mEq/L    | 48 h                            | 1 week                           | ...                                                                                                                                                                                                                                            | Thioridazine and chlorpromazine were his only known medications at the time of admission. Additional information obtained from another hospital shortly after admission indicated that the patient had been taking LTM and had a 20-year history of BD                                                                                                                                                                                                                                                                                                            | At admission, physical examination was significant for garbled speech, hyperreflexia, MCL, asterixis, perseveration, poor stereognosis, and graphesthesia. Choreoathetosis                        | Head CT showed diffuse atrophy, and EEC showed diffuse and paroxysmal slowing |
| Sternbach H | ...                                  | 1200 mg/day   | 0.9-1.0 mEq/L | ...                             | ...                              | 1 month later, she reported a recurrence of chewing movements                                                                                                                                                                                  | LTM prophylaxis since 1971. In addition to LTM, the patient was taken l-thyroxin 0.1 mg/day for 7 years (due to LTM-induced hypothyroidism) and conjugated estrogens 0.3 mg/day for 15 years                                                                                                                                                                                                                                                                                                                                                                      | She went to consultation due complaints of 2-year history of involuntary chewing movements. Vermiform movement of tongue, chewing movements including lips, jaw, and tongue, slight acting tremor | ...                                                                           |
| Scappa S    | ...                                  | 1200 mg/day   | ...           | ...                             | ...                              | He developed a manic episode within the next 2 months and both the TD and PKN vanished completely. From the 4-6 episodes that occurred annually, it was noted that his TD disappeared during mania and worsened a week before the onset of DPS | He had been taking methotrimeprazine 300 mg and LTM 1200 mg/day. Profound DPS was noted during the examination. Trimipramine 200 mg was started. In addition, he displayed shuffling gait, drooling, rigidity, and choreoathetotic bucco-oral, truncal, and extremity movements accompanied by jerky respiration. He developed a manic episode within the next 2 months, and both the TD and PKN vanished completely. From the 4-6 episodes that occurred annually, it was noted that his TD disappeared during mania and worsened a week before the onset of DPS | Shuffling gait, drooling, rigidity, and choreoathetotic bucco-oral DKN, truncal, and extremity movements accompanied by jerky respiration                                                         | ...                                                                           |

Contd...

**Supplemental Table 2: Contd...**

| Main author | Comorbidities besides LTM indication | LTM dose (mg)   | LTM levels    | Time from LTM start to symptoms | Time from management to recovery | Follow-up                                                                                    | Important CH and CM                                                                                                                                                                                                                                                                                                                                                                                                                                                                                                                                                                                                                                                                                                                                                                                                                                                                | Neurological symptoms and clinical examination                                                                                                                      | Neuroimaging - CT scan, brain MRI, and EEG |
|-------------|--------------------------------------|-----------------|---------------|---------------------------------|----------------------------------|----------------------------------------------------------------------------------------------|------------------------------------------------------------------------------------------------------------------------------------------------------------------------------------------------------------------------------------------------------------------------------------------------------------------------------------------------------------------------------------------------------------------------------------------------------------------------------------------------------------------------------------------------------------------------------------------------------------------------------------------------------------------------------------------------------------------------------------------------------------------------------------------------------------------------------------------------------------------------------------|---------------------------------------------------------------------------------------------------------------------------------------------------------------------|--------------------------------------------|
|             | ...                                  | 900-1500 mg/day | ...           | ...                             | ...                              | In November 1991, she developed a manic episode during which all these movements disappeared | During the first decade of her illness, she intermittently took LTM (900-1500 mg/day) and haloperidol (10-40 mg/day). Mania almost always followed an episode of DPS. After the onset of her rapid cycling, she developed severe choreoathetotic and DTN movements which waxed and waned depending on whether she had suffered a manic or a DPS episode. 2 weeks later (February 20, 1989), she went to the emergency room of the hospital to be treated for a manic episode. No abnormal involuntary movements occurred once she was placed on haloperidol (2-5 mg/day). On January 10, 1990, she reported stiffness all over her body, shuffling gait, involuntary movements of the neck and shoulder, and inability to sit still. The examination revealed DPS, typical buccolingual movements, truncal DKN, neck and shoulder DTN, and occasional grunting and jerky breathing | Choreoathetotic and dystonic involuntary movements. Typical buccolingual movements, truncal DKN, neck and shoulder DTN, and occasional grunting and jerky breathing | ...                                        |
| Lazarus A   | Epilepsy                             | 900 mg/day      | 0.5-0.7 mEq/L | 5 years                         | ...                              | ...                                                                                          | The patient was treated with phenytoin (1981-1983) and thereafter with carbamazepine 400 mg/day. Both LTM and carbamazepine were stopped in 1992 after persistent movement disorder disappeared                                                                                                                                                                                                                                                                                                                                                                                                                                                                                                                                                                                                                                                                                    | Striking dystonic movements, truncal DTN, opisthotonic posturing, myoclonic jerks, blepharospasm, and irregular respirations                                        | Normal                                     |

Contd...

**Supplemental Table 2: Contd...**

| Main author  | Comorbidities besides LTM indication | LTM dose (mg) | LTM levels                | Time from LTM start to symptoms | Time from management to recovery | Follow-up                                                   | Important CH and CM                                                                                                                                                                                                                                                                                                                                                                                                                                                                                                                                                                                                                                                                                              | Neurological symptoms and clinical examination                                                                                                                                                                                                                                                             | Neuroimaging - CT scan, brain MRI, and EEG                                                                                                                                                                                                                                                                                                                                                                                                                                                                                                                                                       |
|--------------|--------------------------------------|---------------|---------------------------|---------------------------------|----------------------------------|-------------------------------------------------------------|------------------------------------------------------------------------------------------------------------------------------------------------------------------------------------------------------------------------------------------------------------------------------------------------------------------------------------------------------------------------------------------------------------------------------------------------------------------------------------------------------------------------------------------------------------------------------------------------------------------------------------------------------------------------------------------------------------------|------------------------------------------------------------------------------------------------------------------------------------------------------------------------------------------------------------------------------------------------------------------------------------------------------------|--------------------------------------------------------------------------------------------------------------------------------------------------------------------------------------------------------------------------------------------------------------------------------------------------------------------------------------------------------------------------------------------------------------------------------------------------------------------------------------------------------------------------------------------------------------------------------------------------|
| Trugman JM   | ...                                  | 1500 mg/day   | ...                       | ...                             | ...                              | ...                                                         | Examination in June 1986, while taking fluphenazine (80 mg/day) showed evidence of AKT. The patient was treated with fluphenazine (55 mg/day), benztropine (1 mg/day), LTM (1500 mg/day), and lorazepam (6 mg/day) for the next 6 months, during which time a severe movement disorder became apparent. Fluphenazine was tapered and replaced with thioridazine (500 mg/day). Drug-induced PKN, including bradykinesia, cogwheel rigidity, and intermittent left arm tremor, was noted at this time. Thioridazine was tapered (50 mg/day), but this was not tolerated due to worsening psychosis. Trihexyphenidyl (30 mg/day), in combination with reserpine (0.25 mg/day), was poorly tolerated and ineffective | Examination in November 1986 showed a gait disorder characterized by high steps, pelvic thrusting, and extension of the arms. Mild lip pursing and tongue movements and foot tapping were also noted. Tardive DTN                                                                                          | ...                                                                                                                                                                                                                                                                                                                                                                                                                                                                                                                                                                                              |
| Podskalny GD | Hypertension                         | 600 mg/day    | 2.2 mEq/L, then 1.7 mEq/L | 10 years                        | ...                              | 2 weeks after discharge, there was no sign of chorea or ATX | The patient had a history of BD and had been treated by a psychiatrist for 30 years. Her affective disorder was well controlled for 10 years with LTM 600 mg/day. A few weeks before her admission, the patient was seen by her primary care physician, who prescribed furosemide (40 mg/day) and potassium chloride (20 mEq) due to hypertension. She had not taken neuroleptics for >10 years. She had a slight metabolic acidosis with respiratory compensation                                                                                                                                                                                                                                               | The patient was lethargic and somewhat confused but would follow simple commands. Her speech was extremely dysarthric. The patient's muscle tone was normal with generalized weakness but no focal weakness. Slight hyperreflexia in the right upper extremity. Plantar responses were flexor bilaterally. | Normal cranial CT scan. Brain MRI revealed an old 1.5-mm left caudate head lacunar infarct. EEG was remarkable for slowing of the posterior dominant rhythm (6-7 Hz) and theta and delta slowing of the background activity, which supports a diagnosis of metabolic encephalopathy. There were abundant spike and sharp transient waves originating independently from both posterior quadrants. Trains of pseudoperiodic sharp transients briefly occurred in both parietal regions with a frequency of 0.5 cycles/s. A repeated EEG during the later part of the hospitalization was improved |

Contd...



**Supplemental Table 2: Contd...**

| Main author          | Comorbidities besides LTM indication | LTM dose (mg)             | LTM levels | Time from LTM start to symptoms | Time from management to recovery | Follow-up | Important CH and CM                                                                                                                                                                                                                                                                                                                                                                                                                 | Neurological symptoms and clinical examination                                                                                                                                                                                                                                                                                                                                                                                                        | Neuroimaging – CT scan, brain MRI, and EEG |
|----------------------|--------------------------------------|---------------------------|------------|---------------------------------|----------------------------------|-----------|-------------------------------------------------------------------------------------------------------------------------------------------------------------------------------------------------------------------------------------------------------------------------------------------------------------------------------------------------------------------------------------------------------------------------------------|-------------------------------------------------------------------------------------------------------------------------------------------------------------------------------------------------------------------------------------------------------------------------------------------------------------------------------------------------------------------------------------------------------------------------------------------------------|--------------------------------------------|
| Meyer-Lindenber<br>g | ...                                  | ...                       | 1.1 mEq/L  | ...                             | ...                              | ...       | In 1991, she developed a transient orofacial DKN for the first time during a depressive episode. In September 1994, she was readmitted because of ATX gait, slurred speech, and disorientation. LTM intoxication due to insufficient fluid intake was diagnosed, and the LTM was discontinued. The ATX and intention tremor rapidly subsided, but the chorea of the digits and the pronounced orofacial and abdominal DKN persisted | Involuntary movements developed. Her head, neck, trunk, and extremities were in almost constant motion. These movements had the appearance of being spontaneous, irregular, purposeless, writhing, twisting, flowing, and rocking in nature. Voluntary movement or sustained posture increased the severity of these movements, which were judged to be choreoathetosis. In addition, the patient had marked dysarthria and limb, trunk, and gait ATX | EEG was normal                             |
| Higes-Pascual F      | Hypertension                         | 1000 mg/day (400-200-400) | 2.07 mEq/L | 28 days                         | 48 h                             | ...       | In 1982, hypertension diagnosis and was in use of captopril 100 mg/day                                                                                                                                                                                                                                                                                                                                                              | Choreoathetosis of limbs and head                                                                                                                                                                                                                                                                                                                                                                                                                     | ...                                        |

Contd...

## Supplemental Table 2: Contd...

| Main author | Comorbidities besides LTM indication | LTM dose (mg) | LTM levels | Time from LTM start to symptoms                                                                                                            | Time from management to recovery                                                                                                                                                                                           | Follow-up                                                                                                                                                                                              | Important CH and CM                                                                                                                                                                                                                                                                                                                                                                                                                                                                                                                                                                                                                                                                                                                                                                                                                                             | Neurological symptoms and clinical examination                                                                                                                                                                                                                                                                                                                                                                                                                                                           | Neuroimaging - CT scan, brain MRI, and EEG                                                                                                                                                                                                                                                                                                                                                                                                                                                                  |
|-------------|--------------------------------------|---------------|------------|--------------------------------------------------------------------------------------------------------------------------------------------|----------------------------------------------------------------------------------------------------------------------------------------------------------------------------------------------------------------------------|--------------------------------------------------------------------------------------------------------------------------------------------------------------------------------------------------------|-----------------------------------------------------------------------------------------------------------------------------------------------------------------------------------------------------------------------------------------------------------------------------------------------------------------------------------------------------------------------------------------------------------------------------------------------------------------------------------------------------------------------------------------------------------------------------------------------------------------------------------------------------------------------------------------------------------------------------------------------------------------------------------------------------------------------------------------------------------------|----------------------------------------------------------------------------------------------------------------------------------------------------------------------------------------------------------------------------------------------------------------------------------------------------------------------------------------------------------------------------------------------------------------------------------------------------------------------------------------------------------|-------------------------------------------------------------------------------------------------------------------------------------------------------------------------------------------------------------------------------------------------------------------------------------------------------------------------------------------------------------------------------------------------------------------------------------------------------------------------------------------------------------|
| Normann C   | ...                                  | 1125 mg/day   | 0.92 mEq/L | 6 days. History of about 20 years of chronic LTM therapy. She had PKN 6 days after admission, before LTM was reintroduced                  | 6 days                                                                                                                                                                                                                     | Involuntary irregular choreoathetoid movements of the muscles of the upper limbs and the trunk together with perioral and finger movements were noted which were found to be persistent after 6 months | At the time of admission, she was receiving LTM (900 mg/day) with plasma levels between 0.6-0.8 mEq/L and amitriptyline (30 mg/day). The psychopathology was relevant for an elevated and expansive mood, psychomotor agitation, and aggressive outbursts. Her formal thinking was characterized by loosened associations, neologisms and rhyming. She expressed paranoid delusions and stated that she had not slept for several days. A diagnosis of a manic episode with psychotic symptoms was established and therapy with valproate (1200 mg/day) and haloperidol (24 mg/day) was started. During hospitalization she also used biperiden, perazine, and clonazepam. On day 56 <sup>th</sup> , all drugs were stopped. The patient showed a rapid and dramatic recovery. Within 6 days, she was completely orientated with no further thought disturbance | Neuroleptic-induced muscular rigidity and akinesia. In a progressive manner, she became disoriented in time, place, and person and was no longer able to perform the activities of daily living. Severe delirium characterized by disorientation, restlessness, fear and optical hallucination. Mild pallihypesthesia of both feet. Rigor of all extremities. Involuntary irregular choreoathetoid movements of the muscles of the upper limbs and the trunk together with perioral and finger movements | Normal cranial CT scan and brain MRI. The baseline EEG on the 8 <sup>th</sup> day was normal except for a mild diffuse slowing. The EEG on the 30 <sup>th</sup> day showed a slowing of the occipital background activity and a marked diffuse slowing. On day 56 <sup>th</sup> , the occipital background activity was 6 Hz while the diffuse slowing was almost continuously present. On day 63 <sup>th</sup> , the EEG improved gradually until a normal recording was achieved on day 100 <sup>th</sup> |
| Gerding LB  | ...                                  | 900 mg/day    | ...        | 24 years (maybe 24 years. Symptoms started 6 years before report, considering that he was the 30 previous years in LTM therapy. Not clear) | After 2 weeks on clonazepam, the patient displayed only mild residual TD in his face and fingers. He continued to have mild TD for 4 months. He then missed a routine follow-up appointment and stopped taking clonazepam. | ...                                                                                                                                                                                                    | Consistent use of various neuroleptics including thioridazine (50-500 mg/day), chlorpromazine (200-600 mg/day), haloperidol (2-10 mg/day), and benzotropine (1-2 mg/day). At age 75 years, he developed mild TD. At the onset of TD, the haloperidol dose was reduced from 5 to 1 mg/day and then discontinued, with initial worsening of TD and then mild residual TD that the patient tolerated. Other medications used: LTM, risperidone, buspirone, quetiapine, and clonazepam                                                                                                                                                                                                                                                                                                                                                                              | Athetoid movements of the lips, tongue, and fingers. He had marked tongue movements causing difficulty speaking, and he became anxious about being in public. His AIMS score was in the severe range, with severe DKN and DTN oral and facial movements and moderate finger athetoid movements                                                                                                                                                                                                           | ...                                                                                                                                                                                                                                                                                                                                                                                                                                                                                                         |

Contd...

**Supplemental Table 2: Contd...**

| Main author | Comorbidities besides LTM indication | LTM dose (mg) | LTM levels | Time from LTM start to symptoms | Time from management to recovery                                                                                                                                                                                                                                                                                                                                                     | Follow-up                                                                                                                                                                                                                                                                                                                                                                                                                                                                                                                                                                                                                                                                                                                           | Important CH and CM                                                                                                                                                                                                                                                           | Neurological symptoms and clinical examination | Neuroimaging - CT scan, brain MRI, and EEG |
|-------------|--------------------------------------|---------------|------------|---------------------------------|--------------------------------------------------------------------------------------------------------------------------------------------------------------------------------------------------------------------------------------------------------------------------------------------------------------------------------------------------------------------------------------|-------------------------------------------------------------------------------------------------------------------------------------------------------------------------------------------------------------------------------------------------------------------------------------------------------------------------------------------------------------------------------------------------------------------------------------------------------------------------------------------------------------------------------------------------------------------------------------------------------------------------------------------------------------------------------------------------------------------------------------|-------------------------------------------------------------------------------------------------------------------------------------------------------------------------------------------------------------------------------------------------------------------------------|------------------------------------------------|--------------------------------------------|
| McGavin CL  | Borderline personality disorder      | 300 mg/day    | ...        | ...                             | <p>Over 2 weeks, his TD worsened and hypomania returned. His AIMS score returned to the severe range. He was restarted on clonazepam, 0.5 mg bid, with a rapid improvement of TD and reduction of hypomania. The athetoid movements resolved nearly completely over 1 week, and he has continued to be well for 4 months</p> <p>3 weeks after resuming levetiracetam 1000 mg/day</p> | <p>5 months earlier, adjunctive antidepressant treatment with LTM (300 mg/day) was discontinued after 10 years because of improvement in DPS. DKN began 4 weeks later and progressed to subjective maximum within 1 month. A 1-month trial of haloperidol (5 mg per day) 4 years earlier produced identical movements that resolved completely upon discontinuation of haloperidol. Current medications were fluoxetine (20 mg/day) and sustained release bupropion (300 mg/day). A diagnosis of TD was made and treatment with clonidine (0.3 mg per day) produced a decrease in symptoms. Levetiracetam (500 mg per day) was started. Examination 3 weeks later demonstrated only rare orobuccal movements. AIMS score was 3.</p> | <p>Abnormal movements of the tongue, mouth, and hands. Frequent orobuccolingual dyskinesias, which produced a mild dysarthria, were present on examination. Intermittent choreic movements of the trunk and choreoathetoid movements of the forearms and hands were seen.</p> | ...                                            |                                            |
|             |                                      |               |            |                                 | <p>Clonazepam led to a profound improvement of his TD. After 2 weeks on clonazepam, the patient displayed only mild residual TD in his face and fingers</p>                                                                                                                                                                                                                          |                                                                                                                                                                                                                                                                                                                                                                                                                                                                                                                                                                                                                                                                                                                                     |                                                                                                                                                                                                                                                                               |                                                |                                            |

Contd...

**Supplemental Table 2: Contd...**

| Main author | Comorbidities besides LTM indication | LTM dose (mg) | LTM levels | Time from LTM start to symptoms | Time from management to recovery | Follow-up | Important CH and CM                                                                                                                                                                                                                                                                                                                                                                                                                                                                                               | Neurological symptoms and clinical examination                                                                                                                                                                                                                                                                                                                                                                                                                         | Neuroimaging - CT scan, brain MRI, and EEG |
|-------------|--------------------------------------|---------------|------------|---------------------------------|----------------------------------|-----------|-------------------------------------------------------------------------------------------------------------------------------------------------------------------------------------------------------------------------------------------------------------------------------------------------------------------------------------------------------------------------------------------------------------------------------------------------------------------------------------------------------------------|------------------------------------------------------------------------------------------------------------------------------------------------------------------------------------------------------------------------------------------------------------------------------------------------------------------------------------------------------------------------------------------------------------------------------------------------------------------------|--------------------------------------------|
| Stemper B   | ...                                  | ...           | 2.43 mEq/L | 1.5 years                       | 5 days                           | ...       | <p>Because of the marked improvement, the patient discontinued levetiracetam and clonidine. Dyskinesias returned to their pretreatment level within 4 weeks. Levetiracetam was restarted and increased to 1000 mg per day. 3 weeks later, no dyskinesias were present on examination</p>                                                                                                                                                                                                                          | <p>Tremor, rigidity, and bradykinesia were absent. Gait was of normal base and station. Stress gait maneuver exacerbated all of the dyskinesias and produced dystonic posturing of the right hand. Signs of psychosis and cognitive impairment were absent. AIMS score was 35</p>                                                                                                                                                                                      | Normal cranial CT scan                     |
|             |                                      |               |            |                                 |                                  |           | <p>Referring physician suspected transient ischemic attack. The patient was being treated for hypertension with beta-blocker, an acetyl cholinesterase inhibitor, and a thiazide diuretic. About 1 h after admission, the patient's symptoms had worsened. Considering the patient's advanced age and the apparently impaired kidney function, she underwent hemodialysis. After hemodialysis, the LTM level decreased to 0.2 mEq/L, the patient became more alert and the choreoathetotic movements subsided</p> | <p>Dysarthric speech, seemed somewhat confused. She had difficulties answering questions regarding the date, time, location, her date of birth, and her symptoms. She was not able to walk. There were no involuntary movements at the time of admission. After 1 h, unable to communicate and was not following even simple commands. In addition, she started to show spontaneous twisting, choreoathetotic movements of both hands and arms. Severe gait ataxia</p> |                                            |

Contd...

**Supplemental Table 2: Contd...**

| Main author  | Comorbidities besides LTM indication                          | LTM dose (mg) | LTM levels | Time from LTM start to symptoms          | Time from management to recovery                                                                                | Follow-up                                                                                  | Important CH and CM                                                                                                                                                                                                                                                                                                                                                                                                                                                                                                                                                                   | Neurological symptoms and clinical examination                                                                                                                                                                                                                                                        | Neuroimaging - CT scan, brain MRI, and EEG          |
|--------------|---------------------------------------------------------------|---------------|------------|------------------------------------------|-----------------------------------------------------------------------------------------------------------------|--------------------------------------------------------------------------------------------|---------------------------------------------------------------------------------------------------------------------------------------------------------------------------------------------------------------------------------------------------------------------------------------------------------------------------------------------------------------------------------------------------------------------------------------------------------------------------------------------------------------------------------------------------------------------------------------|-------------------------------------------------------------------------------------------------------------------------------------------------------------------------------------------------------------------------------------------------------------------------------------------------------|-----------------------------------------------------|
| Wada K       | Hypertension, chronic hepatitis type C, and diabetes mellitus | 1200 mg/day   | 3.52 mEq/L | ...                                      | 23 days                                                                                                         | ...                                                                                        | ...                                                                                                                                                                                                                                                                                                                                                                                                                                                                                                                                                                                   | Consciousness disturbance and choreoathetosis were observed in her face and upper and lower extremities                                                                                                                                                                                               | EEG showed bilateral symmetrical slow-wave activity |
| Bender S     | ...                                                           | ...           | ...        | ...                                      | ...                                                                                                             | ...                                                                                        | ...                                                                                                                                                                                                                                                                                                                                                                                                                                                                                                                                                                                   | Study that assessed the safety and efficacy of combined clozapine-LTM pharmacotherapy. Of 44 patients, 3 developed orofacial DKN                                                                                                                                                                      | ...                                                 |
| Mendhekar DN | ...                                                           | 900 mg/day    | ...        | 1 year after stopping LTM and dothiepine | He showed good improvement within 2 weeks of trial, and at the end of 4 weeks, his score went down to 1 on AIMS | He was followed up for 4 months, and there was no recurrence of DKN movements of the mouth | His past history revealed that he had a first episode of severe major DPS about 4 years back, which was treated with LTM (900 mg/day), dothiepin (75 mg/day), and 6 ECT without any complications (including movement disorders). The patient continued this regimen for 4 months, and later on stopped it, as he was symptom-free. 1 year after the stoppage of these drugs, he started exhibiting stereotyped abnormal movements of the mouth in the form of puckering of lips, which increased in intensity during emotional situations and disappeared completely while sleeping. | Stereotyped abnormal movements of the mouth in the form of puckering of lips. Further assessment revealed continuous repetitive, stereotyped puckering movements of the lips. He would control his movements but only for 1-2 min. He scored 7 on the AIMS, which was moderate to severe in intensity | ...                                                 |

Contd...

## Supplemental Table 2: Contd...

| Main author  | Comorbidities besides LTM indication | LTM dose (mg) | LTM levels | Time from LTM start to symptoms                                                                         | Time from management to recovery                                                          | Follow-up | Important CH and CM                                                                                                                                                                                                                                                                                                                                                                                                                                                                                                                                                                                                                                                      | Neurological symptoms and clinical examination                                                                                                                                                                                                                                                                                                                                                                                                        | Neuroimaging - CT scan, brain MRI, and EEG                                                                                                               |
|--------------|--------------------------------------|---------------|------------|---------------------------------------------------------------------------------------------------------|-------------------------------------------------------------------------------------------|-----------|--------------------------------------------------------------------------------------------------------------------------------------------------------------------------------------------------------------------------------------------------------------------------------------------------------------------------------------------------------------------------------------------------------------------------------------------------------------------------------------------------------------------------------------------------------------------------------------------------------------------------------------------------------------------------|-------------------------------------------------------------------------------------------------------------------------------------------------------------------------------------------------------------------------------------------------------------------------------------------------------------------------------------------------------------------------------------------------------------------------------------------------------|----------------------------------------------------------------------------------------------------------------------------------------------------------|
| Mendhekar DN | ...                                  | 800 mg/day    | 0.7 mEq/L  | 1 month (2 weeks +2 weeks +3 days). However, it is not clear if the patient was using LTM when admitted | All her DKN movements disappeared within 5 min of IV administration of 50 mg promethazine | ...       | Mania precipitating factor being malarial fever that was treated with tablet chloroquine for 4 days. 2 previous episodes. For the current episode, she was given LTM (800 mg/day); 2 weeks later, risperidone (2 mg/day) was added. The risperidone was subsequently increased (5 mg/day) over 2 weeks. Her case was diagnosed as rabbit syndrome, and both the drugs were stopped. She scored 9 on the AIMS. All her DKN movements disappeared within 5 min of IV administration of promethazine (50 mg). Subsequently, she was given olanzapine (10 mg/day) and trihexyphenidyl (2 mg/day), along with the same dosage of LTM, without any recurrence of DKN movements | Abnormal perioral movements characterized by rapid, fine, rhythmic involuntary movement of her lips and jaw on a vertical axis, associated with AKT and occasional synchronous lingual movement. Diagnosed as rabbit syndrome                                                                                                                                                                                                                         | ...                                                                                                                                                      |
| Ozsoy S      | Pneumonia                            | 1200 mg/day   | 0.9 mEq/L  | 4 months (unclear)                                                                                      | ...                                                                                       | ...       | He had been taking LTM 1200 mg/day, lamotrigine 300 mg/day, and escitalopram 10 mg/day for 4 months, and he was in remission for 3 months. There was pneumonic infiltration in X-ray. Pneumonia was diagnosed. He was hospitalized to infectious diseases clinic and cured with antibiotics (levofloxacin 500 mg/day, sulbactam-ampicillin 6 g/day). His psychiatric medication was stopped                                                                                                                                                                                                                                                                              | In the psychiatric examination, he had dysarthria, normal orientation, and anxious affect. When neurologically examined, he had ataxia and dyskinesia. He was unable to stand, or walk at all, or to sit without support, had bilateral dysmetria and severe tremor in finger-to-nose and finger-to-finger tests, severe dysarthria, and bilateral horizontal nystagmus. The patient was diagnosed as cerebellar syndrome by the neurology department | Brain MRI and SPECT were normal. EEG showed epileptic activity in the areas of both temporal and left parietal although there was no epilepsy clinically |

Contd...

**Supplemental Table 2: Contd...**

| Main author           | Comorbidities besides LTM indication       | LTM dose (mg) | LTM levels    | Time from LTM start to symptoms | Time from management to recovery | Follow-up | Important Ch and CM                                                                                                                                                                                                                                                                                                                                                                                                                                                                                                                                                                                                                                                                                                                                                                                                                                                                                                                                                                                                                                                                                                                                                                                                                                                                                                                                                                                                                                                                                                                                                                                                                                                                                                                                                                                        | Neurological symptoms and clinical examination                                                                 | Neuroimaging - CT scan, brain MRI, and EEG                                                                                         |
|-----------------------|--------------------------------------------|---------------|---------------|---------------------------------|----------------------------------|-----------|------------------------------------------------------------------------------------------------------------------------------------------------------------------------------------------------------------------------------------------------------------------------------------------------------------------------------------------------------------------------------------------------------------------------------------------------------------------------------------------------------------------------------------------------------------------------------------------------------------------------------------------------------------------------------------------------------------------------------------------------------------------------------------------------------------------------------------------------------------------------------------------------------------------------------------------------------------------------------------------------------------------------------------------------------------------------------------------------------------------------------------------------------------------------------------------------------------------------------------------------------------------------------------------------------------------------------------------------------------------------------------------------------------------------------------------------------------------------------------------------------------------------------------------------------------------------------------------------------------------------------------------------------------------------------------------------------------------------------------------------------------------------------------------------------------|----------------------------------------------------------------------------------------------------------------|------------------------------------------------------------------------------------------------------------------------------------|
| Hunter CB<br>Lloyd RB | ...                                        | 400 mg/day    | 2.5 mEq/L     | 1 week                          | 5 days                           | No        | Treated over the past 6 years with aripiprazole (20 mg/day), VPA (1000 mg/day), clonazepam (1.5 mg/day), trazodone (100 mg), and LTM (300 mg/day). 1 week before her admission, her LTM dose had been increased (400 mg/day). Shortly after the increase, she became increasingly lethargic, disoriented, and withdrawn. This change was attributed to oversedation, so the clonazepam and trazodone were withheld. All psychotropic medications were withheld, and she was aggressively rehydrated. The nephrology service was consulted and determined that hemodialysis was not warranted at that time. 72 h later, her LTM level decreased (0.9 mEq/L); the hypnatremia resolved; and she was more alert; however, she developed involuntary choreoathetoid movements. Her psychotropic medications were restarted, with the exception of LTM, which was discontinued. On discharge, she had residual, intermittent tongue protrusions that interrupted her speech, with slight ocular rolling movements; her mental status had returned to baseline. He had failed mood-stabilizer monotherapy including LTM, carbamazepine, and VPA before. Between 2002 and 2006, he was in remission with oral haloperidol used as adjunct to carbamazepine as maintenance treatment. Later, he developed TD involving the oropharyngeal region despite receiving prior stable dosages of haloperidol and carbamazepine for 18 months. TD resolved after switching to quetiapine (400 mg/day) and Vitamin E (800 IU/day) with carbamazepine continued over the next 7 months. He remained in remission during that period. He was admitted to the psychiatric hospital for stabilization and later discharged with the regimen of LTM, VPA and 2-weekly risperidone (25 mg). He had no extrapyramidal side effects | The neurologic examination was significant for pinpoint pupils and a downward Babinski reflex. Choreoathetosis | Cranial CT scan showed confluent periventricular hypodensities compatible with moderate-to-severe nonspecific white matter disease |
| Chung AK              | Obesity, diabetes mellitus, hyperlipidemia | ...           | 0.6-0.9 mEq/L | ...                             | ...                              | ...       | He complained of involuntary, lateral oscillatory movements over the middle part of his neck                                                                                                                                                                                                                                                                                                                                                                                                                                                                                                                                                                                                                                                                                                                                                                                                                                                                                                                                                                                                                                                                                                                                                                                                                                                                                                                                                                                                                                                                                                                                                                                                                                                                                                               | ...                                                                                                            | ...                                                                                                                                |

## Supplemental Table 2: Contd...

| Main author   | Comorbidities besides LTM indication   | LTM dose (mg) | LTM levels | Time from LTM start to symptoms                                                                                                                              | Time from management to recovery                                                                                                                                         | Follow-up | Important CH and CM                                                                                                                                                                                                                                                                                                                                                                                                                                                                                                                                                                                                                                                                                                                                                                                                                                                                                                                                                                                                                                                                                                                                                                            | Neurological symptoms and clinical examination                                                                                                                                                                                                                       | Neuroimaging - CT scan, brain MRI, and EEG            |
|---------------|----------------------------------------|---------------|------------|--------------------------------------------------------------------------------------------------------------------------------------------------------------|--------------------------------------------------------------------------------------------------------------------------------------------------------------------------|-----------|------------------------------------------------------------------------------------------------------------------------------------------------------------------------------------------------------------------------------------------------------------------------------------------------------------------------------------------------------------------------------------------------------------------------------------------------------------------------------------------------------------------------------------------------------------------------------------------------------------------------------------------------------------------------------------------------------------------------------------------------------------------------------------------------------------------------------------------------------------------------------------------------------------------------------------------------------------------------------------------------------------------------------------------------------------------------------------------------------------------------------------------------------------------------------------------------|----------------------------------------------------------------------------------------------------------------------------------------------------------------------------------------------------------------------------------------------------------------------|-------------------------------------------------------|
| Arambawela MH | Type 2 diabetes mellitus, hypertension | 500 mg/day    | 2.57 mEq/L | 1 week                                                                                                                                                       | 5 days of commencement of steroids                                                                                                                                       | No        | LTM (1500 mg/day) was commenced along with a small dose of prednisolone. 1 week afterward, he presented with unsteadiness of gait, slurring of speech, agitation, altered level of consciousness, and reduced urine output. Before these symptoms, he had experienced vomiting and diarrhea. An initial working diagnosis was LTM toxicity with possible meningoencephalitis in the back ground of thyrotoxicosis. LTM was omitted, and the patient was hydrated and dialyzed. IV ceftriaxone and acyclovir for a possible meningoencephalitis was commenced. Carbimazole was continued. There was no neurological improvement following hemodialysis and normalization of LTM levels and renal functions. This prompted consideration of any alternative diagnosis such as Hashimoto's encephalopathy and oral prednisolone 60 mg/day was initiated. Thyroid autoantibodies inclusive of thyroglobulin antibodies and thyroid peroxidase antibodies were twice negative. He made a remarkable neurological improvement within 5 days of commencement of steroids and was discharged following 2 weeks of hospital stay. It was planned to tail off the steroids and titrate antithyroid drugs | Neurological examination revealed increased tone in all four limbs with exaggerated reflexes and bilateral extensor plantar responses. Choreiform movements involving face and upper limbs were noted. There was no neck stiffness, and he was moderately dehydrated | EEG showed nonspecific generalized delta activity     |
| Cobb A        | ...                                    | ...           | 2.2 mEq/L  | The patient came to the emergency room, after a 3-day history of word-finding difficulty, confusion, dysarthria, tremor, impaired short-term memory, and ATX | On discharge (hospital day 10 <sup>th</sup> ), the choreoathetosis had completely resolved, and she was back to her baseline level of cognitive and physical functioning | ...       | Relevant medical history included bipolar type I disorder treated with lithium for 34 years. On hospital day 2, the patient developed dramatic choreoathetosis - involuntary, irregular, nonrhythmic, high amplitude, dance-like writhing. Her movements were unremitting, requiring one-on-one nursing care to ensure her safety. Voluntary muscle control was limited. The patient did not report any discomfort with these movements. Despite normalization of her renal function and lithium level, her choreoathetosis continued. On discharge (hospital day 10), the choreoathetosis had completely resolved                                                                                                                                                                                                                                                                                                                                                                                                                                                                                                                                                                             | Tremor of the upper limbs and facial muscles and choreoathetosis. Physical examination showed a fine rapid tremor of the upper limbs and facial muscles. The neurological examination was notable for a positive Romberg sign, perseveration, and bradykinesia       | Head CT, ECG, and CXR performed in the ED were normal |

Contd...



**Supplemental Table 2: Contd...**

| Main author  | Comorbidities besides LTM indication | LTM dose (mg/day) | LTM levels | Time from LTM start to symptoms | Time from management to recovery                                                                                                                                                                            | Follow-up                                                                 | Important CH and CM                                                                                                                                                                                                                                                                                                                                                                                                                                                                                                                                                                                                                                                                                                                                                                                                                                                                                                                    | Neurological symptoms and clinical examination                                                                                                                                     | Neuroimaging - CT scan, brain MRI, and EEG                                                                                                                                         |
|--------------|--------------------------------------|-------------------|------------|---------------------------------|-------------------------------------------------------------------------------------------------------------------------------------------------------------------------------------------------------------|---------------------------------------------------------------------------|----------------------------------------------------------------------------------------------------------------------------------------------------------------------------------------------------------------------------------------------------------------------------------------------------------------------------------------------------------------------------------------------------------------------------------------------------------------------------------------------------------------------------------------------------------------------------------------------------------------------------------------------------------------------------------------------------------------------------------------------------------------------------------------------------------------------------------------------------------------------------------------------------------------------------------------|------------------------------------------------------------------------------------------------------------------------------------------------------------------------------------|------------------------------------------------------------------------------------------------------------------------------------------------------------------------------------|
| Vandewalle W | ...                                  | ...               | ...        | ...                             | ...                                                                                                                                                                                                         | ...                                                                       | Study that assessed the movement disorders caused by different antidepressants. They reported 2 individuals with DKN and more 2 individuals with TD                                                                                                                                                                                                                                                                                                                                                                                                                                                                                                                                                                                                                                                                                                                                                                                    | ...                                                                                                                                                                                | ...                                                                                                                                                                                |
| Amamou B     | ...                                  | 1500 (mg/day)     | ...        | ...                             | 5 weeks after starting clozapine                                                                                                                                                                            | Since April 2015, the patient showed no relapse neither in mood nor in TD | In 2001, the patient was initially treated with carbamazepine (600 mg/day) and haloperidol (40 mg/day) treating a manic episode; he developed an induced TD involving muscles spasm in the neck and nape, which completely resolved after stopping haloperidol for 3 weeks. The reintroduction of haloperidol (10 mg/day) was well tolerated in combination with LTM carbonate treating the second manic relapse. In 2007, during the 3 <sup>rd</sup> manic relapse, he was treated with olanzapine (30 mg/day) in combination with LTM with recurrence of the TD. The neurological examination and brain scan were in favor of iatrogenic origin. From 2008 to 2014, several antipsychotics (to treat tardive DTN) in combination with LTM were tried. The patient did not show any improvement and DKN became very troublesome, with TD assessment score of 70. In 2015, clozapine was started, with improvement of TD after 5 weeks | TD                                                                                                                                                                                 | ...                                                                                                                                                                                |
| Huang SS     | ...                                  | 900 mg/day        | 3.18 mEq/L | ...                             | 6 months later, she had total recovery of the involuntary movements of the face, mouth, extremities, and trunk. However, she still experienced the neurological sequelae of general weakness and dysarthria | No                                                                        | Had been taking the medications such as LTM (900 mg/day) and quetiapine (600 mg/day) for 6 months                                                                                                                                                                                                                                                                                                                                                                                                                                                                                                                                                                                                                                                                                                                                                                                                                                      | The patient developed involuntary movements such as biting and mouth chewing, and rapid, purposeless, irregular, and spontaneous choreic movements of her arms, wrists, and hands. | Brain MRI showed a symmetrical high signal intense lesion in the splenium of the corpus callosum on the three-directional diffusion image, which was consistent with axonal injury |

Contd...

**Supplemental Table 2: Contd...**

| Main author | Comorbidities besides LTM indication | LTM dose (mg) | LTM levels | Time from LTM start to symptoms | Time from management to recovery | Follow-up | Important CH and CM | Neurological symptoms and clinical examination                                                                                                                                                                                                                                                                                                                                                                                                                                                                                                                                                                                                                                                   | Neuroimaging - CT scan, brain MRI, and EEG |
|-------------|--------------------------------------|---------------|------------|---------------------------------|----------------------------------|-----------|---------------------|--------------------------------------------------------------------------------------------------------------------------------------------------------------------------------------------------------------------------------------------------------------------------------------------------------------------------------------------------------------------------------------------------------------------------------------------------------------------------------------------------------------------------------------------------------------------------------------------------------------------------------------------------------------------------------------------------|--------------------------------------------|
|             |                                      |               |            |                                 |                                  |           |                     | <p>Foot squirming and twisting of neck and shoulder were also noted.</p> <p>The involuntary movements subsided when sleeping. We restored quetiapine monotherapy for her BD. 1 month later, the delirium resolved, and she could reply with simple words.</p> <p>However, the patient still had ATX, dysarthria, and involuntary movement.</p> <p>Owing to severe involuntary movements, we added amantadine (100 mg/day), clonazepam (1 mg/day), and haloperidol (0.75 mg/day). 4 weeks after prescribing medications (the baseline time point), the patient was able to try an oral diet.</p> <p>6 weeks after the baseline time point, the patient could sit on the bed for a few minutes</p> |                                            |

Contd...

**Supplemental Table 2: Contd...**

| Main author     | Comorbidities besides LTM indication                        | LTM dose (mg) | LTM levels | Time from LTM start to symptoms                                                                                                                                                          | Time from management to recovery | Follow-up         | Important CH and CM                                                                                                                                                                                                                                                                                                                                                                                                                                                                                                                                                                                                                                                       | Neurological symptoms and clinical examination                               | Neuroimaging - CT scan, brain MRI, and EEG                                                                                                                                                                                                                                                                              |
|-----------------|-------------------------------------------------------------|---------------|------------|------------------------------------------------------------------------------------------------------------------------------------------------------------------------------------------|----------------------------------|-------------------|---------------------------------------------------------------------------------------------------------------------------------------------------------------------------------------------------------------------------------------------------------------------------------------------------------------------------------------------------------------------------------------------------------------------------------------------------------------------------------------------------------------------------------------------------------------------------------------------------------------------------------------------------------------------------|------------------------------------------------------------------------------|-------------------------------------------------------------------------------------------------------------------------------------------------------------------------------------------------------------------------------------------------------------------------------------------------------------------------|
| Rachamalla V    | Diabetes mellitus type 1, history of occasional cocaine use | 900 mg/day    | ...        | 77 days (unclear, but maybe it was 77 days after starting clozapine)                                                                                                                     | ...                              | ...               | The patient's psychiatric medication history included aripiprazole, risperidone, olanzapine, haloperidol, VPA, benzotropine, clonazepam, fluoxetine, and citalopram. Due to the lack of improvement with other antipsychotics, the patient was started on clozapine. The patient's other medications at the time included LTM, citalopram, clonazepam, and atenolol. In subsequent clinic visits, due to the worsening symptoms of stuttering, the patient and the parents decided to proceed with the tapering-off of LTM and the start of VPA. After 4 weeks of VPA (1000 mg/day), the patient and the family reported improvement in perioral twitching and stuttering | Rare infrequent orofacial DKN with perioral twitching, persistent stuttering | Brain MRI was normal. Abnormal waking and sleep EEG. Several episodes of generalized spike and wave activity of 3 Hz that lasted 2-3 s during photic stimulation and hyperventilation suggested epileptiform activity. Due to the intermittent form of this activity, we will hereafter refer to it as a "microseizure" |
| Fountoulakis KN | ...                                                         | 600 mg/day    | 0.6 mEq/L  | 15 years (The article does not report the exact time of the onset of symptoms, it only states that it started a few months ago. Despite the fact that the patient used LTM 15 years ago) | ...                              | ...               | Before using LTM, she was treated with neuroleptics and other forms of humor stabilizers                                                                                                                                                                                                                                                                                                                                                                                                                                                                                                                                                                                  | ...                                                                          | ...                                                                                                                                                                                                                                                                                                                     |
| Silva DG        | ...                                                         | ...           | 3.17 mEq/L | ...                                                                                                                                                                                      | 5 days                           | Complete recovery | Chorea and encephalopathy. Retrospective study of acute chorea in the emergency room                                                                                                                                                                                                                                                                                                                                                                                                                                                                                                                                                                                      | ...                                                                          | Brain MRI was normal                                                                                                                                                                                                                                                                                                    |
| <b>AKT</b>      |                                                             |               |            |                                                                                                                                                                                          |                                  |                   |                                                                                                                                                                                                                                                                                                                                                                                                                                                                                                                                                                                                                                                                           |                                                                              |                                                                                                                                                                                                                                                                                                                         |
| Loudon JB       | ...                                                         | ...           | 1.2 mEq/L  | 5 days. The symptoms started after adding haloperidol 12 mg/day                                                                                                                          | 4 weeks                          | ...               | 8-year history of manic-depressive illness. Symptoms caused by combination of drugs (LTM + haloperidol), also used procyclidine                                                                                                                                                                                                                                                                                                                                                                                                                                                                                                                                           | ATX, rigidity                                                                | ...                                                                                                                                                                                                                                                                                                                     |

Contd...

**Supplemental Table 2: Contd...**

| Main author         | Comorbidities besides LTM indication | LTM dose (mg)   | LTM levels | Time from LTM start to symptoms                                | Time from management to recovery           | Follow-up                                                 | Important CH and CM                                                                                                                                                                                                                                                                                                                                                                                                                                                      | Neurological symptoms and clinical examination                                                                                                                                                                                                                                                                     | Neuroimaging - CT scan, brain MRI, and EEG |
|---------------------|--------------------------------------|-----------------|------------|----------------------------------------------------------------|--------------------------------------------|-----------------------------------------------------------|--------------------------------------------------------------------------------------------------------------------------------------------------------------------------------------------------------------------------------------------------------------------------------------------------------------------------------------------------------------------------------------------------------------------------------------------------------------------------|--------------------------------------------------------------------------------------------------------------------------------------------------------------------------------------------------------------------------------------------------------------------------------------------------------------------|--------------------------------------------|
| Channabasavanna, SM | ...                                  | 900-1500 mg/day | 1.2 mEq/L  | 2 years (3 days after increasing dosage of LTM to 1500 mg/day) | 3 weeks                                    | ...                                                       | A local doctor suspected manic excitement and gave chlorpromazine 200 mg. This worsened his restlessness further. The patient was given promethazine IV 50 mg stat and again after an hour. Trihexyphenidyl 4 mg/day was added to LTM 1500 mg/day. AKT, dysarthria, and gait disturbances completely resolved within 36 h after starting anticholinergics. However, mild cogwheel rigidity and hand tremors persisted for >3 weeks                                       | Restlessness, inability to sit still even for a brief time, and an irresistible urge to pace the floor. Higher mental functions, fundi and superficial and deep reflexes were normal. Short, shuffling gait, without associated movements, rapid hand tremors, generalized cogwheel rigidity and dysarthric speech | EEG was normal                             |
| Price WA            | ...                                  | ...             | ...        | 10 days                                                        | 36 h                                       | ...                                                       | Her problems were cleared within 36 h with the addition of trihexyphenidyl 4 mg/day. LTM was not stopped                                                                                                                                                                                                                                                                                                                                                                 | ...                                                                                                                                                                                                                                                                                                                | ...                                        |
| Zubenko GS          | ...                                  | ...             | 0.8 mEq/L  | 1 year                                                         | 10 days after discontinuation of trazodone | ...                                                       | He was taking LTM + trazodone for over 1 year with no symptoms. However, just before the onset of his decompensation, his daily dosage of trazodone was increased from 200 to 300 mg/day. Trazodone was discontinued, and by the 10 <sup>th</sup> day, the symptoms of motor restlessness and anxiety had entirely remitted                                                                                                                                              | Inability to sit for more than a few moments at a time. Inability to fall asleep because could not find comfortable position. Motor restlessness                                                                                                                                                                   | ...                                        |
| Patterson JF        | ...                                  | 900 mg/day      | ...        | 1 week                                                         | 24 h                                       | Fully recovery. He was discharged to outpatient follow-up | He responded to haloperidol 20 mg/day. LTM 900 mg/day was started. Shortly after, he felt intense restlessness in his legs. Haloperidol was discontinued. However, AKT persisted. 1 week after discontinuation of haloperidol, LTM was discontinued, and the symptoms stopped within 24 h. 1 month after discharge, he started LTM 900 mg/day and he developed AKT in 24 h. The therapy was discontinued and frequent follow-up was substituted for prophylactic therapy | Intense restlessness on his legs and a compulsive need to move about the ward                                                                                                                                                                                                                                      | EEG and cranial CT scan were normal        |
| Yassa R             | LTM-induced hypothyroidism           | 1200 mg/day     | 0.75 mEq/L | 4 years                                                        | 48 h (after lorazepam 1 mg)                | After 1 year indicates no further recurrences             | Symptoms started 7 days before. The patient has been taking LTM for 4 years. For hypothyroidism, he took thyroid tablets 0.2 mg/day. He had not received neuroleptics for 8 years before admission                                                                                                                                                                                                                                                                       | Feeling jumpy, anxious, restless, and unable to sit still                                                                                                                                                                                                                                                          | ...                                        |

Contd...

**Supplemental Table 2: Contd...**

| Main author  | Comorbidities besides LTM indication | LTM dose (mg)   | LTM levels      | Time from LTM start to symptoms                                                                | Time from management to recovery | Follow-up                                                                                                                                                                         | Important CH and CM                                                                                                                                                                                                                                                                                                                                                                                                                                                        | Neurological symptoms and clinical examination                                                                                                                                 | Neuroimaging - CT scan, brain MRI, and EEG |
|--------------|--------------------------------------|-----------------|-----------------|------------------------------------------------------------------------------------------------|----------------------------------|-----------------------------------------------------------------------------------------------------------------------------------------------------------------------------------|----------------------------------------------------------------------------------------------------------------------------------------------------------------------------------------------------------------------------------------------------------------------------------------------------------------------------------------------------------------------------------------------------------------------------------------------------------------------------|--------------------------------------------------------------------------------------------------------------------------------------------------------------------------------|--------------------------------------------|
| Poyurovsky M | Drug abuse                           | 900-1500 mg/day | 0.58-0.94 mEq/L | 4 weeks and 3 days after restarting LTM, 3 days after raising the dose from 900 to 1500 mg/day | 1 week                           | No recurrence of AKT during 3 weeks of follow-up                                                                                                                                  | Present admission was due to unsuccessful attempt to discontinue LTM and levomepromazine. After AKT started, biperiden 4 mg/day was given; after 1 week, only partial improvement was noted. Biperiden was interrupted, and after 2 days washout, mianserin 15 mg per os was started. 7 days later, he had complete amelioration. AKT returned after mianserin discontinuation. Mianserin was rechallenged and led again to disappearance of symptoms                      | Restlessness, tension, irresistible urge to move. Unable to sit still for >2 min, had to constantly change body position. Diagnosed as acute AKT                               | ...                                        |
| Muthane UB   | Diabetic peripheral neuropathy       | 900 mg/day      | 1.5 mEq/L       | 10 days (unclear)                                                                              | ...                              | At follow-up 10 months later, her PKN features persisted despite being on amantadine for a day, she developed severe AKT. She worsened and developed disabling Orofacial DKN also | She was started on LTM 900 mg/day by her family physician. Her psychiatric symptoms improved dramatically 10 days later. Subsequently, following mild fever for a day, she developed severe AKT. She worsened and developed disabling PKN in the form of tremors and slowness. Within 4 days of stopping LTM, her PKN had improved with associated reduction of serum LTM level to 0.2 mEq/L. She was less AKT. However, at the end of a week, she developed orofacial DKN | AKT, PKN in the form of tremors and slowness, mutism, orofacial DKN                                                                                                            | ...                                        |
| Scorr L      | ...                                  | ...             | ...             | ...                                                                                            | ...                              | ...                                                                                                                                                                               | ...                                                                                                                                                                                                                                                                                                                                                                                                                                                                        | No previous exposure to neuroleptics. He presented with the sensation of beads and wire on his teeth, which he said led to constant restless movements of his tongue and mouth | ...                                        |
| Vandewalle W | ...                                  | ...             | ...             | ...                                                                                            | ...                              | ...                                                                                                                                                                               | Study that assessed the movement disorders caused by different antidepressants. AKT was associated with LTM in 1 individual                                                                                                                                                                                                                                                                                                                                                | ...                                                                                                                                                                            | ...                                        |
| Demir B      | ...                                  | 600 mg/day      | ...             | ...                                                                                            | ...                              | ...                                                                                                                                                                               | LTM replaced with VPA. The AKT did not respond to reducing the dose of risperidone and addition of propranolol and lorazepam                                                                                                                                                                                                                                                                                                                                               | ...                                                                                                                                                                            | ...                                        |

Contd...

**Supplemental Table 2: Contd...**

| Main author | Comorbidities besides LTM indication | LTM dose (mg) | LTM levels    | Time from LTM start to symptoms                          | Time from management to recovery | Follow-up | Important CH and CM                                                                                                                                                                                                                                                                                                                                                                                                                                                                                                                                                                                                                                                                                                                                      | Neurological symptoms and clinical examination                                                                                                                                                                             | Neuroimaging - CT scan, brain MRI, and EEG |
|-------------|--------------------------------------|---------------|---------------|----------------------------------------------------------|----------------------------------|-----------|----------------------------------------------------------------------------------------------------------------------------------------------------------------------------------------------------------------------------------------------------------------------------------------------------------------------------------------------------------------------------------------------------------------------------------------------------------------------------------------------------------------------------------------------------------------------------------------------------------------------------------------------------------------------------------------------------------------------------------------------------------|----------------------------------------------------------------------------------------------------------------------------------------------------------------------------------------------------------------------------|--------------------------------------------|
| Heiman EM   | ...                                  | 1800 mg/day   | 0.9 mEq/L     | ...                                                      | 48-72 h                          | ...       | LTM therapy was discontinued, and the patient was started on treatment with clonazepam 2 mg at bedtime                                                                                                                                                                                                                                                                                                                                                                                                                                                                                                                                                                                                                                                   | Nocturnal MCL aggravation - persistent and increasing jerking sensation on legs when tried to sleep. She described an "electric" sensation going slowly down her legs                                                      | ...                                        |
| Terao T     | ...                                  | 1000 mg/day   | 0.8-0.9 mEq/L | 9 days (approximate)                                     | 1 day after reduce dosage        | CR        | He started with lithium 800 mg/day and later added levomepromazine to insomnia (first 5 mg/night and later 15 mg/night). The patient reported an unpleasant creeping sensation in his lower legs at night and levomepromazine was discontinued. Because compulsive symptoms remained, we increased LTM to 1000 mg/day. On the night of the 13 <sup>th</sup> , he complained of a severe creeping sensation in his lower legs and an urge to move or rub them. As we suspected that LTM (0.8-0.9 mEq/L)-induced RLS, the dosage was reduced to 400 mg/day (0.3-0.4 mEq/L). The following day, RLS was alleviated and serum-free MHPG decreased to 3.5 ng/ml on the 20 <sup>th</sup> . Thereafter, he was put on LTM 400 mg/day without RLS and discharged | Creeping sensation in lower limbs at night, slight paresthesia and insomnia                                                                                                                                                | ...                                        |
| Kauta S     | Anxiety and DPS                      | ...           | ...           | 6 weeks before she sought help, right after starting LTM | ...                              | ...       | Her nocturnal urge to move her toes began when she was a teenager and progressively worsened over the years; however, she did not seek medical evaluation. She recalls that the urge worsened when she was treated with antidepressants (fluoxetine and sertraline), and as a result, she stopped taking these medications. At age 49, she was started on gabapentin for back pain, thought to be related to degenerative disk disease in her lumbar spine, and noticed that her toe-related symptoms completely resolved                                                                                                                                                                                                                                | Abnormal sensation in her toes described as a strong urge to squeeze her toes together while attempting to fall asleep at night. The symptoms were bilateral and would go away briefly when she pressed her toes together. | ...                                        |

Contd...

**Supplemental Table 2: Contd...**

| Main author | Comorbidities besides LTM indication | LTM dose (mg) | LTM levels | Time from LTM start to symptoms | Time from management to recovery | Follow-up | Important CH and CM                                                                                                                                                                                                                                                                                                                                                                                                                                                                                                                                                                                                                                                                                                                                                                                                                                                     | Neurological symptoms and clinical examination                                                                                                                                                 | Neuroimaging – CT scan, brain MRI, and EEG |
|-------------|--------------------------------------|---------------|------------|---------------------------------|----------------------------------|-----------|-------------------------------------------------------------------------------------------------------------------------------------------------------------------------------------------------------------------------------------------------------------------------------------------------------------------------------------------------------------------------------------------------------------------------------------------------------------------------------------------------------------------------------------------------------------------------------------------------------------------------------------------------------------------------------------------------------------------------------------------------------------------------------------------------------------------------------------------------------------------------|------------------------------------------------------------------------------------------------------------------------------------------------------------------------------------------------|--------------------------------------------|
| Demirci K   | ...                                  | 600 mg/day    | ...        | ...                             | 2 weeks                          | CR        | She developed these symptoms when she had received LTM 300 mg with quetiapine 300 mg at the same time at nights. The woman was recommended to take LTM 300 mg in the morning and in the afternoon with subsequent doses of lithium 300 mg and quetiapine 300 mg in the evening with 2 h intervals. Her symptoms started to disappear from the 1 <sup>st</sup> day of this regimen, and 2 weeks later, her symptoms completely resolved, and she did not show any subsequent symptoms                                                                                                                                                                                                                                                                                                                                                                                    | Symmetric reflexes<br>In her lower extremities with no gross evidence of abnormalities in pain sensation or proprioception<br>Restlessness, urge to move legs, numbness, and tingle sensations | ...                                        |
| Chen PH     | ...                                  | 600 mg/day    | ...        | ...                             | ...                              | CR        | He tried suicide with 40 years, and psychopharmacotherapy with sertraline was provided at that time in the psychiatric ward to treat his acute DFS. After admission, escitalopram 20 mg/day and LTM 600 mg/day were administered. After 3 weeks on this drug regimen, his depressive symptoms had not remitted. Consequently, quetiapine 100 mg/day was added to the treatment regimen. 1 week later, when the 100 mg/day dosage proved to be ineffective, the dosage of quetiapine was increased to 150 mg/day. Within 24 h, he began to experience paresthesias and an urge to move his uncomfortable legs during the night. He had a remission of depressive symptoms while he was receiving combination treatment with escitalopram 20 mg/day, LTM 600 mg/day, and lamotrigine 50 mg/day. After quetiapine withdrawal, the symptoms of RLS were completely resolved | Paresthesias and an urge to move his uncomfortable legs during the night                                                                                                                       | ...                                        |
| Öhlund L    | ...                                  | ...           | ...        | ...                             | ...                              | ...       | ...                                                                                                                                                                                                                                                                                                                                                                                                                                                                                                                                                                                                                                                                                                                                                                                                                                                                     | ...                                                                                                                                                                                            | ...                                        |

Contd...

## Supplemental Table 2: Contd...

| Main author | Comorbidities besides LTM indication                                                 | LTM dose (mg) | LTM levels      | Time from LTM start to symptoms | Time from management to recovery | Follow-up | Important CH and CM                                                                                                                                                                                                                                                                                                                                                                                                                                                                                                                                                                                                                                                                                                                                              | Neurological symptoms and clinical examination                                                                                                                                                                                                                                                                                                                                                   | Neuroimaging - CT scan, brain MRI, and EEG |
|-------------|--------------------------------------------------------------------------------------|---------------|-----------------|---------------------------------|----------------------------------|-----------|------------------------------------------------------------------------------------------------------------------------------------------------------------------------------------------------------------------------------------------------------------------------------------------------------------------------------------------------------------------------------------------------------------------------------------------------------------------------------------------------------------------------------------------------------------------------------------------------------------------------------------------------------------------------------------------------------------------------------------------------------------------|--------------------------------------------------------------------------------------------------------------------------------------------------------------------------------------------------------------------------------------------------------------------------------------------------------------------------------------------------------------------------------------------------|--------------------------------------------|
| Netski AL   | ...                                                                                  | 1200 mg/day   | 0.7 mEq/L       | 1 month                         | ...                              | ...       | Persistent developmental stutter since childhood. He had a history of DPS for the past 4-5 years and was receiving fluoxetine 20 mg/day. During this recent manic episode, the patient was hospitalized, and LTM was added to fluoxetine for treatment of BD. The patient's mood was stabilized on LTM at a dose of 1200 mg/day. 1 month following treatment initiation, the patient experienced lightheadedness, hand tremor, and worsening of stutter. LTM was tapered off in this patient; due to these changes, treatment with VPA was started, which was successful in continued stabilization of his mood at a dose of 2750 mg/day and a blood concentration of 87 µg/mL. His stutter returned to baseline within a few weeks of discontinuing LTM therapy | 1 month following treatment initiation, the patient experienced lightheadedness, hand tremor, and worsening of stutter                                                                                                                                                                                                                                                                           | ...                                        |
| Gulack BC   | Attention-deficit/hyperactivity disorder, conduct disorder, developmental stuttering | 1800 mg/day   | 0.62-1.24 mEq/L | ...                             | 2 days                           | ...       | LTM was started at 150/day during the 3 <sup>rd</sup> week of the patient's hospitalization to target symptoms of mania. The patient had been on oral risperidone since admission, and the dose was increased to 4 mg at bedtime 1 week before starting LTM. He was prescribed oral clonidine on admission and the dose was increased to 0.1 mg 3 times daily 2 weeks before starting LTM. When the LTM dose was increased to 1800 mg/day to better control the BD, his developmental stutter worsened. When the LTM dose was reduced to 600 mg in the morning and 900 mg at night, the stutter returned to baseline                                                                                                                                             | The stutter consisted of syllable repetitions, occurred only at the beginning of sentences, and did not bother the patient. He began having trouble expressing himself, had to engage in circumlocutions, and became distressed about his stutter. He showed no specific signs of LTM toxicity such as confusion, lethargy, tremor, ataxia, myoclonic jerks, polyuria, or gastrointestinal upset | ...                                        |

Contd...



**Supplemental Table 2: Contd...**

| Main author  | Comorbidities besides LTM indication | LTM dose (mg) | LTM levels | Time from LTM start to symptoms | Time from management to recovery | Follow-up | Important CH and CM                                                                                                                                                                                                                                                                                                                                                                                                                                                                                                    | Neurological symptoms and clinical examination                                                                                                                                          | Neuroimaging - CT scan, brain MRI, and EEG                            |
|--------------|--------------------------------------|---------------|------------|---------------------------------|----------------------------------|-----------|------------------------------------------------------------------------------------------------------------------------------------------------------------------------------------------------------------------------------------------------------------------------------------------------------------------------------------------------------------------------------------------------------------------------------------------------------------------------------------------------------------------------|-----------------------------------------------------------------------------------------------------------------------------------------------------------------------------------------|-----------------------------------------------------------------------|
| Sabillo S    | Dementia, epilepsy                   | ...           | 2.0 mEq/L  | ...                             | 2 weeks                          | ...       | Chronic medications included donepezil, pramipexole, risperidone, and LTM. 1 day, she complained to her nurse that she had been stuttering, finding it difficult to complete a sentence, as well as sing. She grew increasingly bothered by her faltering speech as the days wore on and also pointed out that her grip on objects was becoming weak. Her attending physician was subsequently informed of these new symptoms. Physical and neurological examinations were unremarkable aside from her obvious stutter | Stuttering, finding it difficult to complete a sentence. Her grip on objects was becoming weak. Physical and neurological examinations were unremarkable aside from her obvious stutter | Cranial CT scan was normal                                            |
| Helmchen H   | ...                                  | ...           | ...        | ...                             | ...                              | ...       | ...                                                                                                                                                                                                                                                                                                                                                                                                                                                                                                                    | ...                                                                                                                                                                                     | Abnormal EEG                                                          |
| Kemperman CJ | ...                                  | ...           | 2.3 mEq/L  | ...                             | ...                              | ...       | These EEG abnormalities decreased the weeks thereafter                                                                                                                                                                                                                                                                                                                                                                                                                                                                 | ...                                                                                                                                                                                     | EEG showed periodic sharp waves, triphasic waves, and diffuse slowing |

**CJLS**

Contd...

## Supplemental Table 2: Contd...

| Main author | Comorbidities besides LTM indication | LTM dose (mg) | LTM levels | Time from LTM start to symptoms                                                                      | Time from management to recovery                                                                                                                                     | Follow-up                                                                                                                       | Important CH and CM                                                                                                                                                                                                                                                                                                                                                                                                                                                                                                                                                                                                                                                                                                                                                                                                                                                                   | Neurological symptoms and clinical examination                                                                  | Neuroimaging - CT scan, brain MRI, and EEG                                                                                                                                                                                  |
|-------------|--------------------------------------|---------------|------------|------------------------------------------------------------------------------------------------------|----------------------------------------------------------------------------------------------------------------------------------------------------------------------|---------------------------------------------------------------------------------------------------------------------------------|---------------------------------------------------------------------------------------------------------------------------------------------------------------------------------------------------------------------------------------------------------------------------------------------------------------------------------------------------------------------------------------------------------------------------------------------------------------------------------------------------------------------------------------------------------------------------------------------------------------------------------------------------------------------------------------------------------------------------------------------------------------------------------------------------------------------------------------------------------------------------------------|-----------------------------------------------------------------------------------------------------------------|-----------------------------------------------------------------------------------------------------------------------------------------------------------------------------------------------------------------------------|
| Smith SJ    | ...                                  | 250 mg/day    | 1.2 mEq/L  | 2 months later after she was treated with benzhexol hydrochloride and Madopar (levodopa/benserazide) | 3 weeks after stop all medication                                                                                                                                    | ...                                                                                                                             | <p>Patient used LTM for 32 years, no symptoms. Mild PKN was diagnosed, and she was treated with benzhexol hydrochloride and levodopa/benserazide. 2 months later, she developed the sequelae. She became confused and withdrawn. She deteriorated over the ensuing few weeks, becoming bed-bound, mute, and incontinent with coarse tremor in both arms. All treatment (LTM, promethazine, chlorpheniramine, indomethacin, and Madopar) was stopped. Over the next 3 weeks, her mental state improved, and she could walk unaided</p> <p>She had been treated for 10 years with LTM 800 mg/day, blood levels being monitored regularly. 1 month before developing neurological symptoms, she had an operation for knee replacement. In the next few days, she vomited several times but had no diarrhea. She became confused and deteriorated during the 2 weeks before admission</p> | <p>There was generalized hyperreflexia, bilaterally extensor plantar response, and bilateral grasp reflexes</p> | <p>EEG showed a slow dominant rhythm of 4-6 Hz, with fast rhythms (12-16 Hz) and runs of periodic sharp waves, some with a triphasic outline, at 1.5-2 Hz. There were occasional episodes of high amplitude delta waves</p> |
| ...         | ...                                  | 800 mg/day    | 3.2 mEq/L  | 1 month                                                                                              | 15 days. The myoclonic jerks disappeared after 3 days, and after a phase of perseveration and emotional lability, the mental state had returned to normal by 10 days | <p>Three further EEGs recorded at 3, 7, and 15 days after admission showed steady improvement with return of normal rhythms</p> | <p>On examination, she was uncooperative, confused, and only occasionally responding to simple commands. There were irregular twitching movements of the face and lips and MCL movements of the limbs at rest, more obvious when the limbs were passively moved, but not affected by sudden noise. Tone in the limbs was slightly increased, power and reflexes were normal, plantars were absent</p>                                                                                                                                                                                                                                                                                                                                                                                                                                                                                 | <p>EEG showed widespread slow activity and runs of periodic sharp waves (1-2.5 Hz)</p>                          |                                                                                                                                                                                                                             |

Contd...

**Supplemental Table 2: Contd...**

| Main author  | Comorbidities besides LTM indication                          | LTM dose (mg)                | LTM levels | Time from LTM start to symptoms | Time from management to recovery               | Follow-up                                                                               | Important CH and CM                                                                                                                                                                                                                                                                                                                                                                                                                                                                                                                                                                                                                        | Neurological symptoms and clinical examination                                                                                                          | Neuroimaging - CT scan, brain MRI, and EEG                                                                                                                                                                                                      |
|--------------|---------------------------------------------------------------|------------------------------|------------|---------------------------------|------------------------------------------------|-----------------------------------------------------------------------------------------|--------------------------------------------------------------------------------------------------------------------------------------------------------------------------------------------------------------------------------------------------------------------------------------------------------------------------------------------------------------------------------------------------------------------------------------------------------------------------------------------------------------------------------------------------------------------------------------------------------------------------------------------|---------------------------------------------------------------------------------------------------------------------------------------------------------|-------------------------------------------------------------------------------------------------------------------------------------------------------------------------------------------------------------------------------------------------|
| Broussolle E | Parkinson's disease                                           | 12,000 mg/day (intoxication) | ...        | 6 days                          | 5 days after LTM withdrawal                    | ...                                                                                     | Since the patient presented with an atypical PKN with DPS, levodopa plus LTM therapy was started. On the 10 <sup>th</sup> day after admission, levodopa (without dopa decarboxylase inhibitor) was introduced progressively, reaching a daily dose of 2 g within 6 days. LTM gluconate at a daily dose of 12 g was added 13 days after admission. On the 19 <sup>th</sup> day, the patient became confused and agitated, and treatment was stopped. Nonetheless, she worsened during the next 48 h, presenting with a precomatose state, mutism, rigidity, sporadic jerks that were prominent in the lower limbs, and urinary incontinuity | Rigidity, sporadic MCL that was prominent in the lower limbs, and urinary incontinuity. Akinesia, tremor prominent in the left lower limb, bradyphrenia | EEG with increased theta activity of 5 Hz and delta activity, predominantly in the frontal fields; triphasic waves and sharp waves particularly in the frontal fields, that were not synchronized with the concomitant jerks of the upper limbs |
| Primavera A  | ...                                                           | 450 mg/day                   | ...        | ...                             | ...                                            | ...                                                                                     | ...                                                                                                                                                                                                                                                                                                                                                                                                                                                                                                                                                                                                                                        | ...                                                                                                                                                     | ...                                                                                                                                                                                                                                             |
|              | ...                                                           | ...                          | 2.6 mEq/L  | ...                             | ...                                            | ...                                                                                     | ...                                                                                                                                                                                                                                                                                                                                                                                                                                                                                                                                                                                                                                        | Organic brain syndrome with choreoathetoid movements and action MCL was associated with elevated serum levels (2-6 mEq/L)                               | ...                                                                                                                                                                                                                                             |
| Waldman AJ   | Congestive heart failure, gout, COPD, coronary artery disease | ...                          | ...        | ...                             | 1 week after discontinuation of all medication | ...                                                                                     | She was seeing more than 1 psychiatrist and besides LTM she was taking trazodone, benzotropine, methylphenidate, warfarin, trifluoperazine, theophylline, allopurinol, diltiazem, alprazolam, estrogen, albuterol inhaler, and cimetidine                                                                                                                                                                                                                                                                                                                                                                                                  | Tremor on all upper limbs                                                                                                                               | ...                                                                                                                                                                                                                                             |
| Finelli PF   | ...                                                           | ...                          | ...        | ...                             | 12 days                                        | 1 month after discharge, the patient was cognitively intact and a repeat EEG was normal | He was taking LTM and nortriptyline                                                                                                                                                                                                                                                                                                                                                                                                                                                                                                                                                                                                        | Myoclonic jerks, fasciculation, and a postural tremor were noted along with a positive stare and unsteady gait with retropulsion                        | EEG showed slowing delta range. Brain MRI showed mild atrophy                                                                                                                                                                                   |

Contd...

**Supplemental Table 2: Contd...**

| Main author     | Comorbidities besides LTM indication | LTM dose (mg) | LTM levels       | Time from LTM start to symptoms | Time from management to recovery                                                                   | Follow-up | Important CH and CM                                                                                                                                                                                                                                                                                                                                                                                                                                                                                                                                                                                                                                                                                                                                                                                                                               | Neurological symptoms and clinical examination                                                                                                                                    | Neuroimaging - CT scan, brain MRI, and EEG                                                                                                                                                                                                                     |
|-----------------|--------------------------------------|---------------|------------------|---------------------------------|----------------------------------------------------------------------------------------------------|-----------|---------------------------------------------------------------------------------------------------------------------------------------------------------------------------------------------------------------------------------------------------------------------------------------------------------------------------------------------------------------------------------------------------------------------------------------------------------------------------------------------------------------------------------------------------------------------------------------------------------------------------------------------------------------------------------------------------------------------------------------------------------------------------------------------------------------------------------------------------|-----------------------------------------------------------------------------------------------------------------------------------------------------------------------------------|----------------------------------------------------------------------------------------------------------------------------------------------------------------------------------------------------------------------------------------------------------------|
| Casanova B      | ...                                  | 1200 mg/day   | 1.03 mEq/L       | 4 months                        | 3 weeks after admission                                                                            | ...       | He has been successfully treated with LTM and lorazepam 1 mg/day for 2 years                                                                                                                                                                                                                                                                                                                                                                                                                                                                                                                                                                                                                                                                                                                                                                      | Generalized hyperreflexia, bilaterally extensor plantar response, cogwheel rigidity, and archaic reflexes. MCL, PKN, akinesia, inability to walk, sphincter incontinence          | First EEG showed widespread background slowing and disorganization with mixed frequencies in the theta range and scarce alpha activity accompanied by generalized sharp waves of variable frequency, maximal posteriorly and occasionally repetitive at 1-2 Hz |
| Masmoudi K      | ...                                  | ...           | ...              | ...                             | ...                                                                                                | ...       | Long-term LTM use                                                                                                                                                                                                                                                                                                                                                                                                                                                                                                                                                                                                                                                                                                                                                                                                                                 | ...                                                                                                                                                                               | ...                                                                                                                                                                                                                                                            |
| Laasonen-Balk T | ...                                  | Intoxication  | ...              | ...                             | ...                                                                                                | ...       | ...                                                                                                                                                                                                                                                                                                                                                                                                                                                                                                                                                                                                                                                                                                                                                                                                                                               | ...                                                                                                                                                                               | ...                                                                                                                                                                                                                                                            |
| Takahashi M     | ...                                  | ...           | Intoxication     | 7 years                         | 3 weeks                                                                                            | ...       | She subsequently developed dysphagia, dysarthria, unsteady gait, and progressive deterioration of the higher cortical function over 1.5 months. The plasma concentration of LTM was found to be over the therapeutic range. Reduction of LTM dose almost completely resolved her symptoms within 3 weeks                                                                                                                                                                                                                                                                                                                                                                                                                                                                                                                                          | Mild tremulousness of both hands. Dysarthria, unsteady gait, and progressive deterioration of the higher cortical function. Her tremulousness deteriorated until it resembled MCL | EEG showed periodic sharp wave complexes appearing predominantly over the bilateral parieto-occipital areas                                                                                                                                                    |
| Kikyo H         | ...                                  | 600 mg/day    | 0.82 mEq/L (CSF) | ...                             | Full recovery 21 days after admission. MCL was gone 3 days after starting (2 days after admission) | ...       | Admitted with coma and MCL. She had a history of manic and depressive disease for 8 years and had been treated with 200 mg LTM carbonate, 25 mg chlorpromazine, and 10 mg levomepromazine daily. Her first symptom was forgetfulness, then appetite loss, diarrhea, MCL, and gait disturbance. At the same time, she complained of visual disturbance. Gradually, her conscious level declined. When she was admitted, she had convulsions. At that time, she was injected with 200 mg phenobarbitone intramuscularly, and this was continued for 2 more days at the same dose. Her MCL disappeared and her conscious level gradually improved. She was discharged on June 25 fully recovered. The cause of her high LTM concentration was clear with the discovery that she took three times as much as prescribed when she could not sleep well | Forgetfulness, MCL, gait disturbance, visual disturbance, convulsions, coma. Neurologically, there were general hypotonus and hyporeflexia without Babinski's sign                | EEG showed slow basic activity and periodic synchronous discharges. Cranial CT scan and brain MRI were normal                                                                                                                                                  |

Contd...

**Supplemental Table 2: Contd...**

| Main author | Comorbidities besides LTM indication | LTM dose (mg) | LTM levels | Time from LTM start to symptoms | Time from management to recovery | Follow-up                                                                                                                                                                         | Important CH and CM                                                                                                                                                                                                                                                 | Neurological symptoms and clinical examination                                                                                                                                                                                                                        | Neuroimaging - CT scan, brain MRI, and EEG                                                                                   |
|-------------|--------------------------------------|---------------|------------|---------------------------------|----------------------------------|-----------------------------------------------------------------------------------------------------------------------------------------------------------------------------------|---------------------------------------------------------------------------------------------------------------------------------------------------------------------------------------------------------------------------------------------------------------------|-----------------------------------------------------------------------------------------------------------------------------------------------------------------------------------------------------------------------------------------------------------------------|------------------------------------------------------------------------------------------------------------------------------|
| Slama M     | Dementia, Parkinson's disease        | ...           | 1.3 mEq/L  | 13 years (approximately)        | 32 days                          | 78 days after admission, clinical examination was mainly normal apart from memory disorders concerning recent events, temporospatial disorientation, and a slight speech disorder | The onset of deep coma and respiratory distress secondary to bronchopulmonary congestion required intubation and mechanical ventilation                                                                                                                             | Neurological examination revealed temporospatial disorientation, resting tremor of the upper limbs, diffuse MCL, and generalized hyperreflexia                                                                                                                        | EEG revealed a slowed background activity and a generalized periodic activity suggestive of Creutzfeldt-Jakob encephalopathy |
| Mouldi S    | ...                                  | ...           | ...        | 9 years                         | ...                              | ...                                                                                                                                                                               | Progressive dementia with MCL and cerebellar syndrome suggesting a diagnosis of Creutzfeldt-Jakob encephalopathy. The results of the different investigations and the favorable course after discontinuation of LTM were in favor of diagnosis of drug-induced CJLS | MCL and cerebellar syndrome suggesting a diagnosis of Creutzfeldt-Jakob encephalopathy                                                                                                                                                                                | ...                                                                                                                          |
| Isikay CT   | ...                                  | ...           | 1.88 mEq/L | ...                             | Death                            | ...                                                                                                                                                                               | Her first symptoms were anorexia, nausea, vomiting, diarrhea, and fever that started 1 month before admission                                                                                                                                                       | Declined consciousness, fever, and generalized seizures. Systemic symptoms of LTM toxicity such as anorexia, nausea, vomiting, diarrhea, and insomnia for 1 month. Neurological examination disclosed declined consciousness, generalized hypotonia, and hyporeflexia | EEG showed widespread periodic sharp waves, some with a triphasic pattern                                                    |
| Kim SW      | ...                                  | ...           | ...        | ...                             | ...                              | ...                                                                                                                                                                               | Patient who was treated with LTM and developed subacute MCL and cognitive dysfunction                                                                                                                                                                               | ...                                                                                                                                                                                                                                                                   | Changes in perfusion pattern identified using brain SPECT                                                                    |

Contd...

**Supplemental Table 2: Contd...**

| Main author        | Comorbidities besides LTM indication          | LTM dose (mg) | LTM levels | Time from LTM start to symptoms | Time from management to recovery                                                                                                                          | Follow-up | Important CH and CM                                                                                                                                                                                                                           | Neurological symptoms and clinical examination                                                      | Neuroimaging - CT scan, brain MRI, and EEG                                                                                                                                                                                                                                                                                                                                                                                                                                                                                                                                                                                                                                                                                                                                                                                                                                                                                                                                                                                                                                                                                                                                                                                                                                                                                                                                                   |
|--------------------|-----------------------------------------------|---------------|------------|---------------------------------|-----------------------------------------------------------------------------------------------------------------------------------------------------------|-----------|-----------------------------------------------------------------------------------------------------------------------------------------------------------------------------------------------------------------------------------------------|-----------------------------------------------------------------------------------------------------|----------------------------------------------------------------------------------------------------------------------------------------------------------------------------------------------------------------------------------------------------------------------------------------------------------------------------------------------------------------------------------------------------------------------------------------------------------------------------------------------------------------------------------------------------------------------------------------------------------------------------------------------------------------------------------------------------------------------------------------------------------------------------------------------------------------------------------------------------------------------------------------------------------------------------------------------------------------------------------------------------------------------------------------------------------------------------------------------------------------------------------------------------------------------------------------------------------------------------------------------------------------------------------------------------------------------------------------------------------------------------------------------|
| Fernández-Torre JL | Diabetes mellitus type 2, Parkinson's disease | 600 mg/day    | 4.2 mEq/L  | ...                             | 12 days. She had a normal mental state and the fourth EEG showed a normal background activity with occasional FIRDA. The serum LTM level was undetectable | ...       | Admitted for slowly progressive psychomotor agitation, mutism, and nocturnal MCL for the last 10 days. She was using levodopa (250 mg/day). LTM (600 mg/day), and aripiprazole (5 mg/day). She was treated with IV hydration and hemodialysis | There were occasional jerks affecting the lower limbs with cogwheel rigidity, but tremor was absent | Cranial CT scan showed cerebral atrophy. EEG revealed a slowing of the background activity with frequent runs of generalized PSWC of triphasic morphology occurring at a rate of 2.0 Hz. PSWC consisted of three phases: A surface positive high-amplitude wave preceded and followed by negative components with smaller amplitude. These waves had frontopolar or frontocentral predominance, and spread with an anterior-posterior time lag on bipolar derivations. PSWCs showed a dipolar distribution of the electrical field, observing maximal electropositivity on the frontal areas and electronegativity on the parieto-temporo-occipital regions. PSWC was not affected by eye opening or stimuli. During the recording, the patient experienced myoclonic jerks of both legs, not associated with PSWC or epileptiform discharges. To help distinguish between toxic encephalopathy and NCSE, they administered 5 mg of IV diazepam, after which PSWC amplitude attenuated slightly, occurred more frequently along with abundant superimposed fast activity. A third EEG revealed frequent generalized bursts of intermittent delta activity with frontal maximum (FIRDA) that occasionally assumed a triphasic appearance with sharp components. On day 12, the patient had a normal mental state and the fourth EEG showed a normal background activity with occasional FIRDA |

*Contd...*

**Supplemental Table 2: Contd...**

| Main author    | Comorbidities besides LTM indication | LTM dose (mg) | LTM levels | Time from LTM start to symptoms | Time from management to recovery | Follow-up                                                                                                                                                                                                                                                                                                                                   | Important CH and CM                                                                                                                                                                                                                                                                                                                                                                                                                                                                                                                                                                                                                                                                                                                  | Neurological symptoms and clinical examination                                                                                                                                                     | Neuroimaging - CT scan, brain MRI, and EEG                                                                                                                                             |
|----------------|--------------------------------------|---------------|------------|---------------------------------|----------------------------------|---------------------------------------------------------------------------------------------------------------------------------------------------------------------------------------------------------------------------------------------------------------------------------------------------------------------------------------------|--------------------------------------------------------------------------------------------------------------------------------------------------------------------------------------------------------------------------------------------------------------------------------------------------------------------------------------------------------------------------------------------------------------------------------------------------------------------------------------------------------------------------------------------------------------------------------------------------------------------------------------------------------------------------------------------------------------------------------------|----------------------------------------------------------------------------------------------------------------------------------------------------------------------------------------------------|----------------------------------------------------------------------------------------------------------------------------------------------------------------------------------------|
| Madhusudhan BK | ...                                  | ...           | 4.7 mEq/L  | 25 years                        | ...                              | ...                                                                                                                                                                                                                                                                                                                                         | Laboratory tests revealed leukocytosis (13,450 cells/mm <sup>3</sup> ), hyponatremia (128), and elevated serum creatinine (2.3 mg/dL). Considering the toxicity of lithium, we started hemodialysis. However, in spite of 3 cycles of dialysis, decreased lithium levels (1.2) and other normal parameters, the patient remained unconscious. Considering the clinical possibility of NCSE, she got an EEG. She was treated with IV lorazepam. She showed gradual improvement in her sensorium that correlated with the decline in blood LTM levels and the return of a normal background alpha rhythm on EEG. At the time of discharge, she had recovered completely, with no apparent neurological deficit or cognitive impairment | Neurologically, the patient was comatose, her pupils were small and reactive, and her extraocular movements were restricted, with generalized hypotonia, hyporeflexia, and no other focal deficits | The EEG demonstrated bimiphasic slowing (4-5 Hz theta range) with bilateral periodic triphasic waves of 1-2 Hz frequency, similar to the EEG changes seen in Creutzfeldt-Jakob disease |
| <b>DTN</b>     |                                      |               |            |                                 |                                  |                                                                                                                                                                                                                                                                                                                                             |                                                                                                                                                                                                                                                                                                                                                                                                                                                                                                                                                                                                                                                                                                                                      |                                                                                                                                                                                                    |                                                                                                                                                                                        |
| Aronson TA     | ...                                  | ...           | ...        | ...                             | ...                              | ...                                                                                                                                                                                                                                                                                                                                         | He was initially treated successfully with LTM, but this had to be discontinued because of troublesome side effects. Symptoms started after use of haloperidol. Other medications: Tranylcypromine, desipramine, haloperidol, diphenhydramine                                                                                                                                                                                                                                                                                                                                                                                                                                                                                        | DTN reaction with protruding tongue and dysarthria, generalized rigidity, bradykinesia, mask-like facies, pill rolling tremor, dysarthria, and a shuffling gait                                    | ...                                                                                                                                                                                    |
| Goetting MG    | ...                                  | 300 mg/1x     | 1.0 mEq/L  | 9 h                             | 3 h                              | During the following 3 h, her DTN and hyperreflexia disappeared and her speech became clear. 5 h after the 1 <sup>st</sup> LTM level, she had a new level of 0.78 mEq/L. This gradually declined during the next 2 days. She remained asymptomatic. 2 years after the ingestion, she is a bright, coordinated child without apparent defect | Syrup of ipecac was administered, promptly resulting in a large emesis. She was treated with IV saline infusion                                                                                                                                                                                                                                                                                                                                                                                                                                                                                                                                                                                                                      | DTN and hyperreflexia. Slurred speech and she repetitively puckered and licked her lips. The cranial nerve examination findings were normal. There was no nystagmus.                               | ...                                                                                                                                                                                    |

Contd...

**Supplemental Table 2: Contd...**

| Main author | Comorbidities besides LTM indication | LTM dose (mg) | LTM levels | Time from LTM start to symptoms | Time from management to recovery | Follow-up | Important CH and CM                                                                                                                                                                                                                                                                                                                                                                                                      | Neurological symptoms and clinical examination                                                                                                                                                                                                                                                                                                                                                                                                                                                                                                                                                                                                                                                                                                                                        | Neuroimaging - CT scan, brain MRI, and EEG |
|-------------|--------------------------------------|---------------|------------|---------------------------------|----------------------------------|-----------|--------------------------------------------------------------------------------------------------------------------------------------------------------------------------------------------------------------------------------------------------------------------------------------------------------------------------------------------------------------------------------------------------------------------------|---------------------------------------------------------------------------------------------------------------------------------------------------------------------------------------------------------------------------------------------------------------------------------------------------------------------------------------------------------------------------------------------------------------------------------------------------------------------------------------------------------------------------------------------------------------------------------------------------------------------------------------------------------------------------------------------------------------------------------------------------------------------------------------|--------------------------------------------|
| Yazici O    | ...                                  | ...           | 1.0 mEq/L  | ...                             | ...                              | ...       | A combined treatment of LTM and thioridazine (400 mg/day) was initiated. Neuroleptic treatment was gradually decreased over 3 weeks and discontinued, while the LTM level was maintained at approximately 1 mEq/L. By the end of the 4 weeks, the patient almost resumed her premorbid mood and was discharged to be followed up, maintaining a serum LTM level of 0.8 mEq/L. After discharge, torticollis was observed. | While sitting, her posture was wavering. Purposeful arm movements were uncoordinated. Intermittently, her lips puckered and she displayed writhing tongue movements and lip smacking. There were episodes lasting several minutes in which her hands assumed an extended posture with wrist flexion and her legs were extended with scissoring. Her tone was increased throughout with brisk DTRs, but Babinski signs and clonus were absent. Gait was not tested<br>Torticollis was observed, appearing initially as a slight rotation of the neck to the left which aggravated in time to result in a DTN posture persisting for 4-5 s. DTN in the neck, tendency to posturing, an internal rotation of the left arm starting from the shoulder, and pain in the left arm and wrist |                                            |

Contd...



**Supplemental Table 2: Contd...**

| Main author | Comorbidities besides LTM indication | LTM dose (mg) | LTM levels | Time from LTM start to symptoms | Time from management to recovery | Follow-up                                                                                                                                                                                                                                                                                  | Important CH and CM                                                                                                                                                                                                                                                                                                                                                                                                                                                                                                                                                                                                                                                                                                                                                                                                                                                                                                                                                                                                                                                                                                                                                                                                                                                                                                                                                                                                                                                                                                                                                                                                                                                                                                                                                                                                                                                           | Neurological symptoms and clinical examination | Neuroimaging - CT scan, brain MRI, and EEG |
|-------------|--------------------------------------|---------------|------------|---------------------------------|----------------------------------|--------------------------------------------------------------------------------------------------------------------------------------------------------------------------------------------------------------------------------------------------------------------------------------------|-------------------------------------------------------------------------------------------------------------------------------------------------------------------------------------------------------------------------------------------------------------------------------------------------------------------------------------------------------------------------------------------------------------------------------------------------------------------------------------------------------------------------------------------------------------------------------------------------------------------------------------------------------------------------------------------------------------------------------------------------------------------------------------------------------------------------------------------------------------------------------------------------------------------------------------------------------------------------------------------------------------------------------------------------------------------------------------------------------------------------------------------------------------------------------------------------------------------------------------------------------------------------------------------------------------------------------------------------------------------------------------------------------------------------------------------------------------------------------------------------------------------------------------------------------------------------------------------------------------------------------------------------------------------------------------------------------------------------------------------------------------------------------------------------------------------------------------------------------------------------------|------------------------------------------------|--------------------------------------------|
|             | ...                                  | ...           | 0.9 mEq/L  | ...                             | ...                              | <p>After her discharge, although she gave up her treatment and missed her follow-up, we were able to obtain information about the recurrence of attacks and the continuance of the same pattern of tardive DTN. In our opinion, this case also has a tendency to become a rapid cycler</p> | <p>In the past, she had been prescribed a negligible amount of neuroleptics (haloperidol 5 mg/day; thioridazine 50 mg/day) and biperiden (2 mg/day) for prophylaxis from 1978 to 1982, after which neuroleptics were prescribed solely to treat attacks. DTN first emerging in 1984, while the patient was without medication and in a euthymic state, as a slight torsion of the head toward the left which was followed by persistent rotations. The attacks recurred, however, with increasing frequency in the following years. We noticed that with each manic attack, DTN disappeared completely or almost completely, only to recur in remission when the mood was restored to normal. DTN sometimes preceded the normalization of mood by a few days</p> <p>Nonpsychotic and psychotic depressive attack (with hypo manic phase) treated with low doses of antidepressants combined with various neuroleptics for 1-2 months. After an attack, she complied poorly to the proposed neuroleptic prophylaxis (haloperidol 5-10 mg/day) in the 8 months to follow. Many therapeutic attempts with amitriptyline (150 mg/day), haloperidol (10 mg/day), biperiden(4 mg/day), thioridazine (100-400 mg/day), carbamazepine (400-600 mg/day), tetrabenazine (100 mg/day), L-dopa (600 mg/day), and benserazide (150 mg/day). LTM prophylaxis was reinstated, although it could not be ensured that she complied sufficiently. DTN reappeared 1 month after the remission of the manic attack in 1988 in euthymic phase. No secondary causes of DTN were found. 2 weeks after the discontinuation of LTM, a manic attack emerged during which the DTN remitted, to recur during the anxious dysthymic period following the manic phase and to resume its former severity. The patient was discharged from the clinic in normal mood state, and her DTN improved slightly</p> |                                                |                                            |

Contd...

**Supplemental Table 2: Contd...**

| Main author    | Comorbidities besides LTM indication | LTM dose (mg) | LTM levels | Time from LTM start to symptoms | Time from management to recovery | Follow-up                                                                                                                                                                                                                                                       | Important CH and CM                                                                                                                                                                                                                                                                                                                                                                                                                                                                                                                                                                                                                                                                                                                                                                                                                                                                                                                                                                                                                                                                           | Neurological symptoms and clinical examination                                                                                          | Neuroimaging - CT scan, brain MRI, and EEG |
|----------------|--------------------------------------|---------------|------------|---------------------------------|----------------------------------|-----------------------------------------------------------------------------------------------------------------------------------------------------------------------------------------------------------------------------------------------------------------|-----------------------------------------------------------------------------------------------------------------------------------------------------------------------------------------------------------------------------------------------------------------------------------------------------------------------------------------------------------------------------------------------------------------------------------------------------------------------------------------------------------------------------------------------------------------------------------------------------------------------------------------------------------------------------------------------------------------------------------------------------------------------------------------------------------------------------------------------------------------------------------------------------------------------------------------------------------------------------------------------------------------------------------------------------------------------------------------------|-----------------------------------------------------------------------------------------------------------------------------------------|--------------------------------------------|
| Manji H        | ...                                  | ...           | ...        | ...                             | ...                              | No                                                                                                                                                                                                                                                              | At the time of admission, she was experiencing frequent and painful spasms which consisted of flexion of both arms, DTN posturing, and tremor of the right foot and leg. These required the administration of IV midazolam. Trials of tetrabenazine, pimozide, clonazepam, L-dopa + benserazide, carbamazepine, and LTM were unsuccessful. On stopping the LTM, the spasms worsened requiring larger and more frequent doses of midazolam. In view of her increasing exhaustion and severe discomfort, she was electively paralyzed with atracurium and ventilated. She was sedated with infusions of midazolam, propofol, and morphine for 10 days. By day 8, she was self-ventilating on midazolam. She was gradually weaned off midazolam, and during this period, she started on a combination of pimozide (gradually increasing to 12 mg/day), tetrabenazine 75 mg/day, and benzotropine. The latter was subsequently stopped because of urinary retention. She was discharged on tetrabenazine, pimozide, and intermittent oral clonazepam to be taken in the event of recurring spasms | Posttraumatic DTN, ... painful spasms which consisted of flexion of both arms, dystonic posturing, and tremor of the right foot and leg | ...                                        |
| Durrenberger S | ...                                  | ...           | ...        | ...                             | ...                              | ...                                                                                                                                                                                                                                                             | ...                                                                                                                                                                                                                                                                                                                                                                                                                                                                                                                                                                                                                                                                                                                                                                                                                                                                                                                                                                                                                                                                                           | Acute dystonic reaction to LTM and risperidone                                                                                          | ...                                        |
| Chakrabarti S  | ...                                  | 800 mg/day    | ...        | 3 years                         | ...                              | On follow-up 12 months later, he was on 150-200 mg of clozapine daily (VPA had been stopped) and showed remarkable improvement. He was euthymic, AIMS rating was down to 2, and disability was minimal. He was back at work and lead a more or less normal life | He had been stable on a combination of LTM 800 mg/day, carbamazepine 100 mg/day, and chlordiazepoxide 10 mg/day for 3 years, when he first started experiencing twisting of head and neck to the left side and arching of his back. The movements were worse when he was tense but disappeared during sleep. All drugs were stopped on his first visit to the outpatient department.                                                                                                                                                                                                                                                                                                                                                                                                                                                                                                                                                                                                                                                                                                          | EEG and cranial CT scan were normal                                                                                                     | ...                                        |

Contd...

**Supplemental Table 2: Contd...**

| Main author | Comorbidities besides LTM indication | LTM dose (mg) | LTM levels | Time from LTM start to symptoms  | Time from management to recovery   | Follow-up | Important CH and CM                                                                                                                                                                                                                                                                                                                                                                                                                                                                                                                                                                                                                                                                                                                                                                                                                                                                                                                      | Neurological symptoms and clinical examination                                | Neuroimaging - CT scan, brain MRI, and EEG |
|-------------|--------------------------------------|---------------|------------|----------------------------------|------------------------------------|-----------|------------------------------------------------------------------------------------------------------------------------------------------------------------------------------------------------------------------------------------------------------------------------------------------------------------------------------------------------------------------------------------------------------------------------------------------------------------------------------------------------------------------------------------------------------------------------------------------------------------------------------------------------------------------------------------------------------------------------------------------------------------------------------------------------------------------------------------------------------------------------------------------------------------------------------------------|-------------------------------------------------------------------------------|--------------------------------------------|
| Rosebush PI | ...                                  | ...           | ...        | 10 years                         | ...                                | ...       | <p>He had significant depressive symptoms, which remitted with fluoxetine 20 mg/day for 8 weeks. He subsequently developed a manic episode during which the DTN movements actually got better. Clozapine was started and adjusted at 250 mg/day, the maximum he could tolerate. Clonazepam was tapered off and VPA reduced to 400 mg/day. At discharge, 3 weeks later, he had no manic symptoms (MRS-1). DTN movements, pain, and discomfort had also reduced (AIMS-10)</p> <p>About 10 years after illness onset, he developed DTN (torticollis). DTN would disappear during the manic phase, only to reappear when the manic symptoms abated, with or without antipsychotic dose reduction. He has been given botulinum toxin (injectable), tetrabenazine, and trihexyphenidyl to control the DTN, without success. For the last 3 years, he has been treated with atypical antipsychotics. He is now receiving olanzapine and VPA</p> | DTN (torticollis) affecting the left sternocleidomastoid and platysma muscles | ...                                        |
| Silva MC    | ...                                  | 450 mg/day    | ...        | 1 day after decrease in LTM dose | 24 h after restitution of LTM dose | ...       | <p>5-year history of insidious onset of forgetfulness and personality change and 2-year history of an acute right-sided hemiparesis. At presentation, the patient had regressed behavior and double incontinence. A provisional diagnosis of dementia was made. Symptomatic treatment was started with haloperidol 7.5 mg/day. It had to be stopped as the patient developed PKN. The EPSSs remitted with a week of therapy with anticholinergics. LTM was started and showed modest improvement in arousal. After 4 weeks, an attempt was made to decrease LTM to a minimum effective dose, by decreasing it to 300 mg/day.</p>                                                                                                                                                                                                                                                                                                         | Left-sided truncal DTN                                                        | ...                                        |

Contd...

**Supplemental Table 2: Contd...**

| Main author | Comorbidities besides LTM indication | LTM dose (mg) | LTM levels | Time from LTM start to symptoms                                                                       | Time from management to recovery                                                                       | Follow-up | Important CH and CM                                                                                                                                                                                                                                                                                                                                                                                                                                                                                                                                                                                                                                                                                                                                                                                                                                                                                                                                                                                                                                  | Neurological symptoms and clinical examination | Neuroimaging - CT scan, brain MRI, and EEG |
|-------------|--------------------------------------|---------------|------------|-------------------------------------------------------------------------------------------------------|--------------------------------------------------------------------------------------------------------|-----------|------------------------------------------------------------------------------------------------------------------------------------------------------------------------------------------------------------------------------------------------------------------------------------------------------------------------------------------------------------------------------------------------------------------------------------------------------------------------------------------------------------------------------------------------------------------------------------------------------------------------------------------------------------------------------------------------------------------------------------------------------------------------------------------------------------------------------------------------------------------------------------------------------------------------------------------------------------------------------------------------------------------------------------------------------|------------------------------------------------|--------------------------------------------|
| Oommen E    | ...                                  | 450 mg/day    | ...        | 8 months of LTM start. 2 months after aripiprazole exposure, there was worsening in dystonic symptoms | ...                                                                                                    | ...       | Within a day of decrease, the patient developed left-sided truncal DTN. The DTN did not remit for 3 days despite injectable promethazine 50 mg/day and later oral promethazine 75 mg/day. LTM was resituated to 450 mg/day. Patient's DTN remitted within 24 h of these changes<br>The patient has a previous history of 2 psychotic episodes and 3 episodes of mania. LTM was reduced                                                                                                                                                                                                                                                                                                                                                                                                                                                                                                                                                                                                                                                               | Tardive DTN                                    | ...                                        |
| Kwan Y      | ...                                  | ...           | ...        | ...                                                                                                   | His tardive DTN gradually improved and resolved completely after 21 months of treatment with clozapine | CR        | He had the diagnosis of BD in 1996. He was initially treated with LTM and haloperidol. He had multiple relapses of mania, resulting in an increase in haloperidol up to 8 mg/day, after switched to risperidone 6 mg/day, after switched to quetiapine. The diagnosis of tardive DTN was made in May 2002. A trial of a lower potency antipsychotic thioridazine at 50 mg/day was started in May 2002, but it worsened his movement disorder. He was then switched to tetrabenazine with doses up to 75 mg/day for 6 months with minimal improvement. Then, he underwent 12 sessions of ECT during a manic episode in 2002. Clozapine was started in September 2002 in view of his multiple relapses of mania when treated with LTM or VPA alone. His mental state stabilized after 10 months, with clozapine up to 300 mg daily. His tardive DTN gradually improved and resolved completely after 21 months of treatment with clozapine. He remained symptom-free despite subsequent reduction of the clozapine to the current dose of 200 mg daily | Tardive DTN                                    | ...                                        |

Contd...

**Supplemental Table 2: Contd...**

| Main author  | Comorbidities besides LTM indication | LTM dose (mg) | LTM levels | Time from LTM start to symptoms     | Time from management to recovery   | Follow-up | Important CH and CM                                                                                                                                                                                                                                                                                                                                                                                                                                                                                                                                                                                                                                                                                                                                                                                                                                                                                                                                                                                                                                                                                                                                                                                                                                                                                                                             | Neurological symptoms and clinical examination     | Neuroimaging - CT scan, brain MRI, and EEG |
|--------------|--------------------------------------|---------------|------------|-------------------------------------|------------------------------------|-----------|-------------------------------------------------------------------------------------------------------------------------------------------------------------------------------------------------------------------------------------------------------------------------------------------------------------------------------------------------------------------------------------------------------------------------------------------------------------------------------------------------------------------------------------------------------------------------------------------------------------------------------------------------------------------------------------------------------------------------------------------------------------------------------------------------------------------------------------------------------------------------------------------------------------------------------------------------------------------------------------------------------------------------------------------------------------------------------------------------------------------------------------------------------------------------------------------------------------------------------------------------------------------------------------------------------------------------------------------------|----------------------------------------------------|--------------------------------------------|
| McIaren JL   | ...                                  | 600 mg/day    | ...        | 33 h after stopping methylphenidate | 30 min after diphenhydramine 50 mg | No        | On admission, the patient was taking aripiprazole at 30 mg/day, extended-release OROS methylphenidate 108 mg/day, LTM 900 mg/day, clonidine 0.4 mg/day. The patient had been treated with aripiprazole for 2 years and methylphenidate for 4 years; neither medication had been increased in the previous 6 months. On admission, we were concerned about the patient's high doses of multiple medications and wanted to simplify his medication regimen. The methylphenidate was discontinued; 33 h after the last dose of this medication, the patient developed an acute dystonic reaction. The patient complained of spasmodic muscular contractions of his jaw that was witnessed by nursing staff and the child psychiatrist. The patient was observed to have forceful jaw closure, contraction, and tension with difficulty opening his mouth. The patient disclosed that this adverse effect had occurred on one occasion previously when he had forgotten to take his extended-release OROS methylphenidate. IM diphenhydramine 50 mg was administered promptly, and within 30 min, the patient had complete resolution of the DTN with complete relaxation of the jaw and the ability to easily open his mouth, with no recurrence of DTN. Benztropine 2 mg/day was continued for the next 48 h to prevent another dystonic reaction | Acute DTN reaction associated with methylphenidate | ...                                        |
| Vandewalle W | ...                                  | ...           | ...        | ...                                 | ...                                | ...       | Study that assessed the movement disorders caused by different antidepressants. They reported one individual with DTN                                                                                                                                                                                                                                                                                                                                                                                                                                                                                                                                                                                                                                                                                                                                                                                                                                                                                                                                                                                                                                                                                                                                                                                                                           | ...                                                | ...                                        |

Contd...

**Supplemental Table 2: Contd...**

| Main author | Comorbidities besides LTM indication                                                                                                                                                                       | LTM dose (mg) | LTM levels | Time from LTM start to symptoms                                                   | Time from management to recovery                                                              | Follow-up                                                                | Important CH and CM                                                                                                                                                                                                                                                                                                                                                                                                                                                                                                                                                                                                                                                                                                                                 | Neurological symptoms and clinical examination                                                                                         | Neuroimaging - CT scan, brain MRI, and EEG |
|-------------|------------------------------------------------------------------------------------------------------------------------------------------------------------------------------------------------------------|---------------|------------|-----------------------------------------------------------------------------------|-----------------------------------------------------------------------------------------------|--------------------------------------------------------------------------|-----------------------------------------------------------------------------------------------------------------------------------------------------------------------------------------------------------------------------------------------------------------------------------------------------------------------------------------------------------------------------------------------------------------------------------------------------------------------------------------------------------------------------------------------------------------------------------------------------------------------------------------------------------------------------------------------------------------------------------------------------|----------------------------------------------------------------------------------------------------------------------------------------|--------------------------------------------|
| Chandar P   | In the ICU he was also noted to have central sleep apnea and clinical characteristics suspicious of acromegaly (tall stature, thick tongue and extremities) that was confirmed by endocrinological testing | ...           | ...        | ...                                                                               | ...                                                                                           | ...                                                                      | Came to the ER with complaints of progressive dyspnea, hoarseness of voice, increased salivation, and swelling of his lips progressing over 2 weeks. Laryngoscopy revealed mild edema of the vocal cords but no signs of airway compromise. He was admitted to the ICU for close monitoring and started on a regimen of IV steroids, antihistamines and diphenhydramine. A detailed interview revealed the patient taking risperidone and LTM for DPS. After consultation with neurology and psychiatry, and extensive literature review, his angioedema was attributed to LTM and it was stopped. His symptoms gradually improved over few days despite continued use of risperidone and his dystonic movements improved after starting amantadine | On examination, he was noted to have facial dystonic movements, swollen tongue and lips, profound dysarthria, and stable vital signs   | ...                                        |
| Engel A     | ...                                                                                                                                                                                                        | 900 mg/day    | ...        | 3 days                                                                            | ...                                                                                           | Recurrence of dysarthria on day 54 <sup>th</sup> after LTM was restarted | Long history of schizoaffective disorder, who was treated for many years with ziprasidone and VPA and was admitted with SAD exacerbation. Due to increased QT interval, the medication was switched to lurasidone. After 2 weeks, due to increased ammonia level, VPA was switched to LTM 900 mg/day                                                                                                                                                                                                                                                                                                                                                                                                                                                | Intermittent episodes of acute DTN, manifested as mutism, dysarthria, upper and lower extremity muscle rigidity, dysphagia, and tremor | ...                                        |
| Huang SY    | ...                                                                                                                                                                                                        | 900 mg/day    | 0.61 mEq/L | The symptoms started appear after 2 weeks switching from quetiapine to clotiapine | On returning to quetiapine and stopping clotiapine, the symptoms of DTN ceased within 10 days | ...                                                                      | She was admitted due to manic symptoms after discontinuation of all medications (VPA 1500 mg/day, long-term quetiapine 600 mg/day). To improve the Pisa syndrome, clotiapine was reverted to quetiapine 600 mg/day                                                                                                                                                                                                                                                                                                                                                                                                                                                                                                                                  | Lateral truncal DTN                                                                                                                    | Cranial CT scan was normal                 |

Contd...

**Supplemental Table 2: Contd...**

| Main author | Comorbidities besides LTM indication | LTM dose (mg) | LTM levels | Time from LTM start to symptoms | Time from management to recovery                                                                                      | Follow-up | Important CH and CM                                                                                                                                                                                                                                                                                                                                                                                                                                                                                                                     | Neurological symptoms and clinical examination                                                                                                                                                                                                                                                                                                                                                                                                                          | Neuroimaging - CT scan, brain MRI, and EEG                                                                 |
|-------------|--------------------------------------|---------------|------------|---------------------------------|-----------------------------------------------------------------------------------------------------------------------|-----------|-----------------------------------------------------------------------------------------------------------------------------------------------------------------------------------------------------------------------------------------------------------------------------------------------------------------------------------------------------------------------------------------------------------------------------------------------------------------------------------------------------------------------------------------|-------------------------------------------------------------------------------------------------------------------------------------------------------------------------------------------------------------------------------------------------------------------------------------------------------------------------------------------------------------------------------------------------------------------------------------------------------------------------|------------------------------------------------------------------------------------------------------------|
| Aggarwal R  | Hypothyroidism                       | 800 mg        | ...        | 25 years                        | The patient had some improvement with withdrawal of LTM and the addition of the anticholinergic agent trihexyphenidyl | ...       | The patient has been treated with LTM for 25 years and has developed hypothyroidism for 10 years and uses levothyroxine ever since                                                                                                                                                                                                                                                                                                                                                                                                      | Lingual DTN. His neurological examination disclosed repetitive involuntary movements of the tongue which exacerbated on speaking and on eating. There were no associated involuntary movements of the masticatory or oral muscles. Mini-mental state examination and detailed lobar assessment were normal. Motor and sensory examination was within normal limits. There were no features of PKN. Other neurological and systemic physical examination was also normal | Brain MRI showed multiple lacunar infarcts in subcortical white matter in bilateral frontoparietal regions |
| Yildiz MÇ   | ...                                  | 1200 mg/day   | ...        | ...                             | ...                                                                                                                   | ...       | His psychiatric treatment includes VPA 1250 mg/day LTM 1200 mg/day biperidene 4 mg/day propranolol 60 mg/day and quetiapine 600 mg/day. VPA, biperiden, propranolol, quetiapine was reduced and stopped. Clozapine 25 mg/day ordered and titrated up to 400 mg/day. When the patient used LTM 1200 mg/day and clozapine 400 mg/day, he had urinary tract infections. Because of this ciprofloxacin 1000 mg/day was ordered. 3 days later he presented with DTN and because of drug interaction ciprofloxacin was stopped and DTN healed | EPS symptoms                                                                                                                                                                                                                                                                                                                                                                                                                                                            | ...                                                                                                        |

Contd...

**Supplemental Table 2: Contd...**

| Main author | Comorbidities besides LTM indication | LTM dose (mg) | LTM levels | Time from LTM start to symptoms                                                             | Time from management to recovery | Follow-up         | Important CH and CM                                                                                                                                                                                                                                                                                                                                                                                                                                                                                   | Neurological symptoms and clinical examination                                                                                                                                                                                                                                                                                                                                                                                                                                           | Neuroimaging - CT scan, brain MRI, and EEG                                                         |
|-------------|--------------------------------------|---------------|------------|---------------------------------------------------------------------------------------------|----------------------------------|-------------------|-------------------------------------------------------------------------------------------------------------------------------------------------------------------------------------------------------------------------------------------------------------------------------------------------------------------------------------------------------------------------------------------------------------------------------------------------------------------------------------------------------|------------------------------------------------------------------------------------------------------------------------------------------------------------------------------------------------------------------------------------------------------------------------------------------------------------------------------------------------------------------------------------------------------------------------------------------------------------------------------------------|----------------------------------------------------------------------------------------------------|
| Pikard JL   | ...                                  | 900 mg/day    | ...        | Symptoms started before LTM was introduced, and recurred 41 days after LTM was rechallenged | ...                              | ...               | The present case is characterized by BD compounded by an anoxic brain injury (after suicide attempt) and sensitivity to antipsychotics and LTM. Approximately 64 days after receiving IM aripiprazole and 41 days after starting LTM, the patient developed another acute dystonic reaction, and all medications were discontinued. Other medications: Sertraline, aripiprazole 400 mg IM, benzotropine, vortioxetine, quetiapine, clonazepam, oxazepam, temazepam, nozinan, zopiclone, and lorazepam | After suicide attempt, he was admitted to the ICU with a Glasgow coma score of 3. Once discharged, he was noted to be dystonic on transfer with several movement concerns. He described muscle contracture in his arms which kept them angled at 90° and a consistent need to walk around the unit due to restlessness. He displayed repetitive movements of the arms and hands and reported stiffness in his neck and back. At times, the movements of his hands would display a tremor | EEG showed an abnormality possibly associated with anoxic brain injury. Brain MRI was unremarkable |
| Chaudhari P | ...                                  | 800 mg/day    | 1.7 mEq/L  | 8 days                                                                                      | 8 days                           | Complete recovery | LTM was discontinued. LTM changed to VPA                                                                                                                                                                                                                                                                                                                                                                                                                                                              | She developed complaints of grinding of the teeth, throughout the day which would stop only when she would be asleep                                                                                                                                                                                                                                                                                                                                                                     | ...                                                                                                |
| Hsieh H     | Alzheimer disease                    | 600 mg/day    | ...        | 1 week after LTM dose increase. 6 years of LTM use                                          | 5 days                           | Complete recovery | LTM dose was increased, and the truncal DTN worsened. After LTM dose reduction, the symptoms ameliorate                                                                                                                                                                                                                                                                                                                                                                                               | Truncal DTN on the left side with a 20° deviation from the midline while standing or sitting                                                                                                                                                                                                                                                                                                                                                                                             | ...                                                                                                |
| Kumar A     | ...                                  | 750 mg/day    | 0.49 mEq/L | 3 weeks after dose increase. 7 years of LTM use                                             | 4 weeks                          | Complete recovery | LTM changed to VPA with symptoms recovery. The DTN improved with the LTM dose decrease                                                                                                                                                                                                                                                                                                                                                                                                                | Spasmodic opening and closing movements of the eyes                                                                                                                                                                                                                                                                                                                                                                                                                                      | Brain MRI was normal                                                                               |

Contd...



**Supplemental Table 2: Contd...**

| Main author                | Comorbidities besides LTM indication                    | LTM dose (mg) | LTM levels | Time from LTM start to symptoms | Time from management to recovery | Follow-up                                                  | Important CH and CM                                                                                                                                                          | Neurological symptoms and clinical examination                                                                                                                                                                                                                                                                                                        | Neuroimaging - CT scan, brain MRI, and EEG                                                                                         |
|----------------------------|---------------------------------------------------------|---------------|------------|---------------------------------|----------------------------------|------------------------------------------------------------|------------------------------------------------------------------------------------------------------------------------------------------------------------------------------|-------------------------------------------------------------------------------------------------------------------------------------------------------------------------------------------------------------------------------------------------------------------------------------------------------------------------------------------------------|------------------------------------------------------------------------------------------------------------------------------------|
| Kerbeshian J               | Attention-deficit/hyperactivity disorder                | ...           | 1.0 mEq/L  | ...                             | ...                              | ...                                                        | The 5 LTM nonresponders exhibited either no change in tics or a slight worsening in tics                                                                                     | ...                                                                                                                                                                                                                                                                                                                                                   | ...                                                                                                                                |
| Potter PO                  | Attention-deficit/hyperactivity disorder, mood symptoms | 300 mg/day    | 0.10 mEq/L | 2 months                        | ...                              | ...                                                        | The spasm attacks occurred with guanfacine + LTM. When guanfacine was stopped and LTM was increased with risperidone and lisdexamfetamine was started, the patient recovered | Worsening of attention-deficit hyperactivity disorder symptoms                                                                                                                                                                                                                                                                                        | ...                                                                                                                                |
| <b>Cerebellar syndrome</b> |                                                         |               |            |                                 |                                  |                                                            |                                                                                                                                                                              |                                                                                                                                                                                                                                                                                                                                                       |                                                                                                                                    |
| Nagaraja D                 | ...                                                     | 1350 mg/day   | 0.9 mEq/L  | 8 months                        | ...                              | ...                                                        | Precipitating factors: Fever, dehydration. Sequelae: Cerebellar, pyramidal                                                                                                   | Ataxia, dysarthria, confusion                                                                                                                                                                                                                                                                                                                         | Cranial CT scan showed cerebellar atrophy                                                                                          |
|                            | ...                                                     | 1650 mg/day   | 0.4 mEq/L  | 3-175 months                    | ...                              | ...                                                        | Precipitating factors: Fever, chlorpromazine. Sequelae: Cerebellar, pyramidal                                                                                                | Ataxia, confusion                                                                                                                                                                                                                                                                                                                                     | Cranial CT scan was normal                                                                                                         |
|                            | ...                                                     | 900 mg/day    | 0.7 mEq/L  | 3 months                        | ...                              | ...                                                        | Sequelae: Ataxia                                                                                                                                                             | Ataxia, dysarthria                                                                                                                                                                                                                                                                                                                                    | Cranial CT scan showed cerebellar and cerebellar atrophy                                                                           |
| Tesio L                    | ...                                                     | 24 g/1x       | 3.7 mEq/L  | 24 h                            | 8 months                         | 2 years after poisoning the clinical picture was unchanged | He ingested with 24 g of lithium 5 L of beer and 20 mg of benzodiazepine in a suicide attempt                                                                                | Cerebellar atrophy, coma, hyperthermia, neck stiffness, tetraplegia, incontinence, massive hematuria, and respiratory failure. There were generalized weakness incoordination, horizontal bilateral nystagmus, double vision on upward gaze, dysarthria with slurred and scanning speech, but neither sensory deficits nor abnormal plantar responses | Cranial CT scan showed enlargement of the 4 <sup>th</sup> ventricle, indicating cerebellar atrophy, after 45 days of LTM poisoning |

Contd...

**Supplemental Table 2: Contd...**

| Main author | Comorbidities besides LTM indication | LTM dose (mg) | LTM levels | Time from LTM start to symptoms | Time from management to recovery | Follow-up                                                                                                                                                                                                                                                  | Important CH and CM                                                                                                                                                                                                                                                                                                                                                                                                                                                                                                                                                                                                                                                                                                     | Neurological symptoms and clinical examination                                                                                                                                                                                                                                            | Neuroimaging - CT scan, brain MRI, and EEG                                                                                                                                                                                                                                                                                                                   |
|-------------|--------------------------------------|---------------|------------|---------------------------------|----------------------------------|------------------------------------------------------------------------------------------------------------------------------------------------------------------------------------------------------------------------------------------------------------|-------------------------------------------------------------------------------------------------------------------------------------------------------------------------------------------------------------------------------------------------------------------------------------------------------------------------------------------------------------------------------------------------------------------------------------------------------------------------------------------------------------------------------------------------------------------------------------------------------------------------------------------------------------------------------------------------------------------------|-------------------------------------------------------------------------------------------------------------------------------------------------------------------------------------------------------------------------------------------------------------------------------------------|--------------------------------------------------------------------------------------------------------------------------------------------------------------------------------------------------------------------------------------------------------------------------------------------------------------------------------------------------------------|
| Yoshimoto Y | ...                                  | 1.800 mg/day  | ...        | 7 days                          | 3 months                         | On August 16, the symptoms were almost completely stabilized, although irreversible neurological symptoms such as truncal ataxia and vertical downbeat nystagmus remained as sequelae. On August 18, he visited the ENT outpatient clinic for consultation | On June 18, twisting of muscle fiber bundles, muscular rigidity, and fever were observed. At this point, the case was diagnosed as LTM intoxication, and the medication was discontinued. From June 19, IV drip infusion (5% glucose containing Vitamin B) was initiated. On June 22, the symptoms became severe and the patient lapsed into a coma. MCL-like involuntary movement and muscular rigidity were observed. On June 23 and 24, hemodialysis was performed with a favorable response in terms of restoring consciousness, and improvement in involuntary movement and muscular rigidity. During this period, vertical nystagmus and cerebellar syndrome were noted. On July 16, the patient was able to walk | Truncal ATX on standing or walking and ATX of the arms were observed. Marked downbeat vertical nystagmus. There were no pyramidal or EPS, superficial sensory disturbance, or cranial nerve signs. Psychotic symptoms were stabilized and there was no recurrence of manic manifestations | ...                                                                                                                                                                                                                                                                                                                                                          |
| Shopsin B   | ...                                  | 1500 mg/day   | 0.48 mEq/L | ...                             | ...                              | Others not clearly defined - EPSS without clearly stating other of the above, or unclear relation to lithium                                                                                                                                               | ...                                                                                                                                                                                                                                                                                                                                                                                                                                                                                                                                                                                                                                                                                                                     | Motor stereotypies, confusion, perplexity, memory deficits, disorientation, irrelevant speech, incessant rambling. Urinary incontinence                                                                                                                                                   | ...                                                                                                                                                                                                                                                                                                                                                          |
|             | ...                                  | 1500 mg/day   | 0.9 mEq/L  | 3 days                          | 14 days                          | LTM was terminated on the 7 <sup>th</sup> day, and chlpromazine was started and in 14 days returned to near predrug condition                                                                                                                              | ...                                                                                                                                                                                                                                                                                                                                                                                                                                                                                                                                                                                                                                                                                                                     | Grimacing, posturing, EEG with bilateral motor stereotypies. Y oga and womb-like positions were noted on several occasions along with body stiffening                                                                                                                                     | EEG with bilateral synchronized bursts of 3-4 cps, atypical spiking, and slow-wave discharges with a suggestive left-sided origin. 3 days after LTM discharge another EEG failed to show paroxysmal activity, abnormal tracing and excess of slower frequencies persisted. Skull X-ray, brain scan, and lumbar puncture examinations showed no abnormalities |

Contd...

**Supplemental Table 2: Contd...**

| Main author            | Comorbidities besides LTM indication             | LTM dose (mg)               | LTM levels                | Time from LTM start to symptoms                                                                          | Time from management to recovery | Follow-up                                                                                                                                                                                                                                                                                                                                                                                                                               | Important CH and CM | Neurological symptoms and clinical examination                                                                                                                                                                                                                         | Neuroimaging - CT scan, brain MRI, and EEG |
|------------------------|--------------------------------------------------|-----------------------------|---------------------------|----------------------------------------------------------------------------------------------------------|----------------------------------|-----------------------------------------------------------------------------------------------------------------------------------------------------------------------------------------------------------------------------------------------------------------------------------------------------------------------------------------------------------------------------------------------------------------------------------------|---------------------|------------------------------------------------------------------------------------------------------------------------------------------------------------------------------------------------------------------------------------------------------------------------|--------------------------------------------|
| McCaul JA              | Reduce dyskinesias caused by Parkinson's disease | 250 mg/day                  | ...                       | ...                                                                                                      | ...                              | ...                                                                                                                                                                                                                                                                                                                                                                                                                                     | ...                 | LTM in modifying the manifestations of Parkinson's disease and diminishing levodopa-induced DKN. Single-blind pilot trial. The results showed that LTM could alleviate painful muscle spasms and cramps, but does not is helpful in the management of PKN disabilities | ...                                        |
| Gabriel E<br>Johnels B | ...                                              | ...                         | 2.0 mEq/L                 | 9 years                                                                                                  | 2 weeks                          | Subsequently, she has remained well and completely free from EPSs on a maintenance dosage of LTM lower than the previous one                                                                                                                                                                                                                                                                                                            | ...                 | Rigidity, stiffness of the neck musculature, dysarthria, cogwheel rigidity, hypokinesia with slight tremor. Dysphagia, anxiety, insomnia                                                                                                                               | ...                                        |
|                        | 2 weeks                                          | ...                         | 1.9 mEq/L                 | 7 years                                                                                                  | 2 weeks                          | Admitted with diarrhea and lassitude. Haloperidol 2-3 mg daily and LTM were discontinued on the day of admission. Other medications: Neuroleptics and tricyclic for periods                                                                                                                                                                                                                                                             | ...                 | Rigidity of cogwheel type in the neck and arms, forward-leaning gait, short steps without related movement. Impairment of alertness, slurred speech, and unsteady gait, diarrhea                                                                                       | ...                                        |
| Kane J                 | ...                                              | 900-2700 mg/day (mean 1300) | 0.5-1.3 mEq/L (mean 0.79) | Patients used LTM from 3 months to 5 years before evaluation. Mean duration of LTM treatment=15.6 months | ...                              | 2 patients had cogwheel rigidity, 17 had fine and rapid tremor, of moderate severity. 1 patient had several abnormal ratings - gait: +1; arm dropping, +3; elbow rigidity, +2; wrist rigidity; tremor, +3; and AKT, +1, this patient had normal pressure hydrocephalus 6 other patients received ratings of 1 on the following items - AKT (n=2), spontaneity of speech (n=1), wrist rigidity (n=1), arm dropping (n=1), and gait (n=1) | ...                 | Gait, arm dropping, elbow rigidity, wrist rigidity                                                                                                                                                                                                                     | ...                                        |

Contd...

**Supplemental Table 2: Contd...**

| Main author | Comorbidities besides LTM indication | LTM dose (mg) | LTM levels    | Time from LTM start to symptoms | Time from management to recovery | Follow-up | Important CH and CM                                                                                                                                                                                                                                                                                                                                                                                                                                                                                                                                                                                                                     | Neurological symptoms and clinical examination                                                                                                                                                                                                                                                                                                                                                                                                                | Neuroimaging - CT scan, brain MRI, and EEG |
|-------------|--------------------------------------|---------------|---------------|---------------------------------|----------------------------------|-----------|-----------------------------------------------------------------------------------------------------------------------------------------------------------------------------------------------------------------------------------------------------------------------------------------------------------------------------------------------------------------------------------------------------------------------------------------------------------------------------------------------------------------------------------------------------------------------------------------------------------------------------------------|---------------------------------------------------------------------------------------------------------------------------------------------------------------------------------------------------------------------------------------------------------------------------------------------------------------------------------------------------------------------------------------------------------------------------------------------------------------|--------------------------------------------|
| Bone S      | ...                                  | ...           | 0.5-1.5 mEq/L | ...                             | ...                              | ...       | Of the 90 euthymic patients, 18% of those on LTM alone and 41% of those on LTM and other psychotropic medications complained of having at least 1 side effect that was moderately severe or worse. Of the 37 dysphoric patients, 38% on LTM alone and 46% on lithium and other psychotropic medications complained of having at least 1 side effect that was moderately severe or worse. Other medications: Of the 44 patients who were also receiving tricyclic antidepressants, 33 were taking tricyclic antidepressants. Of the 11 remaining patients, 9 were taking antipsychotic medications and 3 were taking minor tranquilizers | Hand tremor, incoordination, muscle weakness. Dry mouth and constipation, the effect of psychotropic medication was significant for patients who were euthymic. For dysphoric patients, the effect of psychotropic medications in increasing perception of side effects was significant only for dry mouth. The effect of mood for patients on lithium alone was significant for lightheadedness, dazed feeling, constipation, abdominal pain, and drowsiness | ...                                        |
| Miller F    | ...                                  | 900 mg/day    | 0.98 mEq/L    | ...                             | 10 days                          | ...       | ...                                                                                                                                                                                                                                                                                                                                                                                                                                                                                                                                                                                                                                     | Delirium, disorientation, ... episodically incoherent, disturbed sleep-wakefulness cycles, and fluctuating levels of consciousness                                                                                                                                                                                                                                                                                                                            | ...                                        |
|             | ...                                  | 1500 mg/day   | 1.84 mEq/L    | ...                             | 10 days                          | ...       | ...                                                                                                                                                                                                                                                                                                                                                                                                                                                                                                                                                                                                                                     | Delirium, disorientation, episodically incoherent, disturbed sleep-wakefulness cycles, and fluctuating levels of consciousness                                                                                                                                                                                                                                                                                                                                | ...                                        |
|             | ...                                  | 900 mg/day    | 1.08 mEq/L    | ...                             | 10 days                          | ...       | ...                                                                                                                                                                                                                                                                                                                                                                                                                                                                                                                                                                                                                                     | Delirium, disorientation, ... episodically incoherent, disturbed sleep-wakefulness cycles, and fluctuating levels of consciousness                                                                                                                                                                                                                                                                                                                            | ...                                        |

Contd...

**Supplemental Table 2: Contd...**

| Main author   | Comorbidities besides LTM indication | LTM dose (mg)           | LTM levels                  | Time from LTM start to symptoms | Time from management to recovery | Follow-up                                                                                                                                                                                  | Important CH and CM                                                                                                                                                                                                                                                                                                                                                                                                                           | Neurological symptoms and clinical examination                                                                                                                                                                                                                                     | Neuroimaging - CT scan, brain MRI, and EEG |
|---------------|--------------------------------------|-------------------------|-----------------------------|---------------------------------|----------------------------------|--------------------------------------------------------------------------------------------------------------------------------------------------------------------------------------------|-----------------------------------------------------------------------------------------------------------------------------------------------------------------------------------------------------------------------------------------------------------------------------------------------------------------------------------------------------------------------------------------------------------------------------------------------|------------------------------------------------------------------------------------------------------------------------------------------------------------------------------------------------------------------------------------------------------------------------------------|--------------------------------------------|
| Sachdev PS    |                                      | 750 mg/day              | 1.0 mEq/L                   | 6 days                          | 5 days                           | Stoppage of benzotropine after 1 week produced immediate recurrence of mild rigidity and tremor, necessitating resumption of the drug. Benzotropine was successfully tapered 8 weeks later | Patient already in use of fluphenazine decanoate 25 mg/week and benzotropine mesylate 4 mg/day. Symptoms started after LTM was introduced. The extrapyramidal side effects responded to benzotropine, 2 mg IV and not to normal saline in a blind trial administration. LTM was stopped and treatment with oral benzotropine 6 mg/day was started. Other medications: Fluphenazine decanoate, 25 mg/week, and benzotropine mesylate, 4 mg/day | Mild rigidity, cogwheel rigidity, akinesia, and coarse tremor of her upper limbs. A score of 3.8 on the Simpson and Angus Scale, and almost complete immobility                                                                                                                    | EEG was normal                             |
| Miller F      | ...                                  | 1047 mg (SD=567) (mean) | 1.23 mEq/L (SD=0.27) (mean) | ...                             | ...                              | ...                                                                                                                                                                                        | ...                                                                                                                                                                                                                                                                                                                                                                                                                                           | Delirium, disorientation, incoherence, disturbed sleep-wakefulness cycle, fluctuating levels of consciousness. EPSS were present in all cases with 5 (83%) manifesting tremor, 5 (83%) rigidity, 3 (50%) AKT, and 2 (33%) ataxia                                                   | ...                                        |
| Morgenstern H | ...                                  | ...                     | ...                         | ...                             | ...                              | ...                                                                                                                                                                                        | ...                                                                                                                                                                                                                                                                                                                                                                                                                                           | A cross-sectional study was conducted to identify predictors of TD in a group of 180 psychiatric outpatients, 12 were in use of LTM. They observed no other interaction effects between pairs of predictor variables, nor did they find significant independent effects of LTM use | ...                                        |

Contd...

**Supplemental Table 2: Contd...**

| Main author                   | Comorbidities besides LTM indication | LTM dose (mg) | LTM levels      | Time from LTM start to symptoms                                                                      | Time from management to recovery | Follow-up                                                                                                                                                                                                        | Important CH and CM | Neurological symptoms and clinical examination                                                                                                                                                                         | Neuroimaging - CT scan, brain MRI, and EEG                                      |
|-------------------------------|--------------------------------------|---------------|-----------------|------------------------------------------------------------------------------------------------------|----------------------------------|------------------------------------------------------------------------------------------------------------------------------------------------------------------------------------------------------------------|---------------------|------------------------------------------------------------------------------------------------------------------------------------------------------------------------------------------------------------------------|---------------------------------------------------------------------------------|
| Addonisio G                   | ...                                  | ...           | 0.65-1.27 mEq/L | Evaluation at day 3, 6, 9, and 12                                                                    | ...                              | ...                                                                                                                                                                                                              | ...                 | Gait, shoulder shaking, elbow rigidity, and tremor increased significantly. Wrist rigidity, glabellar tap, cogwheel rigidity, masked facies, and subjective perception of stiffness increased in nonsignificant degree | ...                                                                             |
| Nasrallah HA<br>Waddington JL | ...                                  | ...           | ...             | ...                                                                                                  | ...                              | ...                                                                                                                                                                                                              | ...                 | The prognostic factors found in the study to develop an abnormal movement were poorer cognitive function, had fewer major depressive episodes, and had received briefer exposure to LTM                                | ...                                                                             |
| Axelsson R<br>Moskowitz AS    | Stroke                               | 1200 mg/day   | ...             | Unclear (several instances of LTM introduction and cessation, with a background sequelae from stroke | ...                              | After 6 years of treatment with LTM, he had a stroke and after that the symptoms started                                                                                                                         | ...                 | Dysarthria, left upper and lower extremity hemiparesis, pseudobulbar palsy (after stroke)                                                                                                                              | Infarction of the posterior limb of the right interior capsule, evidenced by CT |
| Kohler J                      | ...                                  | ...           | ...             | ...                                                                                                  | ...                              | Neurological complications associated with Q-fever - A synergistic neurotoxic effect of <i>Coccidia burnetii</i> infection and LTM is discussed as a possible cause of the severe cerebellar pattern of symptoms | ...                 | ...                                                                                                                                                                                                                    | ...                                                                             |

Contd...

**Supplemental Table 2: Contd...**

| Main author          | Comorbidities besides LTM indication | LTM dose (mg) | LTM levels | Time from LTM start to symptoms | Time from management to recovery | Follow-up | Important CH and CM                                                                                                                                                                                                                                                                                                                                                                                                                                                                                                                   | Neurological symptoms and clinical examination                                                                                                                                                                                         | Neuroimaging - CT scan, brain MRI, and EEG |
|----------------------|--------------------------------------|---------------|------------|---------------------------------|----------------------------------|-----------|---------------------------------------------------------------------------------------------------------------------------------------------------------------------------------------------------------------------------------------------------------------------------------------------------------------------------------------------------------------------------------------------------------------------------------------------------------------------------------------------------------------------------------------|----------------------------------------------------------------------------------------------------------------------------------------------------------------------------------------------------------------------------------------|--------------------------------------------|
| Holroyd S<br>Arya DK | Pneumonia                            | 500 mg/day    | 0.9 mEq/L  | 1 year                          | 4 days after discontinuation     | ...       | Started on LTM in 1977, which was continued until 1987 when she developed fine tremors. Considered to be LTM-induced. LTM was discontinued. However, after 6 months, she had another manic episode and LTM 500 mg/day was restarted. Over the past 7 years, she remained on LTM 500 mg/day (serum lithium levels 0.5-0.6 mmol/l), trifluoperazine 4 mg/day, procyclidine 5 mg/day, and temazepam 20 mg/day. Except in 1990 when for 6 months, amoxapine was added to this treatment regimen for the treatment of a depressive episode | Tremors, rigidity in jaw and all limbs, slurring of speech, and flexed posture. On another trial - marked confusion, ataxia, postural instability, flexed posture, incoordination and EPSs (tremors, jaw stiffness and slurred speech) | ...                                        |
| Ghardirian AM        | ...                                  | ...           | ...        | ...                             | ...                              | ...       | The prevalence of tremor was 20.8%; hypokinetic PKN, 7.7%; AKT, 4.6%; DTN, 3.8%; and TD, 9.2%. Tremor was associated with LTM and neuroleptic intake; hypokinesia was associated with neuroleptic treatment and age; and TD was associated with neuroleptic, LTM, and tricyclic intake and age. Seven of 51 patients taking lithium but without a history of neuroleptic treatment during the previous 6 months presented symptoms of TD                                                                                              | ...                                                                                                                                                                                                                                    |                                            |

Contd...

**Supplemental Table 2: Contd...**

| Main author          | Comorbidities besides LTM indication | LTM dose (mg) | LTM levels | Time from LTM start to symptoms | Time from management to recovery    | Follow-up                                                                                                                                                             | Important CH and CM                                                                                                                                                                                                                                                                                                                                                                                                                                                                                                                                                                                                                                                                                                                                                                                                                                                                                                                                                                                                                                       | Neurological symptoms and clinical examination                                                                                                                                                                                                                                                                                                                                                                                                                                                                                                                                                     | Neuroimaging - CT scan, brain MRI, and EEG                                                                                                                                                                                            |
|----------------------|--------------------------------------|---------------|------------|---------------------------------|-------------------------------------|-----------------------------------------------------------------------------------------------------------------------------------------------------------------------|-----------------------------------------------------------------------------------------------------------------------------------------------------------------------------------------------------------------------------------------------------------------------------------------------------------------------------------------------------------------------------------------------------------------------------------------------------------------------------------------------------------------------------------------------------------------------------------------------------------------------------------------------------------------------------------------------------------------------------------------------------------------------------------------------------------------------------------------------------------------------------------------------------------------------------------------------------------------------------------------------------------------------------------------------------------|----------------------------------------------------------------------------------------------------------------------------------------------------------------------------------------------------------------------------------------------------------------------------------------------------------------------------------------------------------------------------------------------------------------------------------------------------------------------------------------------------------------------------------------------------------------------------------------------------|---------------------------------------------------------------------------------------------------------------------------------------------------------------------------------------------------------------------------------------|
| Tuglu C              | ...                                  | 900 mg/day    | 3 mm/L     | 7 years                         | 5 days (except perioral dyskinesia) | Examination 3 months later revealed that her mood was euthymic with appropriate affect. There was no evidence of hallucinations or delusions, but perioral dyskinesia | At admission, she was receiving 900 mg/day LTM and 5 mg/day olanzapine. All of the drugs she used were discontinued. Deterioration in her mental status last year after addition of a typical antipsychotic to her therapy to lessen her abrupt insomnia. She presented signs and symptoms of lethargy, confusion, and hyperprexia 10 days after initiation of chlorpromazine 200 mg/day. The discontinuation of all drugs resulted in complete remission within 72 h. Later, LTM therapy was re-initiated without recurrence of any mentioned clinical symptoms. After she did not receive any other concomitant drugs till 3 weeks before admission, when a physician prescribed olanzapine 5 mg/day due to her increased suspiciousness toward her neighbors and possible appearance of auditory hallucinations. At the current admission, carbamazepine was started to prevent the recurrence of bipolar disorder. The patient showed a rapid and dramatic recovery. At discharge, she was completely orientated with no further thought disturbances | Alteration in mental status, psychomotor slowness, difficulty in walking, and tremor in limbs. In her mental status examination, the patient's response to simple verbal commands was well, but disorientation to place and time was prominent. She also had loosened associations and rhyming. The neurological examination showed clear upward gaze palsy without a supranuclear component, severe bradykinesia, severe rigidity of the forelimbs with positive cogwheel, and rest and postural tremor with mild amplitude and frequency of 4-5 Hz in all limbs, predominantly on the right side | Cranial computed tomography did not reveal any pathology, except age-related cortical atrophy. The cranial MRI of our patient revealed multiple microlacunar infarcts which were not congruent with the level of the clinical picture |
| Brandt-Christensen M | ...                                  | ...           | ...        | ...                             | ...                                 | ...                                                                                                                                                                   | ...                                                                                                                                                                                                                                                                                                                                                                                                                                                                                                                                                                                                                                                                                                                                                                                                                                                                                                                                                                                                                                                       | Study that assessed the use of LTM in corticobasal degeneration and supranuclear gaze palsy. The results were that LTM can aggravate these two disorders. The adverse events reported were tremor (59%), gait disturbance (35%), and hypokinesia (24%)                                                                                                                                                                                                                                                                                                                                             | ...                                                                                                                                                                                                                                   |
| Galpern WR           | ...                                  | ...           | ...        | ...                             | ...                                 | ...                                                                                                                                                                   | ...                                                                                                                                                                                                                                                                                                                                                                                                                                                                                                                                                                                                                                                                                                                                                                                                                                                                                                                                                                                                                                                       | ...                                                                                                                                                                                                                                                                                                                                                                                                                                                                                                                                                                                                | ...                                                                                                                                                                                                                                   |

Contd...



**Supplemental Table 2: Contd...**

| Main author  | Comorbidities besides LTM indication | LTM dose (mg) | LTM levels | Time from LTM start to symptoms | Time from management to recovery | Follow-up | Important CH and CM | Neurological symptoms and clinical examination                                                                                                                                                                                                                                                                 | Neuroimaging - CT scan, brain MRI, and EEG |
|--------------|--------------------------------------|---------------|------------|---------------------------------|----------------------------------|-----------|---------------------|----------------------------------------------------------------------------------------------------------------------------------------------------------------------------------------------------------------------------------------------------------------------------------------------------------------|--------------------------------------------|
| Lyell VR     | ...                                  | ...           | ...        | ...                             | ...                              | ...       | ...                 | Study that assessed the individuals diagnosed with drug-induced PKN in a clinic and their taking medications. 328 individuals were assessed, 3 were taking LTM. They concluded that only a minority of new referrals from primary care to specialist are being prescribed drugs implicated in drug-induced PKN | ...                                        |
| Guilian M    | ...                                  | ...           | ...        | ...                             | ...                              | ...       | ...                 | ...                                                                                                                                                                                                                                                                                                            | ...                                        |
| Vandewalle W | ...                                  | ...           | ...        | ...                             | ...                              | ...       | ...                 | Assessment of that there is an increased incidence of anti-Parkinson drug prescribing following LTM treatment.                                                                                                                                                                                                 | ...                                        |
| Marras C     | ...                                  | ...           | ...        | ...                             | ...                              | ...       | ...                 | The results showed that LTM monotherapy was associated with an increased incidence of dopaminergic drug use (adjusted HR: 1.87, 95% CI: 1.06-3.30) and an increased incidence of anti-Parkinson drug                                                                                                           | ...                                        |

Contd...

**Supplemental Table 2: Contd...**

| Main author   | Comorbidities besides LTM indication | LTM dose (mg) | LTM levels | Time from LTM start to symptoms | Time from management to recovery | Follow-up | Important CH and CM | Neurological symptoms and clinical examination                                                                                                           | Neuroimaging - CT scan, brain MRI, and EEG |
|---------------|--------------------------------------|---------------|------------|---------------------------------|----------------------------------|-----------|---------------------|----------------------------------------------------------------------------------------------------------------------------------------------------------|--------------------------------------------|
| Rey et al.    | ...                                  | ...           | ...        | ...                             | ...                              | ...       | ...                 | ...                                                                                                                                                      | ...                                        |
| Thi Truong BE | ...                                  | ...           | ...        | ...                             | ...                              | ...       | ...                 | Population-based cohort study, in which 7 individuals using LTM had RLS symptoms. LTM increased the incidence of RLS to near 75.0 per 10,000 person-year | ...                                        |

AIMS: Abnormal Involuntary Movement Scale, ECT: Electroconvulsive therapy, PKN: Parkinsonism, DTRs: Deep tendon reflexes, NCV: Nerve conduction velocity, CT: Computerized tomography, MNCV: Motor nerve conduction velocities, CMAP: Compound muscle action potentials, SNAP: Sensory nerve action potential, EMG: Electromyography, MUPs: Motor unit potentials, PSW: Positive sharp waves, PRES: Posterior reversible encephalopathy syndrome, IV: Intravenous, DKN: Dyskinesia, BARS: Barnes Akathisia Rating Scale, SAS: Simpson-Angus Scale, ALS: Amyotrophic lateral sclerosis, UPDRS: Unified Parkinson's Disease Rating Scale, RLS: Restless legs syndrome, CJLS: Creutzfeldt-Jakob like syndrome, PSWC: Periodic sharp wave complexes, NSCE: Nonconvulsive status epilepticus, DTN: Dystonia, MCL: Myoclonus, LTM: Lithium, EEG: Electroencephalographic, MD: Movement disorder, WBC: White blood cells, BD: Bipolar disorder, MRI: Magnetic resonance imaging, SEP: Somatosensory evoked potentials, ICU: Intensive care unit, ATX: Ataxia, AKT: Akathisia, EPS: Extrapyramidal symptom, SPECT: Single-photon emission computed tomography, DaT: Dopamine transporter, PD: Parkinson's disease, AKT: Akathisia, CI: Confidence interval, COPD: Chronic obstructive pulmonary disease, ACE: Angiotensin-converting enzyme, MMSE: Mini-Mental State Examination, PET: Positron emission tomography, CSF: Cerebrospinal fluid, ENT: Ear, nose, and throat, HR: Hazard ratio, PSP: Progressive supranuclear palsy, CH: Clinical history, CM: Clinical management VPA: Valproic acid, IM: Intramuscular, DTRs: Deep tendon reflex, DPS: Depression, ICU: Intensive care unit, MAP: Mean arterial pressure, SNCV: Sural nerve conduction velocity, FLAIR: Fluid-attenuated inversion recovery, ER: Emergency room, LLR: long-latency reflexes, NAA: N-acetylaspartate, TD: Tardive Dyskinesia, TDP: Transactive DNA-binding protein, MSA: Multiple system atrophy, PRN: Pro re nata, FP-CIT: Iodine I 123-radiolabeled 2β-carbomethoxy-3β-(4-iodophenyl)-N-(3-fluoropropyl) norpropane, MOCA: Montreal cognitive assessment, WAIS: Wechsler adult intelligence scale, CR: Complete recovery, MHFG: 3-Methoxy-4-hydroxyphenylglycol, NCSE: Nonconvulsive status epilepticus, FIRDA: Frontal intermittent rhythmic delta activity, OROS: Osmotic release oral system, SAD: Schizoaffective disorder, RLS: Restless leg syndrome, MRS: Mania rating scale
